# Supplementary material for: Diversification and niche adaptations of Nitrospina-like bacteria in the polyextreme interfaces of Red Sea brines
Source: PubMed Central journal article supplement — ISME J. 2015 Dec 11;10(6):1383–99. doi: 10.1038/ismej.2015.214 (PMC5029188; doi:10.1038/ismej.2015.214), 2015-12-11
Supplement: ismej2015214x11.pdf [file ismej2015214x11.pdf]

**Table S1.** Metadata of the sampling location, where the SAGs were obtained.

|                                              |                                      |
|----------------------------------------------|--------------------------------------|
| Site description:                            | Atlantis II Deep (Red Sea), SW Basin |
| Lat. / Long.                                 | 21.20748 / 38.4831                   |
| Date of sampling                             | 12/4/10                              |
| Sampling depth (m)                           | 1,997                                |
| Sample description                           | Brine-seawater interface             |
| Filter size ( $\mu\text{m}$ )                | 0.1 – 0.8                            |
| Temperature ( $^{\circ}\text{C}$ )           | 31.8                                 |
| Salinity ( <i>psu</i> )                      | 56                                   |
| pH                                           | 6.5                                  |
| Dissolved oxygen ( $\mu\text{mol kg}^{-1}$ ) | 2.2                                  |
| Nitrate ( $\mu\text{M}$ ) <sup>a</sup>       | 55.3                                 |
| Ammonia ( $\mu\text{M}$ )                    | 2.0                                  |
| Urea ( $\mu\text{M}$ )                       | 1.7                                  |
| Fe (nM)                                      | 0.5                                  |
| Sulfate (mM) <sup>b</sup>                    | 32.5                                 |
| Mn (mM)                                      | 0.1                                  |
| Chloride (M)                                 | 0.8                                  |
| Na (M)                                       | 0.7                                  |
| Bromide (mM)                                 | 1.0                                  |
| K (mM)                                       | 13.2                                 |
| Ca (mM)                                      | 17.3                                 |
| Mg (mM)                                      | 61.8                                 |
| B (mM)                                       | 0.5                                  |
| Li ( $\mu\text{M}$ )                         | 49.6                                 |
| Sr ( $\mu\text{M}$ )                         | 121.5                                |
| Si (mM)                                      | 0.1                                  |
| Ba ( $\mu\text{M}$ )                         | 1.7                                  |

<sup>a</sup> Nitrite was below detection limit (0.1  $\mu\text{M}$ ).

<sup>b</sup>  $\text{H}_2\text{S}$  was below detection limit ( $\sim 1 \mu\text{M}$ ).
