# Supplementary material for: Diversification and niche adaptations of Nitrospina-like bacteria in the polyextreme interfaces of Red Sea brines
Source: PubMed Central journal article supplement — ISME J. 2015 Dec 11;10(6):1383–99. doi: 10.1038/ismej.2015.214 (PMC5029188; doi:10.1038/ismej.2015.214), 2015-12-11
Supplement: ismej2015214x12.pdf [file ismej2015214x12.pdf]

Table S2. Distance matrix of 105 SNPs of an *Atropis* (see background information used for constructing the tree presented in Figure 1).

|  | HD2746 | HD2747 | HD2748 | HD2749 | HD2750 | HD2751 | HD2752 | HD2753 | HD2754 | HD2755 | HD2756 | HD2757 | HD2758 | HD2759 | HD2760 | HD2761 | HD2762 | HD2763 | HD2764 | HD2765 | HD2766 | HD2767 | HD2768 | HD2769 | HD2770 | HD2771 | HD2772 | HD2773 | HD2774 | HD2775 | HD2776 | HD2777 | HD2778 | HD2779 | HD2780 | HD2781 | HD2782 | HD2783 | HD2784 | HD2785 | HD2786 | HD2787 | HD2788 | HD2789 | HD2790 | HD2791 | HD2792 | HD2793 | HD2794 | HD2795 | HD2796 | HD2797 | HD2798 | HD2799 | HD2800 | HD2801 | HD2802 | HD2803 | HD2804 | HD2805 | HD2806 | HD2807 | HD2808 | HD2809 | HD2810 | HD2811 | HD2812 | HD2813 | HD2814 | HD2815 | HD2816 | HD2817 | HD2818 | HD2819 | HD2820 | HD2821 | HD2822 | HD2823 | HD2824 | HD2825 | HD2826 | HD2827 | HD2828 | HD2829 | HD2830 | HD2831 | HD2832 | HD2833 | HD2834 | HD2835 | HD2836 | HD2837 | HD2838 | HD2839 | HD2840 | HD2841 | HD2842 | HD2843 | HD2844 | HD2845 | HD2846 | HD2847 | HD2848 | HD2849 | HD2850 | HD2851 | HD2852 | HD2853 | HD2854 | HD2855 | HD2856 | HD2857 | HD2858 | HD2859 | HD2860 | HD2861 | HD2862 | HD2863 | HD2864 | HD2865 | HD2866 | HD2867 | HD2868 | HD2869 | HD2870 | HD2871 | HD2872 | HD2873 | HD2874 | HD2875 | HD2876 | HD2877 | HD2878 | HD2879 | HD2880 | HD2881 | HD2882 | HD2883 | HD2884 | HD2885 | HD2886 | HD2887 | HD2888 | HD2889 | HD2890 | HD2891 | HD2892 | HD2893 | HD2894 | HD2895 | HD2896 | HD2897 | HD2898 | HD2899 | HD2900 | HD2901 | HD2902 | HD2903 | HD2904 | HD2905 | HD2906 | HD2907 | HD2908 | HD2909 | HD2910 | HD2911 | HD2912 | HD2913 | HD2914 | HD2915 | HD2916 | HD2917 | HD2918 | HD2919 | HD2920 | HD2921 | HD2922 | HD2923 | HD2924 | HD2925 | HD2926 | HD2927 | HD2928 | HD2929 | HD2930 | HD2931 | HD2932 | HD2933 | HD2934 | HD2935 | HD2936 | HD2937 | HD2938 | HD2939 | HD2940 | HD2941 | HD2942 | HD2943 | HD2944 | HD2945 | HD2946 | HD2947 | HD2948 | HD2949 | HD2950 | HD2951 | HD2952 | HD2953 | HD2954 | HD2955 | HD2956 | HD2957 | HD2958 | HD2959 | HD2960 | HD2961 | HD2962 | HD2963 | HD2964 | HD2965 | HD2966 | HD2967 | HD2968 | HD2969 | HD2970 | HD2971 | HD2972 | HD2973 | HD2974 | HD2975 | HD2976 | HD2977 | HD2978 | HD2979 | HD2980 | HD2981 | HD2982 | HD2983 | HD2984 | HD2985 | HD2986 | HD2987 | HD2988 | HD2989 | HD2990 | HD2991 | HD2992 | HD2993 | HD2994 | HD2995 | HD2996 | HD2997 | HD2998 | HD2999 | HD3000 |
|--|--------|--------|--------|--------|--------|--------|--------|--------|--------|--------|--------|--------|--------|--------|--------|--------|--------|--------|--------|--------|--------|--------|--------|--------|--------|--------|--------|--------|--------|--------|--------|--------|--------|--------|--------|--------|--------|--------|--------|--------|--------|--------|--------|--------|--------|--------|--------|--------|--------|--------|--------|--------|--------|--------|--------|--------|--------|--------|--------|--------|--------|--------|--------|--------|--------|--------|--------|--------|--------|--------|--------|--------|--------|--------|--------|--------|--------|--------|--------|--------|--------|--------|--------|--------|--------|--------|--------|--------|--------|--------|--------|--------|--------|--------|--------|--------|--------|--------|--------|--------|--------|--------|--------|--------|--------|--------|--------|--------|--------|--------|--------|--------|--------|--------|--------|--------|--------|--------|--------|--------|--------|--------|--------|--------|--------|--------|--------|--------|--------|--------|--------|--------|--------|--------|--------|--------|--------|--------|--------|--------|--------|--------|--------|--------|--------|--------|--------|--------|--------|--------|--------|--------|--------|--------|--------|--------|--------|--------|--------|--------|--------|--------|--------|--------|--------|--------|--------|--------|--------|--------|--------|--------|--------|--------|--------|--------|--------|--------|--------|--------|--------|--------|--------|--------|--------|--------|--------|--------|--------|--------|--------|--------|--------|--------|--------|--------|--------|--------|--------|--------|--------|--------|--------|--------|--------|--------|--------|--------|--------|--------|--------|--------|--------|--------|--------|--------|--------|--------|--------|--------|--------|--------|--------|--------|--------|--------|--------|--------|--------|--------|--------|--------|--------|--------|--------|--------|--------|--------|--------|--------|--------|--------|--------|--------|--------|--------|--------|--------|--------|--------|--------|--------|--------|--------|--------|
|  | 0.00   | 0.01   | 0.02   | 0.03   | 0.04   | 0.05   | 0.06   | 0.07   | 0.08   | 0.09   | 0.10   | 0.11   | 0.12   | 0.13   | 0.14   | 0.15   | 0.16   | 0.17   | 0.18   | 0.19   | 0.20   | 0.21   | 0.22   | 0.23   | 0.24   | 0.25   | 0.26   | 0.27   | 0.28   | 0.29   | 0.30   | 0.31   | 0.32   | 0.33   | 0.34   | 0.35   | 0.36   | 0.37   | 0.38   | 0.39   | 0.40   | 0.41   | 0.42   | 0.43   | 0.44   | 0.45   | 0.46   | 0.47   | 0.48   | 0.49   | 0.50   | 0.51   | 0.52   | 0.53   | 0.54   | 0.55   | 0.56   | 0.57   | 0.58   | 0.59   | 0.60   | 0.61   | 0.62   | 0.63   | 0.64   | 0.65   | 0.66   | 0.67   | 0.68   | 0.69   | 0.70   | 0.71   | 0.72   | 0.73   | 0.74   | 0.75   | 0.76   | 0.77   | 0.78   | 0.79   | 0.80   | 0.81   | 0.82   | 0.83   | 0.84   | 0.85   | 0.86   | 0.87   | 0.88   | 0.89   | 0.90   | 0.91   | 0.92   | 0.93   | 0.94   | 0.95   | 0.96   | 0.97   | 0.98   | 0.99   | 1.00   |        |        |        |        |        |        |        |        |        |        |        |        |        |        |        |        |        |        |        |        |        |        |        |        |        |        |        |        |        |        |        |        |        |        |        |        |        |        |        |        |        |        |        |        |        |        |        |        |        |        |        |        |        |        |        |        |        |        |        |        |        |        |        |        |        |        |        |        |        |        |        |        |        |        |        |        |        |        |        |        |        |        |        |        |        |        |        |        |        |        |        |        |        |        |        |        |        |        |        |        |        |        |        |        |        |        |        |        |        |        |        |        |        |        |        |        |        |        |        |        |        |        |        |        |        |        |        |        |        |        |        |        |        |        |        |        |        |        |        |        |        |        |        |        |        |        |        |        |        |        |        |        |        |        |

105 SNPs gene assembly

105 SNPs gene assembly
