# Supplementary material for: Diversification and niche adaptations of Nitrospina-like bacteria in the polyextreme interfaces of Red Sea brines
Source: PubMed Central journal article supplement — ISME J. 2015 Dec 11;10(6):1383–99. doi: 10.1038/ismej.2015.214 (PMC5029188; doi:10.1038/ismej.2015.214), 2015-12-11
Supplement: ismej2015214x13.pdf [file ismej2015214x13.pdf]

**Table S3.** Estimation of genome completeness based on 104 single-copy genes present in 5,449 complete bacterial genomes using CheckM (v0.9.7).

| Genome/SAGs                                | Marker sets occurrence as: <sup>a</sup> |            |            | % Completeness | % Contamination <sup>b</sup> | % Heterogeneity <sup>c</sup> | Assembly size (bp) | Est. genome size (Mbp) |
|--------------------------------------------|-----------------------------------------|------------|------------|----------------|------------------------------|------------------------------|--------------------|------------------------|
|                                            | Singletons                              | Doubletons | Tripletons |                |                              |                              |                    |                        |
| <i>Nitrospina gracilis</i>                 | 101                                     | 1          | 0          | 96.6           | 1.72                         | 0                            | 3,067,213          | 3.17                   |
| <i>Ca. Nitromaritima sp. A02</i>           | 18                                      | 0          | 0          | 19.8           | 0                            | 0                            | 1,404,272          | 2.53                   |
| <i>Ca. Nitromaritima sp. C22</i>           | 26                                      | 0          | 0          | 39.7           | 0                            | 0                            | 1,678,166          | 2.69                   |
| <i>Ca. Nitromaritima sp. B06 (Current)</i> | 41                                      | 0          | 0          | 29.9           | 0                            | 0                            | 708,914            | 1.21                   |
| <i>Ca. Nitromaritima sp. B18 (Current)</i> | 85                                      | 1          | 0          | 73.3           | 1.72                         | 0                            | 2,139,866          | 2.71                   |
| <i>Ca. Nitromaritima sp. L16</i>           | 83                                      | 0          | 0          | 75.2           | 0                            | 0                            | 2,077,614          | 2.59                   |
| <i>Nitrobacter winogradskyi</i>            | 104                                     | 0          | 0          | 100.0          | 0                            | 0                            |                    |                        |
| <i>Nitrobacter hamburgensis</i>            | 104                                     | 0          | 0          | 100.0          | 0                            | 0                            |                    |                        |
| <i>Nitrococcus mobilis</i>                 | 103                                     | 0          | 0          | 98.3           | 0                            | 0                            |                    |                        |
| <i>Ca. Nitrospira defluvii</i>             | 102                                     | 0          | 0          | 97.4           | 0                            | 0                            |                    |                        |
| <i>Ca. Kuenenia stuttgartensis</i>         | 101                                     | 0          | 0          | 94.8           | 0                            | 0                            |                    |                        |
| <i>Nitrolanceus hollandicus</i>            | 95                                      | 1          | 0          | 91.9           | 0.86                         | 0                            |                    |                        |

<sup>a</sup> More details on marker sets can be found in Parks et al. (2015).

<sup>b</sup> Determined by the number of single-copy genes that occur more than once.

<sup>c</sup> Determined from the number of multi-copy genes, which exceed a specified amino acids threshold (see methods in CheckM publication; Parks et al., 2015).
