# Supplementary material for: Diversification and niche adaptations of Nitrospina-like bacteria in the polyextreme interfaces of Red Sea brines
Source: PubMed Central journal article supplement — ISME J. 2015 Dec 11;10(6):1383–99. doi: 10.1038/ismej.2015.214 (PMC5029188; doi:10.1038/ismej.2015.214), 2015-12-11
Supplement: ismej2015214x14.pdf [file ismej2015214x14.pdf]

**Table S4.** 454 metagenomic libraries and their associated metadata that were used for fragment recruitment analyses.

| Dataset / Location / (Site ID)                                            | Short Reads Archive Number/<br>BioProject ID (or MGRAST ID) | Lat. / Long.       | Date<br>(mm/dd/yy) | Sampling<br>depth (m) | Habitat<br>description         | Filter used<br>( $\mu\text{m}$ ) | Total reads<br>(counts) | Temp.<br>( $^{\circ}\text{C}$ ) | Salinity<br>(psu) | Diss.O <sub>2</sub><br>( $\mu\text{mol kg}^{-1}$ ) | NO <sub>x</sub><br>( $\mu\text{M}$ ) | PO <sub>4</sub> <sup>-</sup><br>( $\mu\text{M}$ ) | Iron<br>(nM) | Chl <i>a</i><br>( $\mu\text{g kg}^{-1}$ ) | Water depth<br>(m) |
|---------------------------------------------------------------------------|-------------------------------------------------------------|--------------------|--------------------|-----------------------|--------------------------------|----------------------------------|-------------------------|---------------------------------|-------------------|----------------------------------------------------|--------------------------------------|---------------------------------------------------|--------------|-------------------------------------------|--------------------|
| <b>Water column Eastern Tropical South Pacific (ETSP) <sup>a, b</sup></b> |                                                             |                    |                    |                       |                                |                                  |                         |                                 |                   |                                                    |                                      |                                                   |              |                                           |                    |
| 2008OMZ-15m                                                               | SRX080962                                                   | -20.07 / -70.23    | June, 2008         | 15.0                  | Open ocean                     | 0.2 – 1.6                        | 771,623                 | 17.0                            | 34.82             | 198.9                                              |                                      |                                                   |              | 1.270                                     | 1050               |
| 2008OMZ-50m                                                               | SRX025906                                                   | -20.07 / -70.23    | June, 2008         | 50.0                  | Open ocean                     | 0.2 – 1.6                        | 341,163                 | 14.7                            | 34.74             | 98.9                                               |                                      |                                                   |              | 0.440                                     | 1050               |
| 2008OMZ-85m                                                               | SRX025908                                                   | -20.07 / -70.23    | June, 2008         | 85.0                  | Open ocean                     | 0.2 – 1.6                        | 569,046                 | 13.6                            | 34.83             | 28.5                                               |                                      |                                                   |              | 0.030                                     | 1050               |
| 2008OMZ-110m                                                              | SRX025910                                                   | -20.07 / -70.23    | June, 2008         | 110.0                 | Open ocean                     | 0.2 – 1.6                        | 380,764                 | 13.2                            | 34.91             | 4.9                                                |                                      |                                                   |              | 0.040                                     | 1050               |
| 2008OMZ-200m                                                              | SRX025912                                                   | -20.07 / -70.23    | June, 2008         | 200.0                 | Open ocean                     | 0.2 – 1.6                        | 485,911                 | 12.5                            | 34.87             | 3.4                                                |                                      |                                                   |              | 0.000                                     | 1050               |
| 2008OMZ-500m                                                              | SRX080950                                                   | -20.07 / -70.23    | June, 2008         | 500.0                 | Open ocean                     | 0.2 – 1.6                        | 515,676                 | 8.2                             | 34.58             | 13.1                                               |                                      |                                                   |              | 0.000                                     | 1050               |
| 2009OMZ-35m                                                               | SRX080953                                                   | -20.07 / -70.23    | 1/16/09            | 35.0                  | Open ocean                     | 0.2 – 1.6                        | 973,420                 | 16.8                            | 35.03             | 203.1                                              |                                      |                                                   |              | 4.081                                     | 1050               |
| 2009OMZ-50m                                                               | SRX080954                                                   | -20.07 / -70.23    | 1/16/09            | 50.0                  | Open ocean                     | 0.2 – 1.6                        | 1,042,057               | 14.54                           | 34.82             | 57.2                                               |                                      |                                                   |              | 2.698                                     | 1050               |
| 2009OMZ-70m                                                               | SRX029170                                                   | -20.07 / -70.23    | 1/15/09            | 70.0                  | Open ocean                     | 0.2 – 1.6                        | 1,147,856               | 13.8                            | 34.84             | 4.9                                                |                                      |                                                   |              | 0.331                                     | 1050               |
| 2009OMZ-110m                                                              | SRX080955                                                   | -20.07 / -70.23    | 1/12/09            | 110.0                 | Open ocean                     | 0.2 – 1.6                        | 905,059                 | 13.0                            | 34.87             | 1.3                                                |                                      |                                                   |              | 0.200                                     | 1050               |
| 2009OMZ-200m                                                              | SRX029171                                                   | -20.07 / -70.23    | 1/11/09            | 200.0                 | Open ocean                     | 0.2 – 1.6                        | 930,359                 | 12.1                            | 34.84             | 1.8                                                |                                      |                                                   |              | 0.110                                     | 1050               |
| 2010OMZ-50m                                                               | SRX080956                                                   | -20.07 / -70.23    | 1/15/10            | 50.0                  | Open ocean                     | 0.2 – 1.6                        | 1,530,891               | 13.8                            | 34.83             | 0.1                                                | 16.460                               | 3.210                                             |              | 0.990                                     | 1050               |
| 2010OMZ-80m                                                               | SRX029172                                                   | -20.07 / -70.23    | 1/16/10            | 80.0                  | Open ocean                     | 0.2 – 1.6                        | 1,359,823               | 13.6                            | 34.91             | 0.0                                                | 17.300                               | 3.280                                             |              | 0.250                                     | 1050               |
| 2010OMZ-110m                                                              | SRX080960                                                   | -20.07 / -70.23    | 1/12/10            | 110.0                 | Open ocean                     | 0.2 – 1.6                        | 1,456,845               | 13.2                            | 34.90             | 0.0                                                | 16.400                               | 3.220                                             |              | 0.180                                     | 1050               |
| <b>Water column Central Red Sea <sup>c, d, e</sup></b>                    |                                                             |                    |                    |                       |                                |                                  |                         |                                 |                   |                                                    |                                      |                                                   |              |                                           |                    |
| 50 m                                                                      | SRS403288 (4446000)                                         | 21.2076 / 38.468   | 27/10/2008         | 50.0                  | Open ocean                     | 0.1 – 0.8                        | 1,082,048               | 27.3                            | 39.38             | 238.4                                              | 0.140                                | 0.120                                             |              | 0.229                                     | 1050               |
| 200 m                                                                     | (4446962)                                                   | 21.2076 / 38.468   | 27/10/2008         | 200.0                 | Mesopelagic                    | 0.1 – 0.8                        | 638,577                 | 22.0                            | 40.50             | 129.0                                              |                                      |                                                   |              |                                           |                    |
| 700 m                                                                     | (4446968)                                                   | 21.2076 / 38.468   | 27/10/2008         | 700.0                 | Mesopelagic                    | 0.1 – 0.8                        | 640,233                 | 21.6                            | 40.55             | 81.2                                               |                                      |                                                   |              | 0.062                                     |                    |
| 1500 m                                                                    | (4446029)                                                   | 21.2076 / 38.468   | 27/10/2008         | 1500.0                | Bathypelagic                   | 0.1 – 0.8                        | 1,125,134               | 21.7                            | 40.55             | 115.0                                              |                                      |                                                   |              | 0.000                                     |                    |
| 50 m                                                                      | SRS598124                                                   | 21.60528 / 38.2025 | 6/4/10             | 50.2                  | Open ocean                     | 0.1 – 0.8                        | 1,319,943               | 25.0                            | 39.80             | 174.0                                              |                                      |                                                   |              |                                           |                    |
| 200 m                                                                     | SRS598125                                                   | 21.60528 / 38.2025 | 6/4/10             | 202.0                 | Mesopelagic                    | 0.1 – 0.8                        | 1,112,752               | 22.0                            | 40.40             | 124.0                                              |                                      |                                                   |              |                                           |                    |
| 700 m                                                                     | SRS598128                                                   | 21.60528 / 38.2025 | 6/4/10             | 700.3                 | Mesopelagic                    | 0.1 – 0.8                        | 987,012                 | 21.6                            | 40.50             | 69.0                                               |                                      |                                                   |              |                                           |                    |
| 1500 m                                                                    | SRS598129                                                   | 21.60528 / 38.2025 | 6/4/10             | 1515.7                | Bathypelagic                   | 0.1 – 0.8                        | 749,110                 | 21.7                            | 40.60             | 85.0                                               |                                      |                                                   |              |                                           |                    |
| <b>Brine-seawater interface (BSI) &amp; brine samples <sup>d, f</sup></b> |                                                             |                    |                    |                       |                                |                                  |                         |                                 |                   |                                                    |                                      |                                                   |              |                                           |                    |
| SW Basin, Atlantis II Deep BSI (AD-bsi)                                   | SRR988525/                                                  | 21.20748 / 38.4831 | 12/4/10            | 1997.0                | Brine-seawater interface (bsi) | 0.1 – 0.8                        | 604,000                 | 31.8                            | 56.00             | 2.2                                                | 55.300                               |                                                   | 0.500        |                                           |                    |
| SW Basin, Atlantis II Deep upper convective layer (AD-ucl)                | n.p./ SAMN02401041                                          | 21.20710 / 38.4820 | 12/4/10            | 2050.0                | Upper convective layer (ucl)   | 0.1 – 0.8                        | 660,692                 | 46.0                            | 86.00             | 0.5                                                | 37.900                               |                                                   | 0.800        |                                           |                    |
| SW Basin, Atlantis II Deep lower convective layer (AD-lcl)                | n.p./ SAMN02401042                                          | 21.20833 / 38.4867 | 12/4/10            | 2058.8                | Lower convective layer (lcl)   | 0.1 – 0.8                        | 3,562,967               | 65.0                            | 154.00            | 0.5                                                | 46.100                               |                                                   | 70.500       |                                           |                    |
| Discovery Deep BSI (DD-bsi)                                               | SRR988526/                                                  | 21.16894 / 38.3023 | 8/4/10             | 2031.0                | Brine-seawater interface (bsi) | 0.1 – 0.8                        | 658,619                 | 35.8                            | 138.00            | 0.3                                                | 30.100                               |                                                   | 0.600        |                                           |                    |
| Discovery Deep brine (DD-brine)                                           | n.p./ SAMN02401043                                          | 21.16980 / 38.2980 | 8/4/10             | 2095.6                | Brine                          | 0.1 – 0.8                        | 669,512                 | 44.8                            | 260.00            | 0.3                                                | 43.900                               |                                                   | 0.100        |                                           |                    |
| Kebrit Deep upper convective layer (KD-ucl)                               | SRR988536; SRR988537/                                       | 24.4341 / 36.1663  | 24/03/2010         | 1467.0                | Upper convective layer (ucl)   | 0.1 – 0.8                        | 1,417,636               | 21.9                            | 182.00            | 4.6                                                | 28.400                               |                                                   | 40.400       |                                           |                    |
| Kebrit Deep lower convective layer (KD-lcl)                               | SRR988539/                                                  | 24.4341 / 36.1663  | 24/03/2010         | 1469.0                | Lower convective layer (lcl)   | 0.1 – 0.8                        | 1,370,213               | 23.0                            | 220.00            | 3.1                                                |                                      |                                                   |              |                                           |                    |
| Kebrit Deep brine (KD-brine)                                              | n.p./                                                       | 24.4341 / 36.1663  | 24/03/2010         | 1490.0                | Brine                          | 0.1 – 0.8                        | 1,139,639               | 23.4                            | 260.00            | 2.3                                                | 44.100                               |                                                   | 1.500        |                                           |                    |

n.p., not provided but currently being processed (Lotaief et al, manuscript in preparation).

<sup>a</sup> Stewart et al. (2011). Genome Biol. 12:R26.

<sup>b</sup> Bryant et al. (2012). Ecol. 93: 1659–1673.

<sup>c</sup> Ferreira et al. (2014). PLoS One 9: e97338.

<sup>d</sup> Ngugi et al. (2014). ISME J. 9: 396–411.

<sup>e</sup> Thompson et al. (2013). Ecol. Evol. 6: 1780–1797.

<sup>f</sup> Adballah et al. (2014). Front. Microbiol. 5: 487.
