# Supplementary material for: Diversification and niche adaptations of Nitrospina-like bacteria in the polyextreme interfaces of Red Sea brines
Source: PubMed Central journal article supplement — ISME J. 2015 Dec 11;10(6):1383–99. doi: 10.1038/ismej.2015.214 (PMC5029188; doi:10.1038/ismej.2015.214), 2015-12-11
Supplement: ismej2015214x15.pdf [file ismej2015214x15.pdf]

**Table S5.** The percentage of nucleotides overlap (upper triangle) and average nucleotide identity (ANI, lower triangle) between pairs of genomes, including our SAGs (in bold), the related *Ca. Nitromaritima* SAGs and fosmids (in red and green respectively), and canonical NOBs.

|                                      | 1    | 2    | 3    | 4    | 5    | 6    | 7    | 8    | 9    | 10   | 11   | 12   | 13   | 14   | 15  |
|--------------------------------------|------|------|------|------|------|------|------|------|------|------|------|------|------|------|-----|
| 1. SCGC AAA799-A02                   | ---  | 43.4 | 12.6 | 13.1 | 13.9 | 47.2 | 25.4 | 17.9 | 42.1 | 10.6 | 0.6  | 0.7  | 1.8  | 1.3  | 1.0 |
| 2. SCGC AAA799-C22                   | 99.2 | ---  | 16.1 | 20.1 | 19.9 | 54.0 | 57.9 | 32.0 | 46.8 | 14.3 | 1.1  | 0.9  | 1.1  | 1.9  | 1.2 |
| 3. SCG AB629-B06                     | 68.6 | 68.4 | ---  | 67.1 | 54.7 | 33.6 | 77.3 | 19.7 | 22.5 | 22.8 | 0.7  | 0.6  | 0.3  | 1.1  | 1.2 |
| 4. SCGC AB629-B18                    | 68.6 | 68.6 | 85.3 | ---  | 66.5 | 87.7 | 89.3 | 37.3 | 38.1 | 15.3 | 1.0  | 0.8  | 0.7  | 2.0  | 1.8 |
| 5. SCGC AAA288-L16                   | 68.4 | 68.3 | 84.7 | 92.5 | ---  | 98.6 | 94.4 | 35.6 | 46.7 | 13.4 | 0.9  | 0.6  | 0.5  | 1.6  | 1.6 |
| 6. HF0770_08F21 (Fosmid)             | 76.7 | 75.1 | 85.6 | 91.9 | 90.8 | ---  | 38.7 | 18.5 | 42.2 | 0.5  | 0.1  | 0.1  | 0.1  | 0.1  | 0.2 |
| 7. 4050020-J15 (Fosmid)              | 81.7 | 72.0 | 81.6 | 89.5 | 90.1 | 89.3 | ---  | 15.2 | 27.2 | 0.5  | 0.1  | 0.2  | 0.1  | 0.1  | 0.1 |
| 8. EB080L20_F04 (Fosmid)             | 75.8 | 71.1 | 69.3 | 68.4 | 69.1 | 75.0 | 75.6 | ---  | 54.5 | 0.9  | 0.1  | 0.2  | 0.1  | 0.1  | 0.2 |
| 9. HF0200_07G10 (Fosmid)             | 72.5 | 72.1 | 67.6 | 73.6 | 72.3 | 72.9 | 76.7 | 84.7 | ---  | 0.6  | 0.1  | 0.1  | 0.1  | 0.1  | 0.1 |
| 10. <i>Nitrospina gracilis</i>       | 66.5 | 66.8 | 63.2 | 63.3 | 63.2 | 71.5 | 70.7 | 67.8 | 70.6 | ---  | 2.9  | 2.6  | 3.0  | 4.9  | 1.8 |
| 11. <i>Nitrococcus mobilis</i>       | 63.0 | 61.5 | 60.2 | 60.7 | 60.8 | 77.1 | 77.4 | 79.1 | 79.6 | 62.4 | ---  | 2.3  | 5.4  | 2.7  | 0.9 |
| 12. <i>Nitrolancetus hollandicus</i> | 63.4 | 63.3 | 59.4 | 60.8 | 61.0 | 70.6 | 69.8 | 67.4 | 70.5 | 62.7 | 62.5 | ---  | 2.7  | 2.1  | 0.8 |
| 13. <i>Nitrobacter winogradskyi</i>  | 64.2 | 63.5 | 61.6 | 60.0 | 61.2 | 78.4 | 78.3 | 77.9 | 78.8 | 63.9 | 63.9 | 63.7 | ---  | 2.7  | 0.7 |
| 14. "Nitrospira defluvii"            | 63.0 | 62.6 | 60.1 | 60.9 | 60.6 | 71.4 | 71.2 | 76.2 | 71.0 | 62.9 | 62.3 | 62.7 | 63.3 | ---  | 1.6 |
| 15. "Kuenenia stuttgartiensis"       | 62.0 | 61.4 | 60.2 | 60.7 | 60.6 | 65.5 | 65.8 | 65.2 | 68.6 | 60.0 | 60.7 | 61.1 | 60.9 | 61.0 | --- |

The color codes denote *Nitrospina*-like genome clusters that are phylogenetically related at the rRNA gene level as indicated in Figure 1.
