# Supplementary material for: Diversification and niche adaptations of Nitrospina-like bacteria in the polyextreme interfaces of Red Sea brines
Source: PubMed Central journal article supplement — ISME J. 2015 Dec 11;10(6):1383–99. doi: 10.1038/ismej.2015.214 (PMC5029188; doi:10.1038/ismej.2015.214), 2015-12-11
Supplement: ismej2015214x17.pdf [file ismej2015214x17.pdf]

**Table S7.** Spearman correlation coefficient in the occurrence of genes.

|                                                   | 1      | 2       | 3       | <i>amoA</i> |
|---------------------------------------------------|--------|---------|---------|-------------|
| <i>nxrA</i> (L-NOBs)                              | 0.48** | 0.53*** | 0.97*** | -0.31       |
| 1 All <i>nxrA</i> genes (including anammox)       | -      | 0.80*** | 0.52*** | 0.40*       |
| 2 HNOB <i>nxrA</i> gene types (excluding anammox) |        | -       | 0.54*** | 0.23        |
| 3 <i>narG</i>                                     |        |         | -       | -0.22       |

\*,  $P < 0.05$ ; \*\*,  $P < 0.01$ ; \*\*\*,  $P < 0.001$ .
