# Supplementary material for: Diversification and niche adaptations of Nitrospina-like bacteria in the polyextreme interfaces of Red Sea brines
Source: PubMed Central journal article supplement — ISME J. 2015 Dec 11;10(6):1383–99. doi: 10.1038/ismej.2015.214 (PMC5029188; doi:10.1038/ismej.2015.214), 2015-12-11
Supplement: ismej2015214x18.pdf [file ismej2015214x18.pdf]

**Table S8.** Unique genesets in the pan-genome of *Ca. Nitrospirillum RS* (relative to the genome of *Nitrospina gracilis*). Genes discussed in the main text or depicted in Figure 6 are highlighted in red.

| Gene locus IDs | Predicted function                                                     | Remarks |
|----------------|------------------------------------------------------------------------|---------|
| NspA02_00001   | radical SAM domain-containing protein                                  |         |
| NspA02_00002   | hypothetical protein                                                   |         |
| NspA02_00003   | hypothetical protein                                                   |         |
| NspA02_00004   | lipopolysaccharides biosynthesis glycosyltransferase protein           |         |
| NspA02_00008   | Pyruvate dehydrogenase E1 component subunit alpha protein              |         |
| NspA02_00010   | UDP-4-amino-4-deoxy-L-arabinose--oxoglutarate aminotransferase protein |         |
| NspA02_00011   | Putative mannose-1-phosphate guanyltransferase protein                 |         |
| NspA02_00013   | RNA pyrophosphohydrolase protein                                       |         |
| NspA02_00014   | Release factor glutamine methyltransferase protein                     |         |
| NspA02_00015   | Methyltransferase domain protein                                       |         |
| NspA02_00016   | putative membrane protein                                              |         |
| NspA02_00017   | hypothetical protein                                                   |         |
| NspA02_00018   | polysaccharide transporter protein                                     |         |
| NspA02_00019   | hypothetical protein                                                   |         |
| NspA02_00020   | hypothetical protein                                                   |         |
| NspA02_00023   | Cyanobacterial phytochrome A protein                                   |         |
| NspA02_00039   | <b>N-alpha-acetyl-L-24-diaminobutyrate deacetylase protein</b>         |         |
| NspA02_00040   | hypothetical protein                                                   |         |
| NspA02_00043   | hypothetical protein                                                   |         |
| NspA02_00044   | hypothetical protein                                                   |         |
| NspA02_00045   | putative RNA polymerase sigma-C factor protein                         |         |
| NspA02_00051   | TPR repeat domain containing protein                                   |         |
| NspA02_00057   | ATPase-like protein                                                    |         |
| NspA02_00058   | Alginate biosynthesis protein AlgK                                     |         |
| NspA02_00059   | heat shock protein DnaJ domain-containing protein                      |         |
| NspA02_00061   | hypothetical protein                                                   |         |
| NspA02_00064   | Iron-dependent oxidoreductase EgtB protein                             |         |
| NspA02_00070   | hypothetical protein                                                   |         |
| NspA02_00071   | Sensory rhodopsin II transducer protein                                |         |
| NspA02_00072   | Nitrogen fixation protein NifU                                         |         |
| NspA02_00073   | hypothetical protein                                                   |         |
| NspA02_00074   | hypothetical protein                                                   |         |
| NspA02_00076   | transposase of ISGsu5 protein                                          |         |
| NspA02_00077   | hypothetical protein                                                   |         |
| NspA02_00078   | adventurous gliding protein T                                          |         |
| NspA02_00079   | hypothetical protein                                                   |         |
| NspA02_00080   | hypothetical protein                                                   |         |
| NspA02_00082   | Cyclic nucleotide-binding domain protein                               |         |
| NspA02_00085   | Dolichyl-phosphate-mannose-protein domain containing protein           |         |
| NspA02_00086   | putative 1-acyl-sn-glycerol-3-phosphate acyltransferase protein        |         |
| NspA02_00087   | hypothetical protein                                                   |         |
| NspA02_00088   | hypothetical protein                                                   |         |
| NspA02_00089   | aspartyl protease protein                                              |         |
| NspA02_00092   | hypothetical protein                                                   |         |
| NspA02_00093   | membrane YfhO protein                                                  |         |
| NspA02_00094   | putative spermidine synthase protein                                   |         |
| NspA02_00095   | membrane YfhO protein                                                  |         |
| NspA02_00096   | dolichol-phosphate mannosyltransferase protein                         |         |
| NspA02_00098   | serine O-acetyltransferase protein                                     |         |
| NspA02_00103   | TPR repeat domain containing protein                                   |         |
| NspA02_00107   | Group 1 hemoglobin GlnN protein                                        |         |
| NspA02_00108   | PilZ domain protein                                                    |         |
| NspA02_00110   | hypothetical protein                                                   |         |
| NspA02_00111   | type IV pilus minor pilin PilW protein                                 |         |
| NspA02_00112   | hypothetical protein                                                   |         |
| NspA02_00115   | putative type IV pilus assembly protein PilP                           |         |
| NspA02_00116   | pilus assembly protein PilO                                            |         |
| NspA02_00117   | hypothetical protein                                                   |         |
| NspA02_00119   | hypothetical protein                                                   |         |
| NspA02_00120   | hypothetical protein                                                   |         |
| NspA02_00124   | hypothetical protein                                                   |         |
| NspA02_00125   | hypothetical protein                                                   |         |
| NspA02_00131   | hypothetical protein                                                   |         |
| NspA02_00145   | hypothetical protein                                                   |         |
| NspA02_00146   | hypothetical protein                                                   |         |
| NspA02_00147   | hypothetical protein                                                   |         |
| NspA02_00149   | Magnesium-protoporphyrin IX monomethyl ester oxidative cyclase protein |         |
| NspA02_00150   | Mtn3-saliva-related transmembrane protein conserved region             |         |
| NspA02_00151   | hypothetical protein                                                   |         |
| NspA02_00156   | hypothetical protein                                                   |         |
| NspA02_00160   | hypothetical protein                                                   |         |
| NspA02_00161   | oxidoreductase protein                                                 |         |
| NspA02_00162   | myo-inositol 2-dehydrogenase protein                                   |         |
| NspA02_00163   | flagellar protein FlaG protein                                         |         |
| NspA02_00164   | Flagellin protein                                                      |         |
| NspA02_00166   | NAD+ kinase protein                                                    |         |
| NspA02_00179   | SPOR domain-containing protein                                         |         |
| NspA02_00184   | Protein of unknown function DUF58                                      |         |
| NspA02_00186   | Ribosomal RNA large subunit methyltransferase M protein                |         |
| NspA02_00187   | hypothetical protein                                                   |         |
| NspA02_00188   | hypothetical protein                                                   |         |
| NspA02_00190   | hypothetical protein                                                   |         |
| NspA02_00191   | Sensor histidine kinase AruS protein                                   |         |
| NspA02_00195   | hypothetical protein                                                   |         |
| NspA02_00196   | hypothetical protein                                                   |         |
| NspA02_00197   | Cyanobacterial phytochrome A protein                                   |         |
| NspA02_00198   | hypothetical protein                                                   |         |

NspA02\_00199 Transcriptional regulatory protein ZraR  
NspA02\_00200 hypothetical protein  
NspA02\_00203 Chaperone protein DnaJ  
NspA02\_00205 Undecaprenyl-phosphate 4-deoxy-4-formamido-L-arabinose transferase protein  
NspA02\_00206 Lipid-A-disaccharide synthase protein  
NspA02\_00207 hypothetical protein  
NspA02\_00208 phosphoglycerol transferase protein  
NspA02\_00209 hypothetical protein  
NspA02\_00218 hypothetical protein  
NspA02\_00220 Serine-threonine-protein kinase pkn1  
NspA02\_00231 Cellulose synthesis regulatory protein  
NspA02\_00240 hypothetical protein  
NspA02\_00244 tRNA-lysine synthase protein  
NspA02\_00245 Chaperone SurA protein  
NspA02\_00247 Transcription-repair-coupling factor protein  
NspA02\_00249 Chromosomal replication initiator protein DnaA  
NspA02\_00250 transposase protein  
NspA02\_00252 hypothetical protein  
NspA02\_00253 hypothetical protein  
NspA02\_00254 hypothetical protein  
NspA02\_00255 hypothetical protein  
NspA02\_00256 metal dependent phosphohydrolase protein  
NspA02\_00257 metal-dependent phosphohydrolase HDOD domain-containing protein  
NspA02\_00258 Sensory rhodopsin II transducer protein  
NspA02\_00259 Group 1 hemoglobin Gln protein  
NspA02\_00260 sodium-glucose cotransport protein  
NspA02\_00262 Para-aminobenzoate synthase protein  
NspA02\_00278 ISCja2 transposase protein  
NspA02\_00279 Putative transposase y4zB protein  
NspA02\_00280 Chemotaxis response regulator protein-glutamate methyltransferase 1  
NspA02\_00281 hypothetical protein  
NspA02\_00282 hypothetical protein  
NspA02\_00283 Coenzyme PQQ synthesis protein E  
NspA02\_00284 hypothetical protein  
NspA02\_00285 hypothetical protein  
NspA02\_00286 transposase protein  
NspA02\_00287 zinc-ribbon domain protein  
NspA02\_00290 putative transmembrane protein  
NspA02\_00292 Peptide deformylase 2 protein  
NspA02\_00296 Cbb3-type cytochrome c oxidase subunit CcoP protein  
NspA02\_00298 Pyruvate kinase protein  
NspA02\_00313 hypothetical protein  
NspA02\_00321 hypothetical protein  
NspA02\_00322 alkylhydroperoxidase protein  
NspA02\_00323 HTH-type transcriptional repressor AcnR protein  
NspA02\_00326 hypothetical protein  
NspA02\_00332 Cell division protein FtsQ  
NspA02\_00333 hypothetical protein  
NspA02\_00334 Sensory rhodopsin II transducer protein  
NspA02\_00342 Response regulator SaeR protein  
NspA02\_00343 metal-dependent phosphohydrolase HDOD domain-containing protein  
NspA02\_00344 hypothetical protein  
NspA02\_00346 hypothetical protein  
NspA02\_00348 hypothetical protein  
NspA02\_00349 Sensor histidine kinase AruS protein  
NspA02\_00350 glutamine synthetase protein  
NspA02\_00351 metal dependent phosphohydrolase protein  
NspA02\_00352 putative lipoprotein  
NspA02\_00354 Photosystem I assembly protein ycf3  
NspA02\_00355 Transposase protein  
NspA02\_00356 RNA polymerase-associated protein RapA  
NspA02\_00357 ATP-dependent DNA helicase PcrA protein  
NspA02\_00358 Modification methylase BabI protein  
NspA02\_00359 type III restriction enzyme res subunit protein  
NspA02\_00360 hypothetical protein  
NspA02\_00361 NAD+ kinase protein  
NspA02\_00362 two-component response regulator protein  
NspA02\_00363 hypothetical protein  
NspA02\_00364 MotA-TolQ-ExbB proton channel protein  
NspA02\_00365 Aerobic cobaltochelate subunit CobN protein  
NspA02\_00366 Putative transposase y4zB protein  
NspA02\_00367 hypothetical protein  
NspA02\_00368 putative addiction module antidote protein  
NspA02\_00369 death-on-curing family protein  
NspA02\_00370 hypothetical protein  
NspA02\_00371 Cyanobacterial phytochrome B protein  
NspA02\_00375 Photosystem I assembly protein ycf3  
NspA02\_00376 hypothetical protein  
NspA02\_00377 MOSC domain-containing protein  
NspA02\_00379 PQQ-like domain protein  
NspA02\_00380 hypothetical protein  
NspA02\_00381 putative manganese-dependent inorganic pyrophosphatase protein  
NspA02\_00382 hypothetical protein  
NspA02\_00383 hypothetical protein  
NspA02\_00384 hypothetical protein  
NspA02\_00386 glycosyltransferase protein  
NspA02\_00387 dolichol-phosphate mannosyltransferase protein  
NspA02\_00388 hypothetical protein  
NspA02\_00389 Vitamin B12 transporter BtuB protein

NspA02\_00390 transmembrane protein  
NspA02\_00391 two-component system NarL family sensor histidine kinase UhpB protein  
NspA02\_00395 Phosphate transport system permease protein PstA  
NspA02\_00396 Phosphate transport system permease protein PstC  
NspA02\_00397 phosphate binding protein  
NspA02\_00398 putative transposase protein  
NspA02\_00399 hypothetical protein  
NspA02\_00400 heme d1 biosynthesis protein  
NspA02\_00401 Secreted effector protein pipB2  
NspA02\_00402 Photosystem I assembly protein ycf3  
NspA02\_00403 hypothetical protein  
NspA02\_00404 hypothetical protein  
NspA02\_00405 lipoprotein  
NspA02\_00406 Helix-turn-helix domain protein  
NspA02\_00415 Protein of unknown function DUF115  
NspA02\_00418 putative flagellar hook-length control protein  
NspA02\_00420 Sensor protein ZraS  
NspA02\_00424 hypothetical protein  
NspA02\_00426 Photosystem I assembly protein ycf3  
NspA02\_00427 O-antigen polymerase protein  
NspA02\_00429 Extracellular endonuclease protein  
NspA02\_00430 hypothetical protein  
NspA02\_00433 hypothetical protein  
NspA02\_00441 Monofunctional biosynthetic peptidoglycan transglycosylase protein  
NspA02\_00443 hypothetical protein  
NspA02\_00445 hypothetical protein  
NspA02\_00446 hypothetical protein  
NspA02\_00448 Protein PilH  
NspA02\_00449 hypothetical protein  
NspA02\_00451 Protease HtpX protein  
NspA02\_00452 SH3 domain protein  
NspA02\_00458 Sec-independent protein translocase protein Tata  
NspA02\_00459 Lipid A 3-O-deacylase protein  
NspA02\_00464 hypothetical protein  
NspA02\_00469 Short domain protein  
NspA02\_00470 hypothetical protein  
NspA02\_00480 hypothetical protein  
NspA02\_00481 hypothetical protein  
NspA02\_00482 3'-5'-bisphosphate nucleotidase CysQ protein  
NspA02\_00483 hypothetical protein  
NspA02\_00485 hypothetical protein  
NspA02\_00487 CDP-diacylglycerol-glycerol-3-phosphate 3-phosphatidyltransferase protein  
NspA02\_00489 hypothetical protein  
NspA02\_00490 8-amino-7-oxononanoate synthase protein  
NspA02\_00491 fatty acid desaturase protein  
NspA02\_00492 MMPL domain containing protein  
NspA02\_00493 hypothetical protein  
NspA02\_00495 GIY-YIG catalytic domain-containing protein  
NspA02\_00498 hypothetical protein  
NspA02\_00499 Carboxypeptidase regulatory-like domain protein  
NspA02\_00502 hypothetical protein  
NspA02\_00504 Cell cycle protein GpsB  
NspA02\_00510 hypothetical protein  
NspA02\_00511 Putative toxin RelE4 protein  
NspA02\_00512 hypothetical protein  
NspA02\_00520 Glutaminase 2 protein  
NspA02\_00523 hypothetical protein  
NspA02\_00525 hypothetical protein  
NspA02\_00527 hypothetical protein  
NspA02\_00528 AsmA-like region protein  
NspA02\_00529 hypothetical protein  
NspA02\_00547 Archaeal glutamate synthase NADPH protein  
NspA02\_00549 outer membrane protein W  
NspA02\_00550 Inosine-5'-monophosphate dehydrogenase protein  
NspA02\_00551 Endonuclease III protein  
NspA02\_00552 hypothetical protein  
NspA02\_00553 hypothetical protein  
NspA02\_00554 protein-S-isoprenylcysteine O-methyltransferase  
NspA02\_00555 hypothetical protein  
NspA02\_00559 orotate phosphoribosyltransferase protein  
NspA02\_00560 hypothetical protein  
NspA02\_00561 BNR repeat-containing glycosyl hydrolase protein  
NspA02\_00562 CheC domain-containing protein  
NspA02\_00563 Chemotaxis protein methyltransferase 1  
NspA02\_00564 Chemotaxis protein CheY  
NspA02\_00571 chemotaxis protein motB Motility protein B  
NspA02\_00573 methyl-accepting chemotaxis sensory transducer protein  
NspA02\_00574 metal-dependent phosphohydrolase HDOD domain-containing protein  
NspA02\_00575 Chemotaxis protein CheY  
NspA02\_00576 putative ubiquinone biosynthesis protein UbiB  
NspA02\_00579 Cyanobacterial phytochrome A protein  
NspA02\_00580 Sporulation kinase C protein  
NspA02\_00585 ATP-dependent helicase-deoxyribonuclease subunit B protein  
NspA02\_00587 hypothetical protein  
NspA02\_00588 Cyanobacterial phytochrome B protein  
NspA02\_00589 Sensor protein ZraS  
NspA02\_00590 Alginate biosynthesis transcriptional regulatory protein AlgB  
NspA02\_00591 hypothetical protein  
NspA02\_00592 hypothetical protein

NspA02\_00594 Diguanylate cyclase DosC protein  
NspA02\_00595 hypothetical protein  
NspA02\_00598 Response regulator MprA protein  
NspA02\_00599 metal-dependent phosphohydrolase HDOD domain-containing protein  
NspA02\_00600 hypothetical protein  
NspA02\_00601 hypothetical protein  
NspA02\_00602 Inosine-5'-monophosphate dehydrogenase protein  
NspA02\_00604 hypothetical protein  
NspA02\_00605 Sensor protein GacS  
NspA02\_00606 putative peptidase protein  
NspA02\_00607 Glutaminase 2 protein  
NspA02\_00608 Positive alginate biosynthesis regulatory protein  
NspA02\_00614 hypothetical protein  
NspA02\_00615 hypothetical protein  
NspA02\_00616 hypothetical protein  
NspA02\_00617 ATP-binding protein  
NspA02\_00618 hypothetical protein  
NspA02\_00619 plasmid-like protein  
NspA02\_00620 hypothetical protein  
NspA02\_00621 Tyrosine recombinase XerC protein  
NspA02\_00622 VTC domain protein  
NspA02\_00623 hypothetical protein  
NspA02\_00624 ral secretion pathway protein H  
NspA02\_00625 type IV pilus minor pilin PilV protein  
NspA02\_00626 type IV pilus minor pilin PilW protein  
NspA02\_00627 PilX domain containing protein  
NspA02\_00628 hypothetical protein  
NspA02\_00629 TPR domain protein  
NspA02\_00630 hypothetical protein  
NspA02\_00631 sulfatase protein  
NspA02\_00632 Dolichyl-phosphate-mannose-protein domain containing protein  
NspA02\_00633 group 1 glycosyl transferase protein  
NspA02\_00634 Polysaccharide biosynthesis protein  
NspA02\_00635 starch synthase protein  
NspA02\_00636 Glycosyl hydrolase protein  
NspA02\_00637 CDP-diaclyglycerol-glycerol-3-phosphate 3-phosphatidyltransferase protein  
NspA02\_00638 glycoprotein 3-alpha-L-fucosyltransferase  
NspA02\_00639 beta-site APP-cleaving enzyme 2 memapsin 1 protein  
NspA02\_00640 sulfatase protein  
NspA02\_00641 putative cyclic pyranopterin monophosphate synthase protein  
NspA02\_00642 Undecaprenyl-phosphate 4-deoxy-4-formamido-L-arabinose transferase protein  
NspA02\_00643 group 1 glycosyl transferase protein  
NspA02\_00644 PRY3 protein  
NspA02\_00645 hypothetical protein  
NspA02\_00646 Sensor protein GacS  
NspA02\_00647 LexA repressor protein  
NspA02\_00648 hypothetical protein  
NspA02\_00649 hypothetical protein  
NspA02\_00650 hypothetical protein  
NspA02\_00651 hypothetical protein  
NspA02\_00654 hypothetical protein  
NspA02\_00656 Ribosomal RNA small subunit methyltransferase G protein  
NspA02\_00664 hypothetical protein  
NspA02\_00665 phage tail protein  
NspA02\_00666 Gp37Gp68 family protein  
NspA02\_00667 phage protein  
NspA02\_00668 hypothetical protein  
NspA02\_00669 Oligopeptide transport system permease protein OppC  
NspA02\_00671 Putative adenylate cyclase 3 protein  
NspA02\_00672 hypothetical protein  
NspA02\_00674 hypothetical protein  
NspA02\_00675 D-inositol 3-phosphate glycosyltransferase protein  
NspA02\_00676 Lipopolysaccharide core biosynthesis glycosyltransferase LpsD protein  
NspA02\_00677 hypothetical protein  
NspA02\_00682 3-deoxy-manno-octulosonate cytidyltransferase protein  
NspA02\_00683 Exopolysaccharide production protein PSS  
NspA02\_00684 GDP-mannose-dependent alpha--phosphatidylinositol mannosyltransferase protein  
NspA02\_00685 tol-pal system protein ybgf  
NspA02\_00686 Cysteine desulfurase protein  
NspA02\_00688 hypothetical protein  
NspA02\_00689 hypothetical protein  
NspA02\_00690 TraT complement resistance protein  
NspA02\_00691 cytochrome c class I protein  
NspA02\_00692 Seven time protein  
NspA02\_00693 Cytochrome b6 protein  
NspA02\_00694 Cytochrome b6-f complex iron-sulfur subunit protein  
NspA02\_00695 Plastocyanin protein  
NspA02\_00697 hypothetical protein  
NspA02\_00698 aliphatic sulfonates ABC transporter substrate-binding protein  
NspA02\_00699 Cyanobacterial phytochrome A protein  
NspA02\_00700 Tyrosine phenol-lyase protein  
NspA02\_00701 hypothetical protein  
NspA02\_00702 putative spermidine synthase protein  
NspA02\_00703 Undecaprenyl-phosphate 4-deoxy-4-formamido-L-arabinose transferase protein  
NspA02\_00704 Photosystem I assembly protein ycf3  
NspA02\_00705 hypothetical protein  
NspA02\_00706 FecR protein  
NspA02\_00707 hypothetical protein  
NspA02\_00708 Adenylate cyclase 1 protein

NspA02\_00709 Polar-differentiation response regulator DivK protein  
 NspA02\_00713 FlgN protein  
 NspA02\_00714 Peptidoglycan hydrolase FlgJ protein  
 NspA02\_00716 Ig domain-containing protein  
 NspA02\_00717 Ig-like domain protein  
 NspA02\_00719 Flagella basal body P-ring formation protein FlgA  
 NspA02\_00724 Nitrite oxidoreductase, beta subunit NxrB (missing in *N. gracilis*, but could be amplified by PCR; Luckner et al., 2013)  
 NspA02\_00729 hypothetical protein  
 NspA02\_00733 D-inositol 3-phosphate glycosyltransferase protein  
 NspA02\_00734 Cyanobacterial phytochrome A protein  
 NspA02\_00743 hypothetical protein  
 NspA02\_00746 cAMP receptor protein  
 NspA02\_00747 hypothetical protein  
 NspA02\_00751 leucine-rich-repeat type III effector protein  
 NspA02\_00752 Penicillin-binding protein 1A  
 NspA02\_00753 Penicillin-binding protein 1A  
 NspA02\_00757 hypothetical protein  
 NspA02\_00758 hypothetical protein  
 NspA02\_00764 PiIT protein-like protein  
 NspA02\_00765 hypothetical protein  
 NspA02\_00766 Cation efflux system protein CusA  
 NspA02\_00767 RND family metal ion efflux pump membrane fusion protein  
 NspA02\_00768 hypothetical protein  
 NspA02\_00769 carbohydrate-selective porin OprB protein  
 NspA02\_00770 hypothetical protein  
 NspA02\_00772 hypothetical protein  
 NspA02\_00774 thiamine kinase protein  
 NspA02\_00778 dolichol-phosphate mannosyltransferase protein  
 NspA02\_00779 multidrug resistance efflux pump-antipporter protein  
 NspA02\_00792 Periplasmic protein CpxP  
 NspA02\_00798 rhamnukinase protein  
 NspA02\_00799 tRNA uridine 5-carboxymethylaminomethyl modification enzyme MnmG protein  
 NspA02\_00800 ATPase protein  
 NspA02\_00801 Chemotaxis protein CheY  
 NspA02\_00802 Adenylate cyclase 1 protein  
 NspA02\_00804 Secreted effector protein pipB2  
 NspA02\_00807 hypothetical protein  
 NspA02\_00809 TPR repeat domain containing protein  
 NspA02\_00810 TPR domain-containing protein  
 NspA02\_00811 hypothetical protein  
 NspA02\_00812 hypothetical protein  
 NspA02\_00813 hypothetical protein  
 NspA02\_00814 methyl-CpG-binding domain protein  
 NspA02\_00816 Cyclic pyranopterin monophosphate synthase protein  
 NspA02\_00819 hypothetical protein  
 NspA02\_00822 Flagellar hook-length control FliK protein  
 NspA02\_00823 hypothetical protein  
 NspA02\_00824 flagellar basal body-associated protein FliI  
 NspA02\_00827 colicin V production protein  
 NspA02\_00829 hypothetical protein  
 NspA02\_00830 hypothetical protein  
 NspA02\_00837 menaquinol oxidoreductase complex Cbc5 cytochrome c subunit protein  
 NspA02\_00838 Short domain protein  
 NspA02\_00839 hypothetical protein  
 NspA02\_00840 hypothetical protein  
 NspA02\_00844 hypothetical protein  
 NspA02\_00845 Shufflon-specific DNA recombinase protein  
 NspA02\_00846 hypothetical protein  
 NspA02\_00847 DNA binding domain-containing protein  
 NspA02\_00848 replicative DNA helicase protein  
 NspA02\_00849 hypothetical protein  
 NspA02\_00850 hypothetical protein  
 NspA02\_00851 hypothetical protein  
 NspA02\_00852 nuclease protein  
 NspA02\_00853 hypothetical protein  
 NspA02\_00854 hypothetical protein  
 NspA02\_00855 hypothetical protein  
 NspA02\_00856 putative periplasmic serine endoprotease DegP protein  
 NspA02\_00862 hypothetical protein  
 NspA02\_00863 GDSL-like Lipase/Acylhydrolase protein  
 NspA02\_00864 hypothetical protein  
 NspA02\_00865 Flagellar motor switch protein FliG  
 NspA02\_00866 NADH-quinone oxidoreductase subunit N protein  
 NspA02\_00875 hypothetical protein  
 NspA02\_00876 hypothetical protein  
 NspA02\_00903 4-hydroxybenzoate octaprenyltransferase protein  
 NspA02\_00904 hypothetical protein  
 NspA02\_00907 hypothetical protein  
 NspA02\_00910 Nitrate transport ATP-binding protein NrtC NRT gene cluster  
 NspA02\_00911 Nitrate transport permease protein NrtB NRT gene cluster  
 NspA02\_00912 Nitrate transport ATP-binding protein NrtC NRT gene cluster  
 NspA02\_00913 hypothetical protein  
 NspA02\_00914 hypothetical protein  
 NspA02\_00915 Nitrite reductase, beta subunit (nirB) NIR gene cluster  
 NspA02\_00916 Nitrite reductase, delta subunit (nirD) NIR gene cluster  
 NspA02\_00920 Oxygen sensor histidine kinase NreB protein  
 NspA02\_00921 Response regulator GacA protein  
 NspA02\_00922 response regulator receiver protein  
 NspA02\_00923 Putative sensory transducer protein

NspA02\_00931 hypothetical protein  
NspA02\_00936 Radical SAM domain-containing protein  
NspA02\_00939 DNA methylase N-4-N-6 domain-containing protein  
NspA02\_00940 hypothetical protein  
NspA02\_00941 Alginate biosynthesis transcriptional regulatory protein AlgB  
NspA02\_00942 hypothetical protein  
NspA02\_00943 metal-dependent phosphohydrolase HDOD domain-containing protein  
NspA02\_00944 Sensor protein ZraS  
NspA02\_00945 Cyanobacterial phytochrome B protein  
NspA02\_00946 Glutathione peroxidase protein  
NspA02\_00947 hypothetical protein  
NspA02\_00951 Undecaprenyl-diphosphatase protein  
NspA02\_00955 Serine-threonine-protein kinase pkn1  
NspA02\_00957 hypothetical protein  
NspA02\_00958 tRNA-splicing ligase RtcB protein  
NspA02\_00959 IMP dehydrogenase protein  
NspA02\_00960 Toluene 12-dioxygenase system ferredoxin subunit protein  
NspA02\_00964 hypothetical protein  
NspA02\_00965 hypothetical protein  
NspA02\_00968 hypothetical protein  
NspA02\_00969 peptidase C14 caspase catalytic subunit p20 protein  
NspA02\_00970 hypothetical protein  
NspA02\_00972 PD-D/EXK nuclease superfamily protein  
NspA02\_00973 FOG TPR repeat containing protein  
NspA02\_00976 glycosylphosphatidylinositol phospholipase D protein  
NspA02\_00983 TPR repeat domain containing protein  
NspA02\_00988 putative transposase protein  
NspA02\_00989 transposase protein  
NspA02\_00990 ADP-heptose-LPS heptosyltransferase 2 protein  
NspA02\_00991 Cyclic pyranopterin monophosphate synthase protein  
NspA02\_00992 3-demethylubiquinone-9 3-methyltransferase protein  
NspA02\_00993 Biotin synthase 2 protein  
NspA02\_00994 glycoprotein 3-alpha-L-fucosyltransferase  
NspA02\_00995 Toluene 12-dioxygenase electron transfer component protein  
NspA02\_00996 Fe-S oxidoreductase protein  
NspA02\_00997 putative cyclic pyranopterin monophosphate synthase protein  
NspA02\_00998 TetR family transcriptional regulator protein  
NspA02\_00999 hypothetical protein  
NspA02\_01003 Glutaminase 1 protein  
NspA02\_01006 hypothetical protein  
NspA02\_01009 mRNA interferase MazF2 protein  
NspA02\_01010 hypothetical protein  
NspA02\_01011 DNA polymerase III subunit alpha protein  
NspA02\_01016 dolichol-phosphate mannosyltransferase protein  
NspA02\_01017 4-hydroxybenzoate octaprenyltransferase protein  
NspA02\_01018 hypothetical protein  
NspA02\_01020 Chemotaxis protein CheY  
NspA02\_01021 inhibitor of MCP methylation CheC-like protein  
NspA02\_01022 Chemotaxis response regulator protein-glutamate methyltransferase  
NspA02\_01023 hypothetical protein  
NspA02\_01027 hypothetical protein  
NspA02\_01028 Polar-differentiation response regulator DivK protein  
NspA02\_01029 PilZ domain protein  
NspA02\_01030 hypothetical protein  
NspA02\_01034 hypothetical protein  
NspA02\_01037 hypothetical protein  
NspA02\_01038 response regulator receiver protein  
NspA02\_01039 Response regulator MprA protein  
NspA02\_01040 Transcriptional regulatory protein OmpR  
NspA02\_01041 Type 4 fimbriae expression regulatory protein PflR  
NspA02\_01042 Histidine kinase-DNA gyrase B- protein  
NspA02\_01043 hypothetical protein  
NspA02\_01044 Type II secretion system protein E  
NspA02\_01045 hypothetical protein  
NspA02\_01046 Response regulator MprA protein  
NspA02\_01047 Response regulator MprA protein  
NspA02\_01048 DNA gyrase subunit A protein  
NspA02\_01051 hypothetical protein  
NspA02\_01052 hypothetical protein  
NspA02\_01053 GDSL-like Lipase/Acylhydrolase protein  
NspA02\_01056 ATP-dependent DNA helicase PcrA protein  
NspA02\_01059 hypothetical protein  
NspA02\_01060 Phenylalanine--tRNA ligase alpha subunit protein  
NspA02\_01061 TPR repeat domain containing protein  
NspA02\_01062 hypothetical protein  
NspA02\_01063 TPR repeat domain containing protein  
NspA02\_01064 Putative adenylate cyclase 3 protein  
NspA02\_01070 Exodeoxyribonuclease 7 large subunit protein  
NspA02\_01071 hypothetical protein  
NspA02\_01073 hypothetical protein  
NspA02\_01083 glycosyl transferase family protein  
NspA02\_01084 Putative sugar dehydratase-epimerase YfnG protein  
NspA02\_01085 Malonyl-acyl-carrier protein O-methyltransferase  
NspA02\_01086 tocopherol O-methyltransferase protein  
NspA02\_01087 hypothetical protein  
NspA02\_01088 glycosyltransferase protein  
NspA02\_01089 D-inositol 3-phosphate glycosyltransferase protein  
NspA02\_01090 group 1 glycosyl transferase protein  
NspA02\_01091 magnesium-protoporphyrin IX monomethyl ester cyclase protein

NspA02\_01092 3-demethylubiquinone-9 3-methyltransferase protein  
 NspA02\_01093 ISDvu4 transposase protein  
 NspA02\_01114 peptidase M15A protein  
 NspA02\_01116 hypothetical protein  
 NspA02\_01117 3-oxoacyl-acyl-carrier-protein reductase FabG  
 NspA02\_01126 methyl-accepting chemotaxis protein  
 NspA02\_01127 Motility protein B  
 NspA02\_01128 EH Signature domain protein  
 NspA02\_01129 DNA repair protein RAD50  
 NspA02\_01130 hypothetical protein  
 NspA02\_01131 hypothetical protein  
 NspA02\_01133 hypothetical protein  
 NspA02\_01135 Nitrogen regulatory protein P-II  
 NspA02\_01136 putative efflux pump membrane transporter SepB protein  
 NspA02\_01137 Cation efflux system protein CzcA  
 NspA02\_01138 membrane protein in asrC 5' region  
 NspA02\_01140 hypothetical protein  
 NspA02\_01141 Transposase InsF for insertion sequence IS3A protein  
 NspA02\_01148 8-amino-7-oxononanoate synthase protein  
 NspA02\_01150 Sensor protein GacS  
 NspA02\_01152 Protein of unknown function DUF115  
 NspA02\_01153 Protein of unknown function DUF115  
 NspA02\_01154 Adenylyl-sulfate kinase protein  
 NspA02\_01155 Undecaprenyl-phosphate 4-deoxy-4-formamido-L-arabinose transferase protein  
 NspA02\_01156 alcohol sulfotransferase protein  
 NspA02\_01157 hypothetical protein  
 NspA02\_01158 Chito oligosaccharide deacetylase protein  
 NspA02\_01159 anaerobic magnesium-protoporphyrin IX monomethyl ester cyclase protein  
 NspA02\_01160 Nodulation protein NolNO  
 NspA02\_01161 UDP-N-acetylglucosamine 2-epimerase protein  
 NspA02\_01162 hypothetical protein  
 NspA02\_01166 hypothetical protein  
 NspA02\_01167 hypothetical protein  
 NspA02\_01175 hypothetical protein  
 NspA02\_01176 hypothetical protein  
 NspA02\_01177 hypothetical protein  
 NspA02\_01178 Sensory rhodopsin II transducer protein  
 NspA02\_01182 hypothetical protein  
 NspA02\_01183 menaquinol oxidoreductase complex Cbc3 cytochrome c subunit protein  
 NspA02\_01184 glycosyltransferase protein  
 NspA02\_01186 putative multihem cytochrome c protein  
 NspA02\_01189 hypothetical protein  
 NspA02\_01190 anti-sigma-factor antagonist protein  
 NspA02\_01191 hypothetical protein  
 NspA02\_01192 hypothetical protein  
 NspA02\_01193 hypothetical protein  
 NspA02\_01194 Modification methylase MthTI protein  
 NspA02\_01195 hypothetical protein  
 NspA02\_01196 PD-D/EXK nuclease superfamily protein  
 NspA02\_01197 phosphomethylpyrimidine kinase protein  
 NspA02\_01198 hypothetical protein  
 NspA02\_01199 Leucine rich repeat domain containing protein  
 NspA02\_01200 ADP-ribosylation-crystallin J1 protein  
 NspA02\_01201 ATP-dependent Lon protease protein  
 NspA02\_01202 hypothetical protein  
 NspA02\_01203 transcriptional regulator protein  
 NspA02\_01204 bacteriophage protein  
 NspA02\_01205 hypothetical protein  
 NspA02\_01208 AAA ATPase domain protein  
 NspA02\_01213 Alginate biosynthesis transcriptional regulatory protein AlgB  
 NspA02\_01214 hypothetical protein  
 NspA02\_01217 Photosystem I assembly protein ycf3  
 NspA02\_01219 hypothetical protein  
 NspA02\_01223 Flagellar motor switch protein FlIG  
 NspA02\_01224 N-6 Adenine-specific DNA methylase protein  
 NspA02\_01225 helicase domain-containing protein  
 NspA02\_01226 hypothetical protein  
 NspA02\_01227 Helix-turn-helix domain protein  
 NspA02\_01228 hypothetical protein  
 NspA02\_01229 hypothetical protein  
 NspA02\_01230 hypothetical protein  
 NspA02\_01231 type I restriction enzyme r fragment n term motif protein  
 NspA02\_01232 Virulence-associated protein A'  
 NspA02\_01233 Periplasmic nitrate reductase protein NAP gene cluster (napA)  
 NspA02\_01234 Periplasmic nitrate reductase electron transfer subunit protein NAP gene cluster (napB)  
 NspA02\_01235 Cytochrome NAP gene cluster (napC)  
 NspA02\_01236 Cytochrome b6-f complex iron-sulfur subunit protein NAP gene cluster (putative napG, with 1 signal P on the N terminus, and a transmembrane spanni  
 NspA02\_01237 Cytochrome bc complex cytochrome b subunit protein NAP gene cluster (putative napH with four transmembrane spanning regions)  
 NspA02\_01238 Cytochrome b protein NAP gene cluster (napL, with two transmembrane spanning regions)  
 NspA02\_01239 GYD domain protein  
 NspA02\_01240 NapC-NirT family cytochrome c protein  
 NspA02\_01241 cytochrome c protein  
 NspA02\_01242 HIRAN domain protein  
 NspA02\_01243 prophage MuMc02 S24 family peptidase protein  
 NspA02\_01244 hypothetical protein  
 NspA02\_01250 hypothetical protein  
 NspA02\_01251 phosphoribosyl 12-cyclic phosphate phosphodiesterase protein  
 NspA02\_01252 hypothetical protein  
 NspA02\_01253 hypothetical protein

NspA02\_01254 hypothetical protein  
 NspA02\_01255 Photosystem I assembly protein ycf3  
 NspA02\_01256 glycosyl transferase family protein  
 NspA02\_01257 hypothetical protein  
 NspA02\_01258 Acetoin utilization protein AcuC  
 NspA02\_01259 Virulence-associated protein I  
 NspA02\_01260 killer suppression protein HigA  
 NspA02\_01268 hypothetical protein  
 NspA02\_01270 L-24-diaminobutyric acid acetyltransferase protein Ectoine/hydroxyectoine biosynthesis  
 NspA02\_01271 Diaminobutyrate--2-oxoglutarate transaminase protein Ectoine/hydroxyectoine biosynthesis  
 NspA02\_01272 L-ectoine synthase protein Ectoine/hydroxyectoine biosynthesis  
 NspA02\_01273 Ectoine hydroxylase protein Ectoine/hydroxyectoine biosynthesis  
 NspA02\_01274 putative amino-acid ABC transporter periplasmic-binding protein y4tE related ectoine ABC-type transporter  
 NspA02\_01275 putative amino-acid ABC transporter permease protein y4tF related ectoine ABC-type transporter  
 NspA02\_01276 putative amino-acid ABC transporter permease protein y4tG related ectoine ABC-type transporter  
 NspA02\_01278 Trans-aconitate 2-methyltransferase protein  
 NspA02\_01279 hypothetical protein  
 NspA02\_01281 hypothetical protein  
 NspA02\_01285 Macrolide export ATP-binding-permease protein MacB  
 NspA02\_01286 Macrolide export ATP-binding-permease protein MacB  
 NspA02\_01287 Macrolide export ATP-binding-permease protein MacB  
 NspA02\_01288 Macrolide-specific efflux protein MacA  
 NspA02\_01289 assembly protein  
 NspA02\_01290 Modification methylase HpaI protein  
 NspA02\_01291 hypothetical protein  
 NspA02\_01292 hypothetical protein  
 NspA02\_01295 PD-D/EXK nuclease superfamily protein  
 NspA02\_01298 hypothetical protein  
 NspA02\_01299 Tyrosine--tRNA ligase protein  
 NspA02\_01300 hypothetical protein  
 NspA02\_01301 hypothetical protein  
 NspA02\_01302 hypothetical protein  
 NspA02\_01304 hypothetical protein  
 NspA02\_01305 hypothetical protein  
 NspA02\_01306 cyclic nucleotide-binding protein  
 NspA02\_01307 Inosine-5'-monophosphate dehydrogenase protein  
 NspA02\_01313 hypothetical protein  
 NspA02\_01314 type IV pilus assembly protein PilM  
 NspA02\_01315 hypothetical protein  
 NspA02\_01316 msha biosis protein msho  
 NspA02\_01317 MshA pilin protein MshD  
 NspA02\_01318 methylation protein  
 NspA02\_01319 hypothetical protein  
 NspA02\_01320 hypothetical protein  
 NspA02\_01321 30S ribosomal protein S13  
 NspA02\_01326 magnesium-protoporphyrin IX monomethyl ester cyclase protein  
 NspA02\_01329 TPR domain-containing protein  
 NspA02\_01330 hypothetical protein  
 NspA02\_01332 hypothetical protein  
 NspA02\_01339 hypothetical protein  
 NspA02\_01340 Cyanobacterial phytochrome B protein  
 NspA02\_01341 Phosphate regulon transcriptional regulatory protein PhoB  
 NspA02\_01349 hypothetical protein  
 NspA02\_01350 protein phosphoaspartate phosphatase CheX associated with MCPs of classes 40H  
 NspA02\_01351 CBS domain protein  
 NspA02\_01352 hypothetical protein  
 NspA02\_01353 Virulence-associated protein A  
 NspA02\_01354 putative transposase protein  
 NspA02\_01355 Sensor protein SrrB  
 NspA02\_01356 Inosine-5'-monophosphate dehydrogenase protein  
 NspA02\_01357 Transcriptional regulatory protein FixJ  
 NspA02\_01359 AAA domain protein  
 NspA02\_01360 DNA replication protein  
 NspA02\_01361 hypothetical protein  
 NspA02\_01362 hypothetical protein  
 NspA02\_01370 Succinate dehydrogenase flavoprotein subunit  
 NspA02\_01371 hypothetical protein  
 NspA02\_01372 TPR repeat-containing protein  
 NspA02\_01373 hypothetical protein  
 NspA02\_01374 hypothetical protein  
 NspA02\_01375 hypothetical protein  
 NspA02\_01376 sodium-proline symporter protein  
 NspA02\_01378 Leucine--tRNA ligase protein  
 NspA02\_01382 hypothetical protein  
 NspA02\_01383 two-component system NarL family sensor histidine kinase BarA protein  
 NspA02\_01384 Response regulator MprA protein  
 NspA02\_01385 hypothetical protein  
 NspA02\_01386 hypothetical protein  
 NspA02\_01387 AAA-like domain protein  
 NspA02\_01388 hypothetical protein  
 NspA02\_01389 hypothetical protein  
 NspA02\_01390 Tetratricopeptide repeat domain containing protein  
 NspA02\_01396 PAS-PAC sensor hybrid histidine kinase protein  
 NspA02\_01402 Chemotaxis response regulator protein-glutamate methyltransferase 1  
 NspA02\_01403 metal-dependent phosphohydrolase HDOD domain-containing protein  
 NspA02\_01404 Chemotaxis protein methyltransferase 1  
 NspA02\_01405 Transcriptional regulatory protein WalR  
 NspA02\_01406 Sensory rhodopsin II transducer protein  
 NspA02\_01407 hypothetical protein



NspA02\_01411 Alginate biosynthesis protein AlgK  
NspA02\_01412 ATP-dependent DNA helicase UvrD1 protein  
NspA02\_01415 cyclic nucleotide-binding protein  
NspA02\_01416 protease I protein  
NspA02\_01417 hypothetical protein  
NspA02\_01418 polypeptide N-acetylglucosaminyltransferase protein  
NspA02\_01419 D-inositol 3-phosphate glycosyltransferase protein  
NspA02\_01420 GIY-YIG catalytic domain protein  
NspA02\_01421 transposase protein  
NspA02\_01427 TPR-repeat-containing protein  
NspA02\_01428 HAMP domain protein  
NspA02\_01429 hypothetical protein  
NspA02\_01430 copper-binding protein  
NspA02\_01434 Chaperone protein DnaJ  
NspA02\_01435 hypothetical protein  
NspA02\_01437 hypothetical protein  
NspA02\_01443 Foldase protein PrsA  
NspA02\_01449 hypothetical protein  
NspA02\_01450 hypothetical protein  
NspA02\_01451 Bacteriohemerythrin protein  
NspA02\_01452 Sensor protein FixL  
NspA02\_01455 hypothetical protein  
NspA02\_01456 Sensor protein FixL  
NspA02\_01457 Sensor protein kinase Walk  
NspA02\_01458 Phosphate regulon transcriptional regulatory protein PhoB  
NspA02\_01461 hypothetical protein  
NspA02\_01462 hypothetical protein  
NspA02\_01465 putative cyclic pyranopterin monophosphate synthase protein  
NspA02\_01466 Putative dihydroflavonol-4-reductase protein  
NspA02\_01467 magnesium-protoporphyrin IX monomethyl ester cyclase protein  
NspA02\_01468 integrase catalytic region protein  
NspA02\_01469 transposase of ISGsu3 IS5 family protein  
NspA02\_01470 Coenzyme PQQ synthesis protein E  
NspA02\_01471 Oxidoreductase UcpA protein  
NspA02\_01472 putative cyclic pyranopterin monophosphate synthase protein  
NspA02\_01473 Bifunctional purine biosynthesis protein PurH  
NspA02\_01475 hypothetical protein  
NspA02\_01476 hypothetical protein  
NspA02\_01478 outer membrane efflux protein  
NspA02\_01479 hypothetical protein  
NspA02\_01480 hypothetical protein  
NspA02\_01484 putative two-component sensor histidine kinase protein  
NspA02\_01485 hypothetical protein  
NspA02\_01486 PD-D/EXK nuclease superfamily protein  
NspA02\_01487 Tyrosine recombinase XerC protein  
NspA02\_01488 hypothetical protein  
NspA02\_01489 Acetylornithine aminotransferase protein  
NspA02\_01492 hypothetical protein  
NspA02\_01494 hypothetical protein  
NspA02\_01496 Oxygen sensor histidine kinase NreB protein  
NspA02\_01497 LexA repressor protein  
NspA02\_01503 Foldase protein PrsA  
NspA02\_01505 adenine-specific DNA methyltransferase protein  
NspA02\_01506 hypothetical protein  
NspA02\_01507 hypothetical protein  
NspA02\_01508 hypothetical protein  
NspA02\_01509 metallo beta lactamase SLH domain-containing protein  
NspA02\_01510 transcriptional regulator protein  
NspA02\_01511 hypothetical protein  
NspA02\_01512 Ribbon-helix-helix protein  
NspA02\_01513 putative transposase orfA for insertion sequence element protein  
NspA02\_01514 HTH-like domain protein  
NspC22\_00006 GDP-mannose 46-dehydratase protein  
NspC22\_00008 Transketolase protein  
NspC22\_00009 1-deoxy-D-xylulose-5-phosphate synthase 2 protein  
NspC22\_00061 hypothetical protein  
NspC22\_00064 hypothetical protein  
NspC22\_00065 hypothetical protein  
NspC22\_00068 Putative N-acetylmuramoyl-L-alanine amidase YrvJ protein  
NspC22\_00070 hypothetical protein  
NspC22\_00077 hypothetical protein  
NspC22\_00079 metal dependent phosphohydrolase protein  
NspC22\_00085 oxygen-independent coproporphyrinogen III oxidase protein  
NspC22\_00096 putative plasmid-partitioning protein ParA  
NspC22\_00097 ATP-dependent DNA helicase RecG protein  
NspC22\_00101 Plasmid stabilization system protein  
NspC22\_00102 protein parD  
NspC22\_00103 Serine-threonine-protein kinase pkn1  
NspC22\_00104 TPR repeat domain containing protein  
NspC22\_00107 Nucleotidyltransferase substrate binding like protein  
NspC22\_00115 Leucine Rich repeat domain containing protein  
NspC22\_00116 type III effector protein  
NspC22\_00117 Cytochrome C oxidasecb3-type protein  
NspC22\_00119 hypothetical protein  
NspC22\_00120 hypothetical protein  
NspC22\_00122 two-component system chemotaxis family CheB-CheR fusion protein  
NspC22\_00128 Endonuclease III protein  
NspC22\_00130 Tetratricopeptide repeat domain containing protein  
NspC22\_00132 hypothetical protein

NspC22\_00133 N-acetylmuramoyl-L-alanine amidase CwlM protein  
NspC22\_00138 regulator of sigma E protease protein  
NspC22\_00143 Adenylate cyclase protein  
NspC22\_00146 Protein AmpG  
NspC22\_00150 Protein YdeP  
NspC22\_00151 TPR repeat domain containing protein  
NspC22\_00152 Oxygen tolerance protein  
NspC22\_00153 BatC protein  
NspC22\_00154 Lipoprotein Nlpl  
NspC22\_00157 Cyanobacterial phytochrome B protein  
NspC22\_00195 hypothetical protein  
NspC22\_00197 Mrr restriction system protein  
NspC22\_00198 putative transcriptional regulator protein  
NspC22\_00199 addiction module killer protein  
NspC22\_00220 sphingosine kinase protein  
NspC22\_00231 hypothetical protein  
NspC22\_00236 Protein TonB  
NspC22\_00238 putative cobalt-precorrin-6Y C-methyltransferase decarboxylating protein  
NspC22\_00240 hypothetical protein  
NspC22\_00242 Cobalamin biosynthesis protein CobD  
NspC22\_00243 Putative threonine-phosphate decarboxylase protein  
NspC22\_00251 CCA-adding enzyme protein  
NspC22\_00253 hypothetical protein  
NspC22\_00255 Cyanobacterial phytochrome B protein  
NspC22\_00261 hypothetical protein  
NspC22\_00293 dolichol-phosphate mannosyltransferase protein  
NspC22\_00294 hypothetical protein  
NspC22\_00297 Putative dihydroflavonol-4-reductase protein  
NspC22\_00298 undecaprenyl-phosphate 4-deoxy-4-formamido-L-arabinose transferase protein  
NspC22\_00299 glycosyl transferase family protein  
NspC22\_00300 dolichol-phosphate mannosyltransferase protein  
NspC22\_00301 D-inositol 3-phosphate glycosyltransferase protein  
NspC22\_00302 hypothetical protein  
NspC22\_00303 hypothetical protein  
NspC22\_00304 methyltransferase protein  
NspC22\_00306 S23 ribosomal protein  
NspC22\_00308 putative cyclic pyranopterin monophosphate synthase protein  
NspC22\_00309 dolichol-phosphate mannosyltransferase protein  
NspC22\_00310 Tetratricopeptide repeat domain containing protein  
NspC22\_00311 dolichol-phosphate mannosyltransferase protein  
NspC22\_00312 Coenzyme PQQ synthesis protein E  
NspC22\_00313 hypothetical protein  
NspC22\_00314 Methyltransferase domain protein  
NspC22\_00315 NHL repeat containing protein  
NspC22\_00321 hypothetical protein  
NspC22\_00322 Integrase-recombinase protein  
NspC22\_00324 Metallothiol transferase FosB protein  
NspC22\_00326 hypothetical protein  
NspC22\_00328 hypothetical protein  
NspC22\_00335 anaerobic magnesium-protoporphyrin IX monomethyl ester cyclase protein  
NspC22\_00339 oxalate decarboxylase protein  
NspC22\_00343 hypothetical protein  
NspC22\_00344 Peptidoglycan-associated lipoprotein  
NspC22\_00346 Type V secretory pathway adhesin AidA protein  
NspC22\_00352 Alcohol dehydrogenase cytochrome c subunit protein  
NspC22\_00353 hypothetical protein  
NspC22\_00371 Sensor protein kinase Walk  
NspC22\_00388 hypothetical protein  
NspC22\_00390 B12 binding domain protein  
NspC22\_00391 hypothetical protein  
NspC22\_00392 B12 binding domain protein  
NspC22\_00394 geranylgeranyl reductase protein  
NspC22\_00437 hypothetical protein  
NspC22\_00442 hypothetical protein  
NspC22\_00460 radical sam domain-containing protein  
NspC22\_00462 Nitrate-nitrite sensor protein NarX  
NspC22\_00463 Response regulator GacA protein  
NspC22\_00464 Spermidine synthase protein  
NspC22\_00465 DNA-binding CopG-like domain-containing protein  
NspC22\_00466 Putative toxin Y4kP protein  
NspC22\_00467 hypothetical protein  
NspC22\_00484 NAD+ kinase protein  
NspC22\_00493 hypothetical protein  
NspC22\_00494 putative periplasmic serine endoprotease DegP protein  
NspC22\_00495 putative periplasmic serine endoprotease DegP protein  
NspC22\_00496 putative periplasmic serine endoprotease DegP protein  
NspC22\_00500 FOG TPR repeat containing protein  
NspC22\_00509 hypothetical protein  
NspC22\_00514 cyclic nucleotide-binding protein  
NspC22\_00519 hypothetical protein  
NspC22\_00520 peptidoglycan-binding protein LysM  
NspC22\_00521 50S ribosomal protein L34  
NspC22\_00527 hypothetical protein  
NspC22\_00528 hypothetical protein  
NspC22\_00529 PA14 domain-containing protein  
NspC22\_00530 hypothetical protein  
NspC22\_00534 hypothetical protein  
NspC22\_00535 hypothetical protein  
NspC22\_00536 DNA methyltransferase protein

NspC22\_00537 DNA polymerase subunit beta protein  
NspC22\_00538 putative toxin-antitoxin system antitoxin component protein  
NspC22\_00542 hypothetical protein  
NspC22\_00543 hypothetical protein  
NspC22\_00556 Cysteine synthase B protein  
NspC22\_00557 thiosulfate dehydrogenase quinone small subunit protein  
NspC22\_00558 Virulence-associated protein I  
NspC22\_00559 plasmid maintenance system killer protein  
NspC22\_00561 Protein of unknown function DUF115  
NspC22\_00564 hypothetical protein  
NspC22\_00572 Guanylate kinase protein  
NspC22\_00575 hypothetical protein  
NspC22\_00576 Cyclic nucleotide-binding domain signature 1 protein  
NspC22\_00577 hypothetical protein  
NspC22\_00578 PII family protein  
NspC22\_00579 hypothetical protein  
NspC22\_00580 hypothetical protein  
NspC22\_00586 D-inositol 3-phosphate glycosyltransferase 2 protein  
NspC22\_00587 TolC family type I secretion outer membrane protein  
NspC22\_00593 Multicopper oxidase protein  
NspC22\_00594 Putative beta-lactamase HcpC protein  
NspC22\_00595 Type 4 fimbriae expression regulatory protein PilR  
NspC22\_00596 hypothetical protein  
NspC22\_00597 Transcriptional regulatory protein AruR  
NspC22\_00598 hypothetical protein  
NspC22\_00599 protein kinase cGMP-dependent  
NspC22\_00600 Crp-Fnr family transcriptional regulator protein  
NspC22\_00606 Cyclic pyranopterin monophosphate synthase protein  
NspC22\_00612 Inosine-5'-monophosphate dehydrogenase protein  
NspC22\_00613 Archaeal glutamate synthase NADPH protein  
NspC22\_00652 phosphonate ABC transporter periplasmic phosphonate-binding protein  
NspC22\_00653 Cyanobacterial phytochrome A protein  
NspC22\_00654 dGTPase protein  
NspC22\_00655 hypothetical protein  
NspC22\_00661 hypothetical protein  
NspC22\_00663 Spermidine synthase 1 protein  
NspC22\_00689 hypothetical protein  
NspC22\_00693 HNH endonuclease protein  
NspC22\_00694 N-6 DNA Methylase protein  
NspC22\_00716 AsmA-like region protein  
NspC22\_00745 hypothetical protein  
NspC22\_00751 hypothetical protein  
NspC22\_00754 regulatory protein ArsR  
NspC22\_00756 Transcriptional regulatory protein ZraR  
NspC22\_00757 hypothetical protein  
NspC22\_00758 Cyclic nucleotide-binding domain signature 2 protein  
NspC22\_00794 hypothetical protein  
NspC22\_00810 euchromatic histone-lysine N-methyltransferase protein  
NspC22\_00816 hypothetical protein  
NspC22\_00817 Modification methylase HinfI protein  
NspC22\_00819 hypothetical protein  
NspC22\_00823 hypothetical protein  
NspC22\_00826 hypothetical protein  
NspC22\_00831 putative periplasmic serine endoprotease DegP protein  
NspC22\_00832 CheC inhibitor of MCP methylation protein  
NspC22\_00833 Nitrogen regulation protein NtrB  
NspC22\_00834 Chemotaxis protein CheY  
NspC22\_00855 mRNA interferase MazF protein  
NspC22\_00856 Antitoxin MazE protein  
NspC22\_00857 PHP domain-containing protein  
NspC22\_00861 hypothetical protein  
NspC22\_00901 hypothetical protein  
NspC22\_00918 Peptidyl-prolyl cis-trans isomerase A protein  
NspC22\_00926 hypothetical protein  
NspC22\_00927 Foldase protein PrsA  
NspC22\_00932 Cyclic nucleotide-binding domain signature 2 protein  
NspC22\_00933 Cyclic nucleotide-gated potassium channel RHE CH03180 protein  
NspC22\_00934 cAMP receptor protein  
NspC22\_00935 hypothetical protein  
NspC22\_00937 AsmA domain containing protein  
NspC22\_00938 putative oxaloacetate decarboxylase gamma chain protein  
NspC22\_00945 hypothetical protein  
NspC22\_00946 hypothetical protein  
NspC22\_00951 Membrane-bound lytic murein transglycosylase A protein  
NspC22\_00974 Cytochrome c3 protein  
NspC22\_00980 Transposase protein  
NspC22\_01006 Putative zinc-finger protein  
NspC22\_01007 Putative sensory transducer protein YvaQ  
NspC22\_01008 Sensor protein kinase Walk  
NspC22\_01009 hypothetical protein  
NspC22\_01010 Tetrathionate reductase subunit B protein  
NspC22\_01011 Hdr-like menaquinol oxidoreductase integral membrane subunit protein  
NspC22\_01012 Thiosulfate reductase protein  
NspC22\_01013 hypothetical protein  
NspC22\_01014 transposase for insertion sequence NGRIS-20g protein  
NspC22\_01015 Ribonuclease VapC1 protein  
NspC22\_01016 hypothetical protein  
NspC22\_01017 transposase for insertion sequence NGRIS-20g protein  
NspC22\_01019 Sulfoxide reductase catalytic subunit YedY protein

|              |                                                                   |                    |
|--------------|-------------------------------------------------------------------|--------------------|
| NspC22_01020 | Serine-threonine-protein kinase pkn1                              |                    |
| NspC22_01021 | hypothetical protein                                              |                    |
| NspC22_01022 | hypothetical protein                                              |                    |
| NspC22_01027 | hypothetical protein                                              |                    |
| NspC22_01031 | hypothetical protein                                              |                    |
| NspC22_01062 | hypothetical protein                                              |                    |
| NspC22_01065 | Modification methylase HpaI protein                               |                    |
| NspC22_01068 | glutaredoxin protein                                              |                    |
| NspC22_01071 | tRNA -methyltransferase protein                                   |                    |
| NspC22_01073 | 15-anhydro-D-fructose reductase protein                           |                    |
| NspC22_01080 | lipopolysaccharide ABC transporter periplasmic protein LptA       |                    |
| NspC22_01081 | Lipopolysaccharide-assembly domain containing protein             |                    |
| NspC22_01085 | Chemotaxis response regulator protein-glutamate methyltransferase |                    |
| NspC22_01086 | Repeat domain in VibrioColwellia protein                          |                    |
| NspC22_01088 | hypothetical protein                                              |                    |
| NspC22_01091 | Photosystem I assembly protein ycf3                               |                    |
| NspC22_01092 | hypothetical protein                                              |                    |
| NspC22_01097 | Type 4 prepilin-like protein leader peptide-processing enzyme     |                    |
| NspC22_01098 | hypothetical protein                                              |                    |
| NspC22_01099 | Photosystem I assembly protein ycf3                               |                    |
| NspC22_01100 | hypothetical protein                                              |                    |
| NspC22_01104 | 4-alpha-glucanotransferase protein                                |                    |
| NspC22_01105 | alpha-D-glucan 1-alpha-D-glucosylmutase protein                   |                    |
| NspC22_01106 | transposase protein                                               |                    |
| NspC22_01107 | hypothetical protein                                              |                    |
| NspC22_01120 | hypothetical protein                                              |                    |
| NspC22_01171 | Cyanobacterial phytochrome A protein                              |                    |
| NspC22_01172 | Type 4 fimbriae expression regulatory protein PilR                |                    |
| NspC22_01173 | outer membrane efflux protein                                     |                    |
| NspC22_01174 | putative metal ion efflux outer membrane family protein           |                    |
| NspC22_01175 | Cation efflux system protein CusB                                 |                    |
| NspC22_01176 | Putative cation efflux system protein SiIA                        |                    |
| NspC22_01177 | cation diffusion facilitator family transporter protein           |                    |
| NspC22_01179 | mercuric transport protein selenocysteine-containing              |                    |
| NspC22_01180 | hypothetical protein                                              |                    |
| NspC22_01181 | Mercuric transport protein periplasmic component                  | Mercury resistance |
| NspC22_01182 | heavy metal transport-detoxification protein                      | Mercury resistance |
| NspC22_01183 | Putative MetA-pathway of phenol degradation protein               | Mercury resistance |
| NspC22_01184 | NHL repeat containing protein                                     | Mercury resistance |
| NspC22_01185 | Mercuric resistance operon regulatory protein                     | Mercury resistance |
| NspC22_01188 | Mercuric transport protein                                        | Mercury resistance |
| NspC22_01189 | Mercuric reductase protein                                        | Mercury resistance |
| NspC22_01190 | alkylmercury lyase protein                                        | Mercury resistance |
| NspC22_01191 | Serine-threonine-protein kinase pkn1                              |                    |
| NspC22_01192 | Inosine-5'-monophosphate dehydrogenase protein                    |                    |
| NspC22_01202 | hypothetical protein                                              |                    |
| NspC22_01208 | type II site-specific deoxyribonuclease protein                   |                    |
| NspC22_01209 | Modification methylase SmaI protein                               |                    |
| NspC22_01210 | DNA methylase N-4-N-6 domain-containing protein                   |                    |
| NspC22_01212 | Dolichyl-phosphate-mannose-protein domain containing protein      |                    |
| NspC22_01215 | hypothetical protein                                              |                    |
| NspC22_01216 | GDSL-like Lipase/Acylhydrolase protein                            |                    |
| NspC22_01218 | Transcriptional regulatory protein FixJ                           |                    |
| NspC22_01219 | TPR repeat domain containing protein                              |                    |
| NspC22_01220 | Inosine-5'-monophosphate dehydrogenase protein                    |                    |
| NspC22_01221 | Protease HtpX protein                                             |                    |
| NspC22_01222 | Putative heavy-metal-binding protein                              |                    |
| NspC22_01223 | Putative heavy-metal-binding protein                              |                    |
| NspC22_01224 | hypothetical protein                                              |                    |
| NspC22_01225 | type II secretion system protein D signal peptide                 |                    |
| NspC22_01230 | tubulin-FtsZ GTPase protein                                       |                    |
| NspC22_01238 | Sulfatase-modifying factor enzyme 1 protein                       |                    |
| NspC22_01239 | putative GMP synthase glutamine-hydrolyzing protein               |                    |
| NspC22_01240 | Alginate biosynthesis transcriptional regulatory protein AlgB     |                    |
| NspC22_01241 | hypothetical protein                                              |                    |
| NspC22_01252 | Poly-beta-16-N-acetyl-D-glucosamine synthase protein              |                    |
| NspC22_01254 | periplasmic trypsin-like serine protease DegP protein             |                    |
| NspC22_01257 | nucleotidyltransferase protein                                    |                    |
| NspC22_01258 | DNA polymerase subunit beta protein                               |                    |
| NspC22_01270 | Inositol-1-monophosphatase protein                                |                    |
| NspC22_01274 | hypothetical protein                                              |                    |
| NspC22_01275 | VacJ family lipoprotein                                           |                    |
| NspC22_01276 | hypothetical protein                                              |                    |
| NspC22_01280 | hypothetical protein                                              |                    |
| NspC22_01289 | hypothetical protein                                              |                    |
| NspC22_01290 | binding protein                                                   |                    |
| NspC22_01291 | 25-diketo-D-gluconic acid reductase A protein                     |                    |
| NspC22_01292 | Transcriptional regulatory protein SrrA                           |                    |
| NspC22_01322 | NAD-dependent malic enzyme protein                                |                    |
| NspC22_01323 | hypothetical protein                                              |                    |
| NspC22_01324 | hypothetical protein                                              |                    |
| NspC22_01325 | FG-GAP repeat domain containing protein                           |                    |
| NspC22_01329 | Cyanobacterial phytochrome A protein                              |                    |
| NspC22_01335 | hypothetical protein                                              |                    |
| NspC22_01337 | putative restriction endonuclease protein                         |                    |
| NspC22_01346 | Virulence-associated protein I                                    |                    |
| NspC22_01347 | plasmid maintenance system killer protein                         |                    |
| NspC22_01349 | B-type flagellar hook-associated protein 2                        |                    |
| NspC22_01352 | MnxG protein cupredoxin domain-containing protein                 |                    |

NspC22\_01355 Energy-coupling factor transporter transmembrane protein EcFt  
 NspC22\_01357 Quinone oxidoreductase protein  
 NspC22\_01359 phosphohistidine phosphatase SixA protein  
 NspC22\_01366 hypothetical protein  
 NspC22\_01373 Glutamate-1-semialdehyde 21-aminomutase 2 protein  
 NspC22\_01377 Aspartate-semialdehyde dehydrogenase protein  
 NspC22\_01379 3-isopropylmalate dehydrogenase protein  
 NspC22\_01380 putative nitrate reductase subunit gamma protein  
 NspC22\_01412 5-formyltetrahydrofolate cyclo-ligase protein  
 NspC22\_01414 2'3'-cyclic-nucleotide 2'-phosphodiesterase protein  
 NspC22\_01421 14-alpha-glucan branching enzyme GlgB protein  
 NspC22\_01422 hypothetical protein  
 NspC22\_01431 hypothetical protein  
 NspC22\_01448 hypothetical protein  
 NspC22\_01457 RND family efflux transporter MFP subunit protein  
 NspC22\_01458 **alkylphosphonate ABC transporter protein**  
 NspC22\_01461 putative integral membrane protein  
 NspC22\_01462 fibronectin type III protein  
 NspC22\_01463 putative lipoprotein  
 NspC22\_01470 hypothetical protein  
 NspC22\_01471 hypothetical protein  
 NspC22\_01472 cytoplasmic protein  
 NspC22\_01473 hypothetical protein  
 NspC22\_01474 hypothetical protein  
 NspC22\_01475 DEAD-DEAH box helicase protein  
 NspC22\_01476 hypothetical protein  
 NspC22\_01488 Cyanobacterial phytochrome A protein  
 NspC22\_01489 hypothetical protein  
 NspC22\_01490 CotH protein  
 NspC22\_01491 hypothetical protein  
 NspC22\_01492 hypothetical protein  
 NspC22\_01505 two-component system chemotaxis family CheB-CheR fusion protein  
 NspC22\_01516 Ribosomal RNA large subunit methyltransferase M protein  
 NspC22\_01517 hypothetical protein  
 NspC22\_01523 Hydrogenase expression-formation protein HypD  
 NspC22\_01524 hypothetical protein  
 NspC22\_01525 magnesium-protoporphyrin IX monomethyl ester cyclase protein  
 NspC22\_01526 ubiquinone-menaquinone biosynthesis methyltransferase protein  
 NspC22\_01527 hypothetical protein  
 NspC22\_01528 putative cyclic pyranopterin monophosphate synthase protein  
 NspC22\_01529 hypothetical protein  
 NspC22\_01530 Cyclic pyranopterin monophosphate synthase protein  
 NspC22\_01531 radical SAM domain-containing protein  
 NspC22\_01532 Ketoacyl reductase HetN protein  
 NspC22\_01533 UDP-N-acetylglucosamine 46-dehydratase protein  
 NspC22\_01534 B12 binding -radical SAM domain-containing protein  
 NspC22\_01538 hypothetical protein  
 NspC22\_01546 hypothetical protein  
 NspC22\_01547 Restriction endonuclease Defense protein  
 NspC22\_01548 trans-aconitate 2-methyltransferase protein  
 NspC22\_01549 hypothetical protein  
 NspC22\_01550 RNA polymerase-associated protein RapA  
 NspC22\_01553 Putative aspartate aminotransferase YhdR protein  
 NspC22\_01560 GMP synthase glutamine-hydrolyzing protein  
 NspC22\_01561 hypothetical protein  
 NspC22\_01570 hypothetical protein  
 NspC22\_01571 Lipoprotein NlpI  
 NspC22\_01572 LPP20 lipoprotein  
 NspC22\_01573 CHAT domain protein  
 NspC22\_01574 hypothetical protein  
 NspC22\_01575 RNA polymerase ECF-type sigma factor protein  
 NspC22\_01587 Serine-rich adhesin for platelet protein  
 NspC22\_01588 Collagen triple helix repeat domain containing protein  
 NspC22\_01589 hypothetical protein  
 NspC22\_01590 Cold shock-like protein CspE  
 NspC22\_01591 hypothetical protein  
 NspC22\_01592 Type II secretion system protein E  
 NspC22\_01602 NADH-quinone oxidoreductase subunit H 1 protein  
 NspC22\_01603 metal-dependent phosphoesterase protein  
 NspC22\_01604 hypothetical protein  
 NspC22\_01608 hypothetical protein  
 NspC22\_01610 adenine specific DNA methyltransferase protein  
 NspC22\_01611 putative signal-transduction protein containing cAMP-binding protein  
 NspC22\_01612 Molybdenum import ATP-binding protein ModC  
 NspC22\_01614 Molybdate-binding periplasmic protein  
 NspC22\_01618 metal-dependent phosphohydrolase HDOD domain-containing protein  
 NspC22\_01620 hypothetical protein  
 NspC22\_01621 putative cytochrome c protein  
 NspC22\_01622 hypothetical protein  
 NspC22\_01623 Hydrogen peroxide-inducible s activator protein  
 NspC22\_01627 putative multihem cytochrome c protein  
 NspC22\_01628 **Nitrate-nitrite sensor protein NarQ**  
 NspC22\_01630 anaerobic magnesium-protoporphyrin IX monomethyl ester cyclase protein  
 NspC22\_01634 zinc finger SWIM domain-containing protein  
 NspC22\_01635 adenosine tRNA methylthiotransferase MiaB protein  
 NspC22\_01645 Aspartyl-glutamyl-tRNA amidotransferase subunit B protein  
 NspC22\_01648 hypothetical protein  
 NspC22\_01651 pheromone shutdown protein  
 NspC22\_01652 hypothetical protein

NspC22\_01661 MnxG protein cupredoxin domain-containing protein  
NspC22\_01662 RNA polymerase sigma-H factor protein  
NspC22\_01664 Phytanoyl-CoA dioxygenase protein  
NspC22\_01665 putative lipoprotein  
NspC22\_01666 hypothetical protein  
NspC22\_01667 putative multihem cytochrome c protein  
NspC22\_01668 euchromatic histone-lysine N-methyltransferase protein  
NspC22\_01669 Ankyrin repeat domain containing protein  
NspC22\_01670 hypothetical protein  
NspC22\_01671 putative cytochrome c protein  
NspC22\_01673 YeeE-YedE family protein  
NspC22\_01674 sulfur transport protein  
NspC22\_01675 hypothetical protein  
NspC22\_01677 hypothetical protein  
NspC22\_01691 Type II secretion system protein  
NspC22\_01692 fimbrial assembly family protein  
NspC22\_01693 Type II secretion system protein K  
NspC22\_01694 ral secretion pathway protein J  
NspC22\_01695 ral secretion pathway protein I  
NspC22\_01696 hypothetical protein  
NspC22\_01700 helicase domain-containing protein  
NspC22\_01701 putative helicase protein  
NspC22\_01702 hypothetical protein  
NspC22\_01704 hypothetical protein  
NspC22\_01705 hypothetical protein  
NspC22\_01708 hypothetical protein  
NspC22\_01709 hypothetical protein  
NspC22\_01710 Leucine Rich repeat domain containing protein  
NspC22\_01714 PAS-PAC sensor-containing diguanylate cyclase-phosphodiesterase protein  
NspC22\_01715 Phosphate-selective porin O protein  
NspC22\_01718 hypothetical protein  
NspC22\_01725 hypothetical protein  
NspC22\_01726 Serine-threonine-protein kinase pkn1  
NspC22\_01727 NLP-P60 protein  
NspC22\_01728 hypothetical protein  
NspC22\_01729 hypothetical protein  
NspC22\_01730 fumarylacetoacetate hydrolase family protein  
NspC22\_01731 BadM-Rrf2 family transcriptional regulator protein  
NspC22\_01732 Iron-sulfur cluster repair protein Ytfe  
NspC22\_01733 hypothetical protein  
NspC22\_01734 Trk system potassium uptake protein TrkH  
NspC22\_01735 Ion transport protein  
NspC22\_01736 phosphate sensor histidine kinase HAMP protein  
NspC22\_01738 SprA-related domain containing protein  
NspC22\_01739 hypothetical protein  
NspC22\_01740 curli production assembly-transport component CsgG protein  
NspC22\_01741 Membrane-bound lytic murein transglycosylase F protein  
NspC22\_01743 Putative transposase y4zB protein  
NspC22\_01744 Fic/DOC domain containing protein

---
