# Supplementary material for: Diversification and niche adaptations of Nitrospina-like bacteria in the polyextreme interfaces of Red Sea brines
Source: PubMed Central journal article supplement — ISME J. 2015 Dec 11;10(6):1383–99. doi: 10.1038/ismej.2015.214 (PMC5029188; doi:10.1038/ismej.2015.214), 2015-12-11
Supplement: ismej2015214x19.pdf [file ismej2015214x19.pdf]

**Table S9A.** Transporters in the genome of *Nitrospina gracilis*.

| Function | TC | ORF ID     | Family ID | Transporter Family                                                                                  | Subfamily       |
|----------|----|------------|-----------|-----------------------------------------------------------------------------------------------------|-----------------|
| 2.A.63   |    | Ngra_00005 | CPA3      | The Monovalent Cation (K+ or Na+):Proton Antiporter-3 (CPA3) Family                                 | MnhA            |
| 2.A.6    |    | Ngra_00015 | RND       | The Resistance-Nodulation-Cell Division (RND) Superfamily                                           | HAE1            |
| 3.A.1    |    | Ngra_00071 | ABC       | The ATP-binding Cassette (ABC) Superfamily                                                          | binding         |
| 3.A.1    |    | Ngra_00074 | ABC       | The ATP-binding Cassette (ABC) Superfamily                                                          | binding         |
| 3.A.1    |    | Ngra_00075 | ABC       | The ATP-binding Cassette (ABC) Superfamily                                                          | membrane        |
| 3.A.1    |    | Ngra_00076 | ABC       | The ATP-binding Cassette (ABC) Superfamily                                                          | binding         |
| 2.A.52   |    | Ngra_00111 | NiCoT     | The Ni2+-Co2+ Transporter (NiCoT) Family                                                            |                 |
| 2.A.86   |    | Ngra_00114 | AI-2E     | The Autoinducer-2 Exporter (AI-2E) Family (Formerly the PerM Family, TC #9.B.22)                    |                 |
| 3.A.11   |    | Ngra_00140 | DNA-T     | The Bacterial Competence-related DNA Transformation Transporter (DNA-T) Family                      |                 |
| 9.A.4    |    | Ngra_00183 | YggT      | The YggT or Fanciful K+ Uptake-B (FkuB; YggT) Family                                                |                 |
| 3.A.1    |    | Ngra_00201 | ABC       | The ATP-binding Cassette (ABC) Superfamily                                                          | membrane        |
| 3.A.1    |    | Ngra_00202 | ABC       | The ATP-binding Cassette (ABC) Superfamily                                                          | ABC             |
| 3.A.1    |    | Ngra_00204 | ABC       | The ATP-binding Cassette (ABC) Superfamily                                                          | membrane        |
| 3.A.1    |    | Ngra_00220 | ABC       | The ATP-binding Cassette (ABC) Superfamily                                                          | binding         |
| 3.A.1    |    | Ngra_00221 | ABC       | The ATP-binding Cassette (ABC) Superfamily                                                          | binding         |
| 3.A.1    |    | Ngra_00224 | ABC       | The ATP-binding Cassette (ABC) Superfamily                                                          | membrane        |
| 3.A.1    |    | Ngra_00226 | ABC       | The ATP-binding Cassette (ABC) Superfamily                                                          | membrane        |
| 3.A.1    |    | Ngra_00227 | ABC       | The ATP-binding Cassette (ABC) Superfamily                                                          | binding         |
| 1.A.30   |    | Ngra_00261 | Mot/Exb   | The H+ or Na+-translocating Bacterial Flagellar Motor 1ExbD Outer Membrane Transport Energizer (Mo) |                 |
| 1.A.30   |    | Ngra_00262 | Mot/Exb   | The H+ or Na+-translocating Bacterial Flagellar Motor 1ExbD Outer Membrane Transport Energizer (Mo) |                 |
| 2.A.1    |    | Ngra_00292 | MFS       | The Major Facilitator Superfamily (MFS)                                                             |                 |
| 2.A.41   |    | Ngra_00322 | CNT       | The Concentrative Nucleoside Transporter (CNT) Family                                               |                 |
| 2.A.6    |    | Ngra_00361 | RND       | The Resistance-Nodulation-Cell Division (RND) Superfamily                                           | HAE1            |
| 2.A.53   |    | Ngra_00369 | SulP      | The Sulfate Permease (SulP) Family                                                                  |                 |
| 2.A.21   |    | Ngra_00395 | SSS       | The Solute:Sodium Symporter (SSS) Family                                                            |                 |
| 2.A.21   |    | Ngra_00399 | SSS       | The Solute:Sodium Symporter (SSS) Family                                                            |                 |
| 2.A.22   |    | Ngra_00400 | NSS       | The Neurotransmitter:Sodium Symporter (NSS) Family                                                  |                 |
| 3.A.1    |    | Ngra_00401 | ABC       | The ATP-binding Cassette (ABC) Superfamily                                                          | binding         |
| 3.A.1    |    | Ngra_00402 | ABC       | The ATP-binding Cassette (ABC) Superfamily                                                          | membrane        |
| 2.A.1    |    | Ngra_00427 | MFS       | The Major Facilitator Superfamily (MFS)                                                             |                 |
| 3.A.1    |    | Ngra_00480 | ABC       | The ATP-binding Cassette (ABC) Superfamily                                                          | binding         |
| 3.A.1    |    | Ngra_00481 | ABC       | The ATP-binding Cassette (ABC) Superfamily                                                          | membrane        |
| 3.A.1    |    | Ngra_00482 | ABC       | The ATP-binding Cassette (ABC) Superfamily                                                          | membrane        |
| 2.A.4    |    | Ngra_00486 | CDF       | The Cation Diffusion Facilitator (CDF) Family                                                       |                 |
| 9.A.19   |    | Ngra_00494 | MgtE      | The Mg2+ Transporter-E (MgtE) Family                                                                |                 |
| 9.A.19   |    | Ngra_00495 | MgtE      | The Mg2+ Transporter-E (MgtE) Family                                                                |                 |
| 1.A.23   |    | Ngra_00496 | MscS      | The Small Conductance Mechanosensitive Ion Channel (MscS) Family                                    |                 |
| 2.A.21   |    | Ngra_00505 | SSS       | The Solute:Sodium Symporter (SSS) Family                                                            |                 |
| 2.A.21   |    | Ngra_00510 | SSS       | The Solute:Sodium Symporter (SSS) Family                                                            |                 |
| 2.A.7    |    | Ngra_00541 | DMT       | The Drug/Metabolite Transporter (DMT) Superfamily                                                   |                 |
| 3.A.1    |    | Ngra_00544 | ABC       | The ATP-binding Cassette (ABC) Superfamily                                                          | membrane        |
| 3.A.1    |    | Ngra_00545 | ABC       | The ATP-binding Cassette (ABC) Superfamily                                                          | binding protein |
| 3.A.1    |    | Ngra_00546 | ABC       | The ATP-binding Cassette (ABC) Superfamily                                                          | binding         |
| 2.A.63   |    | Ngra_00568 | CPA3      | The Monovalent Cation (K+ or Na+):Proton Antiporter-3 (CPA3) Family                                 | MnhE            |
| 2.A.63   |    | Ngra_00569 | CPA3      | The Monovalent Cation (K+ or Na+):Proton Antiporter-3 (CPA3) Family                                 | MnhF            |
| 2.A.63   |    | Ngra_00570 | CPA3      | The Monovalent Cation (K+ or Na+):Proton Antiporter-3 (CPA3) Family                                 | MnhG            |
| 2.A.63   |    | Ngra_00571 | CPA3      | The Monovalent Cation (K+ or Na+):Proton Antiporter-3 (CPA3) Family                                 | MnhB            |
| 2.A.63   |    | Ngra_00572 | CPA3      | The Monovalent Cation (K+ or Na+):Proton Antiporter-3 (CPA3) Family                                 |                 |
| 2.A.63   |    | Ngra_00573 | CPA3      | The Monovalent Cation (K+ or Na+):Proton Antiporter-3 (CPA3) Family                                 | MnhC            |
| 2.A.63   |    | Ngra_00574 | CPA3      | The Monovalent Cation (K+ or Na+):Proton Antiporter-3 (CPA3) Family                                 | MnhD            |
| 2.A.63   |    | Ngra_00575 | CPA3      | The Monovalent Cation (K+ or Na+):Proton Antiporter-3 (CPA3) Family                                 | MnhA            |
| 2.A.63   |    | Ngra_00576 | CPA3      | The Monovalent Cation (K+ or Na+):Proton Antiporter-3 (CPA3) Family                                 | MnhA            |
| 2.A.15   |    | Ngra_00583 | BCCT      | The Betaine/Carnitine/Choline Transporter (BCCT) Family                                             |                 |
| 2.A.44   |    | Ngra_00605 | FNT       | The Formate-Nitrite Transporter (FNT) Family                                                        |                 |
| 2.A.66   |    | Ngra_00610 | MOP       | The Multidrug/Oligosaccharidyl-lipid/Polysaccharide (MOP) Flippase Superfamily                      | MVF             |
| 3.A.1    |    | Ngra_00632 | ABC       | The ATP-binding Cassette (ABC) Superfamily                                                          | membrane        |
| 3.A.1    |    | Ngra_00633 | ABC       | The ATP-binding Cassette (ABC) Superfamily                                                          | binding         |
| 2.A.36   |    | Ngra_00693 | CPA1      | The Monovalent Cation:Proton Antiporter-1 (CPA1) Family                                             |                 |
| 3.A.1    |    | Ngra_00700 | ABC       | The ATP-binding Cassette (ABC) Superfamily                                                          | membrane        |
| 3.A.1    |    | Ngra_00701 | ABC       | The ATP-binding Cassette (ABC) Superfamily                                                          | binding         |
| 2.A.6    |    | Ngra_00705 | RND       | The Resistance-Nodulation-Cell Division (RND) Superfamily                                           | HME             |
| 3.A.1    |    | Ngra_00725 | ABC       | The ATP-binding Cassette (ABC) Superfamily                                                          | membrane        |
| 3.A.1    |    | Ngra_00851 | ABC       | The ATP-binding Cassette (ABC) Superfamily                                                          | binding         |
| 3.A.1    |    | Ngra_00852 | ABC       | The ATP-binding Cassette (ABC) Superfamily                                                          | membrane        |
| 3.A.1    |    | Ngra_00853 | ABC       | The ATP-binding Cassette (ABC) Superfamily                                                          | membrane        |
| 3.A.1    |    | Ngra_00854 | ABC       | The ATP-binding Cassette (ABC) Superfamily                                                          | binding protein |
| 3.A.1    |    | Ngra_00861 | ABC       | The ATP-binding Cassette (ABC) Superfamily                                                          | binding         |
| 3.A.7    |    | Ngra_00880 | IVSP      | The Type IV (Conjugal DNA-Protein Transfer or VirB) Secretory Pathway (IVSP) Family                 |                 |
| 2.A.9    |    | Ngra_00893 | Oxa1      | The Cytochrome Oxidase Biogenesis (Oxa1) Family                                                     |                 |
| 3.A.5    |    | Ngra_00898 | IISP      | The Type II (General) Secretory Pathway (IISP) Family                                               |                 |
| 3.A.15   |    | Ngra_00902 | MTB       | The Outer Membrane Protein Secreting Main Terminal Branch (MTB)                                     |                 |
| 2.A.21   |    | Ngra_00903 | SSS       | The Solute:Sodium Symporter (SSS) Family                                                            |                 |
| 1.A.11   |    | Ngra_00926 | Amt       | The Ammonia Transporter Channel (Amt) Family                                                        |                 |
| 2.A.37   |    | Ngra_00927 | CPA2      | The Monovalent Cation:Proton Antiporter-2 (CPA2) Family                                             |                 |
| 3.A.15   |    | Ngra_00935 | MTB       | The Outer Membrane Protein Secreting Main Terminal Branch (MTB)                                     |                 |
| 2.A.1    |    | Ngra_00938 | MFS       | The Major Facilitator Superfamily (MFS)                                                             |                 |
| 3.A.1    |    | Ngra_00982 | ABC       | The ATP-binding Cassette (ABC) Superfamily                                                          | binding         |
| 3.A.10   |    | Ngra_01029 | H+-PPase  | The H+-translocating Pyrophosphatase (H+-PPase) Family                                              |                 |
| 2.A.64   |    | Ngra_01042 | Tat       | The Twin Arginine Targeting (Tat) Family                                                            |                 |
| 2.A.53   |    | Ngra_01051 | SulP      | The Sulfate Permease (SulP) Family                                                                  |                 |
| 3.A.1    |    | Ngra_01069 | ABC       | The ATP-binding Cassette (ABC) Superfamily                                                          | ABC+ membrane   |
| 2.A.7    |    | Ngra_01127 | DMT       | The Drug/Metabolite Transporter (DMT) Superfamily                                                   |                 |
| 2.A.67   |    | Ngra_01128 | OPT       | The Oligopeptide Transporter (OPT) Family                                                           |                 |
| 2.A.67   |    | Ngra_01129 | OPT       | The Oligopeptide Transporter (OPT) Family                                                           |                 |
| 2.A.33   |    | Ngra_01131 | NhaA      | The NhaA Na+:H+ Antiporter (NhaA) Family                                                            |                 |
| 9.A.30   |    | Ngra_01134 | TerC      | The Tellurium Ion Resistance (TerC) Family                                                          |                 |
| 3.A.3    |    | Ngra_01145 | P-ATPase  | The P-type ATPase (P-ATPase) Superfamily                                                            |                 |
| 2.A.21   |    | Ngra_01171 | SSS       | The Solute:Sodium Symporter (SSS) Family                                                            |                 |
| 2.A.25   |    | Ngra_01251 | AGCS      | The Alanine or Glycine:Cation Symporter (AGCS) Family                                               |                 |
| 3.A.1    |    | Ngra_01259 | ABC       | The ATP-binding Cassette (ABC) Superfamily                                                          | binding         |
| 3.A.1    |    | Ngra_01277 | ABC       | The ATP-binding Cassette (ABC) Superfamily                                                          | binding protein |
| 2.A.36   |    | Ngra_01305 | CPA1      | The Monovalent Cation:Proton Antiporter-1 (CPA1) Family                                             |                 |
| 3.A.1    |    | Ngra_01318 | ABC       | The ATP-binding Cassette (ABC) Superfamily                                                          | binding         |
| 2.A.21   |    | Ngra_01432 | SSS       | The Solute:Sodium Symporter (SSS) Family                                                            |                 |
| 3.A.1    |    | Ngra_01435 | ABC       | The ATP-binding Cassette (ABC) Superfamily                                                          | membrane        |
| 3.A.1    |    | Ngra_01436 | ABC       | The ATP-binding Cassette (ABC) Superfamily                                                          | binding         |

|        |            |            |                                                                                                                                |                 |
|--------|------------|------------|--------------------------------------------------------------------------------------------------------------------------------|-----------------|
| 3.A.6  | Ngra_01470 | IIISP      | The Type III (Virulence-related) Secretory Pathway (IIISP) Family                                                              |                 |
| 2.A.28 | Ngra_01516 | BASS       | The Bile Acid:Na <sup>+</sup> Symporter (BASS) Family                                                                          |                 |
| 3.A.1  | Ngra_01529 | ABC        | The ATP-binding Cassette (ABC) Superfamily                                                                                     | binding         |
| 3.A.1  | Ngra_01530 | ABC        | The ATP-binding Cassette (ABC) Superfamily                                                                                     | binding         |
| 1.A.30 | Ngra_01534 | Mot/Exb    | The H <sup>+</sup> - or Na <sup>+</sup> -translocating Bacterial Flagellar Motor 1ExbBD Outer Membrane Transport Energizer (Mo |                 |
| 1.A.30 | Ngra_01535 | Mot/Exb    | The H <sup>+</sup> - or Na <sup>+</sup> -translocating Bacterial Flagellar Motor 1ExbBD Outer Membrane Transport Energizer (Mo |                 |
| 2.A.4  | Ngra_01547 | CDF        | The Cation Diffusion Facilitator (CDF) Family                                                                                  |                 |
| 3.A.1  | Ngra_01552 | ABC        | The ATP-binding Cassette (ABC) Superfamily                                                                                     | binding         |
| 3.A.1  | Ngra_01553 | ABC        | The ATP-binding Cassette (ABC) Superfamily                                                                                     | binding protein |
| 3.A.1  | Ngra_01554 | ABC        | The ATP-binding Cassette (ABC) Superfamily                                                                                     | binding         |
| 3.A.1  | Ngra_01555 | ABC        | The ATP-binding Cassette (ABC) Superfamily                                                                                     | membrane        |
| 2.A.1  | Ngra_01594 | MFS        | The Major Facilitator Superfamily (MFS)                                                                                        |                 |
| 3.A.1  | Ngra_01622 | ABC        | The ATP-binding Cassette (ABC) Superfamily                                                                                     | binding         |
| 3.A.1  | Ngra_01632 | ABC        | The ATP-binding Cassette (ABC) Superfamily                                                                                     | binding         |
| 3.A.1  | Ngra_01633 | ABC        | The ATP-binding Cassette (ABC) Superfamily                                                                                     | binding         |
| 3.A.1  | Ngra_01668 | ABC        | The ATP-binding Cassette (ABC) Superfamily                                                                                     | membrane        |
| 3.A.1  | Ngra_01669 | ABC        | The ATP-binding Cassette (ABC) Superfamily                                                                                     | membrane        |
| 3.A.1  | Ngra_01671 | ABC        | The ATP-binding Cassette (ABC) Superfamily                                                                                     | binding         |
| 3.A.1  | Ngra_01686 | ABC        | The ATP-binding Cassette (ABC) Superfamily                                                                                     | binding         |
| 3.A.1  | Ngra_01687 | ABC        | The ATP-binding Cassette (ABC) Superfamily                                                                                     | membrane        |
| 2.A.1  | Ngra_01711 | MFS        | The Major Facilitator Superfamily (MFS)                                                                                        |                 |
| 3.A.1  | Ngra_01733 | ABC        | The ATP-binding Cassette (ABC) Superfamily                                                                                     | binding protein |
| 2.A.36 | Ngra_01762 | CPA1       | The Monovalent Cation:Proton Antiporter-1 (CPA1) Family                                                                        |                 |
| 2.A.53 | Ngra_01802 | SulP       | The Sulfate Permease (SulP) Family                                                                                             |                 |
| 1.A.30 | Ngra_01835 | Mot/Exb    | The H <sup>+</sup> - or Na <sup>+</sup> -translocating Bacterial Flagellar Motor 1ExbBD Outer Membrane Transport Energizer (Mo |                 |
| 3.A.1  | Ngra_01843 | ABC        | The ATP-binding Cassette (ABC) Superfamily                                                                                     | binding         |
| 2.A.47 | Ngra_01859 | DASS       | The Divalent Anion:Na <sup>+</sup> Symporter (DASS) Family                                                                     |                 |
| 1.A.46 | Ngra_01860 | Bestrophin | The Anion Channel-forming Bestrophin (Bestrophin) Family                                                                       |                 |
| 3.A.1  | Ngra_01887 | ABC        | The ATP-binding Cassette (ABC) Superfamily                                                                                     |                 |
| 9.A.19 | Ngra_01887 | MgtE       | The Mg <sup>2+</sup> Transporter-E (MgtE) Family                                                                               |                 |
| 2.A.40 | Ngra_01888 | NCS2       | The Nucleobase:Cation Symporter-2 (NCS2) Family                                                                                |                 |
| 2.A.6  | Ngra_01911 | RND        | The Resistance-Nodulation-Cell Division (RND) Superfamily                                                                      | SecDF           |
| 2.A.20 | Ngra_01940 | PIT        | The Inorganic Phosphate Transporter (PIT) Family                                                                               |                 |
| 1.A.30 | Ngra_01972 | Mot/Exb    | The H <sup>+</sup> - or Na <sup>+</sup> -translocating Bacterial Flagellar Motor 1ExbBD Outer Membrane Transport Energizer (Mo |                 |
| 1.A.23 | Ngra_01974 | MscS       | The Small Conductance Mechanosensitive Ion Channel (MscS) Family                                                               |                 |
| 2.A.7  | Ngra_02034 | DMT        | The Drug/Metabolite Transporter (DMT) Superfamily                                                                              | SMR             |
| 2.A.5  | Ngra_02049 | ZIP        | The Zinc (Zn <sup>2+</sup> )-Iron (Fe <sup>2+</sup> ) Permease (ZIP) Family                                                    |                 |
| 3.A.1  | Ngra_02050 | ABC        | The ATP-binding Cassette (ABC) Superfamily                                                                                     | ABC+ membrane   |
| 3.A.1  | Ngra_02051 | ABC        | The ATP-binding Cassette (ABC) Superfamily                                                                                     | binding         |
| 3.A.1  | Ngra_02052 | ABC        | The ATP-binding Cassette (ABC) Superfamily                                                                                     | ABC+ membrane   |
| 3.A.3  | Ngra_02091 | P-ATPase   | The P-type ATPase (P-ATPase) Superfamily                                                                                       |                 |
| 2.A.49 | Ngra_02094 | CIC        | The Chloride Carrier/Channel (CIC) Family                                                                                      |                 |
| 2.A.64 | Ngra_02097 | Tat        | The Twin Arginine Targeting (Tat) Family                                                                                       |                 |
| 2.A.63 | Ngra_02101 | GPA3       | The Monovalent Cation (K <sup>+</sup> or Na <sup>+</sup> ):Proton Antiporter-3 (CPA3) Family                                   | MnhA            |
| 1.B.6  | Ngra_02198 | OOP        | The OmpA-OmpF Porin (OOP) Family                                                                                               |                 |
| 1.A.30 | Ngra_02201 | Mot/Exb    | The H <sup>+</sup> - or Na <sup>+</sup> -translocating Bacterial Flagellar Motor 1ExbBD Outer Membrane Transport Energizer (Mo |                 |
| 2.A.69 | Ngra_02202 | AEC        | The Auxin Efflux Carrier (AEC) Family                                                                                          |                 |
| 3.A.1  | Ngra_02203 | ABC        | The ATP-binding Cassette (ABC) Superfamily                                                                                     | binding         |
| 3.A.1  | Ngra_02204 | ABC        | The ATP-binding Cassette (ABC) Superfamily                                                                                     | binding         |
| 3.A.1  | Ngra_02225 | ABC        | The ATP-binding Cassette (ABC) Superfamily                                                                                     | membrane        |
| 3.A.1  | Ngra_02226 | ABC        | The ATP-binding Cassette (ABC) Superfamily                                                                                     | binding         |
| 1.A.23 | Ngra_02240 | MscS       | The Small Conductance Mechanosensitive Ion Channel (MscS) Family                                                               |                 |
| 2.A.4  | Ngra_02245 | CDF        | The Cation Diffusion Facilitator (CDF) Family                                                                                  |                 |
| 2.A.6  | Ngra_02254 | RND        | The Resistance-Nodulation-Cell Division (RND) Superfamily                                                                      | HAE1            |
| 3.A.1  | Ngra_02268 | ABC        | The ATP-binding Cassette (ABC) Superfamily                                                                                     | membrane        |
| 3.A.1  | Ngra_02269 | ABC        | The ATP-binding Cassette (ABC) Superfamily                                                                                     | binding         |
| 3.A.1  | Ngra_02270 | ABC        | The ATP-binding Cassette (ABC) Superfamily                                                                                     | binding         |
| 3.A.1  | Ngra_02294 | ABC        | The ATP-binding Cassette (ABC) Superfamily                                                                                     | binding protein |
| 1.A.34 | Ngra_02304 | EVE1-C     | The Envelope Virus E1 Channel (EVE1-C) Family                                                                                  |                 |
| 9.A.40 | Ngra_02310 | HCC        | The HlyC/CorC (HCC) Family                                                                                                     |                 |
| 9.A.40 | Ngra_02311 | HCC        | The HlyC/CorC (HCC) Family                                                                                                     |                 |
| 3.A.1  | Ngra_02330 | ABC        | The ATP-binding Cassette (ABC) Superfamily                                                                                     | binding         |
| 3.A.1  | Ngra_02331 | ABC        | The ATP-binding Cassette (ABC) Superfamily                                                                                     | membrane        |
| 3.A.1  | Ngra_02332 | ABC        | The ATP-binding Cassette (ABC) Superfamily                                                                                     | membrane        |
| 9.A.19 | Ngra_02364 | MgtE       | The Mg <sup>2+</sup> Transporter-E (MgtE) Family                                                                               |                 |
| 3.A.1  | Ngra_02369 | ABC        | The ATP-binding Cassette (ABC) Superfamily                                                                                     | binding         |
| 3.A.1  | Ngra_02370 | ABC        | The ATP-binding Cassette (ABC) Superfamily                                                                                     | membrane        |
| 3.A.1  | Ngra_02371 | ABC        | The ATP-binding Cassette (ABC) Superfamily                                                                                     | membrane        |
| 3.A.1  | Ngra_02372 | ABC        | The ATP-binding Cassette (ABC) Superfamily                                                                                     | binding protein |
| 4.A    | Ngra_02380 | GPTS       | General PTS                                                                                                                    | Enzymel         |
| 4.A    | Ngra_02381 | SSPTS      | Sugar Specific PTS                                                                                                             | EnzymelIA       |
| 3.A.1  | Ngra_02384 | ABC        | The ATP-binding Cassette (ABC) Superfamily                                                                                     | binding         |
| 2.A.1  | Ngra_02413 | MFS        | The Major Facilitator Superfamily (MFS)                                                                                        |                 |
| 2.A.7  | Ngra_02414 | DMT        | The Drug/Metabolite Transporter (DMT) Superfamily                                                                              |                 |
| 3.A.1  | Ngra_02418 | ABC        | The ATP-binding Cassette (ABC) Superfamily                                                                                     | binding         |
| 3.A.1  | Ngra_02419 | ABC        | The ATP-binding Cassette (ABC) Superfamily                                                                                     | binding         |
| 3.A.1  | Ngra_02424 | ABC        | The ATP-binding Cassette (ABC) Superfamily                                                                                     | binding protein |
| 3.A.1  | Ngra_02480 | ABC        | The ATP-binding Cassette (ABC) Superfamily                                                                                     | binding         |
| 3.A.1  | Ngra_02481 | ABC        | The ATP-binding Cassette (ABC) Superfamily                                                                                     | membrane        |
| 2.A.64 | Ngra_02514 | Tat        | The Twin Arginine Targeting (Tat) Family                                                                                       |                 |
| 2.A.64 | Ngra_02531 | Tat        | The Twin Arginine Targeting (Tat) Family                                                                                       |                 |
| 1.B.17 | Ngra_02544 | OMF        | The Outer Membrane Factor (OMF) Family                                                                                         |                 |
| 3.A.1  | Ngra_02545 | ABC        | The ATP-binding Cassette (ABC) Superfamily                                                                                     | binding         |
| 3.A.1  | Ngra_02546 | ABC        | The ATP-binding Cassette (ABC) Superfamily                                                                                     | membrane        |
| 2.A.6  | Ngra_02593 | RND        | The Resistance-Nodulation-Cell Division (RND) Superfamily                                                                      | HME             |
| 2.A.66 | Ngra_02599 | MOP        | The Multidrug/Oligosaccharidyl-lipid/Polysaccharide (MOP) Flippase Superfamily                                                 | MVF             |
| 9.A.10 | Ngra_02604 | ILT        | The Iron/Lead Transporter (ILT) Superfamily                                                                                    |                 |
| 9.A.19 | Ngra_02613 | MgtE       | The Mg <sup>2+</sup> Transporter-E (MgtE) Family                                                                               |                 |
| 9.A.19 | Ngra_02614 | MgtE       | The Mg <sup>2+</sup> Transporter-E (MgtE) Family                                                                               |                 |
| 2.A.56 | Ngra_02654 | TRAP-T     | The Tripartite ATP-independent Periplasmic Transporter (TRAP-T) Family                                                         |                 |
| 2.A.56 | Ngra_02655 | TRAP-T     | The Tripartite ATP-independent Periplasmic Transporter (TRAP-T) Family                                                         |                 |
| 2.A.1  | Ngra_02724 | MFS        | The Major Facilitator Superfamily (MFS)                                                                                        |                 |
| 1.B.6  | Ngra_02725 | OOP        | The OmpA-OmpF Porin (OOP) Family                                                                                               |                 |
| 1.A.30 | Ngra_02727 | Mot/Exb    | The H <sup>+</sup> - or Na <sup>+</sup> -translocating Bacterial Flagellar Motor 1ExbBD Outer Membrane Transport Energizer (Mo |                 |
| 2.A.19 | Ngra_02742 | CaCa       | The Ca <sup>2+</sup> :Cation Antiporter (CaCa) Family                                                                          |                 |
| 2.A.1  | Ngra_02759 | MFS        | The Major Facilitator Superfamily (MFS)                                                                                        |                 |
| 2.A.23 | Ngra_02768 | DAACS      | The Dicarboxylate/Amino Acid:Cation (Na <sup>+</sup> or H <sup>+</sup> ) Symporter (DAACS) Family                              |                 |
| 2.A.64 | Ngra_02790 | Tat        | The Twin Arginine Targeting (Tat) Family                                                                                       |                 |
| 3.A.1  | Ngra_02796 | ABC        | The ATP-binding Cassette (ABC) Superfamily                                                                                     | binding         |

|        |            |          |                                                                                                                                 |                 |
|--------|------------|----------|---------------------------------------------------------------------------------------------------------------------------------|-----------------|
| 1.A.28 | Ngra_02814 | UT       | The Urea Transporter (UT) Family                                                                                                |                 |
| 3.A.1  | Ngra_02823 | ABC      | The ATP-binding Cassette (ABC) Superfamily                                                                                      | membrane        |
| 3.A.1  | Ngra_02824 | ABC      | The ATP-binding Cassette (ABC) Superfamily                                                                                      | membrane        |
| 3.A.1  | Ngra_02825 | ABC      | The ATP-binding Cassette (ABC) Superfamily                                                                                      | membrane        |
| 3.A.2  | Ngra_02829 | F-ATPase | The H <sup>+</sup> - or Na <sup>+</sup> -translocating F-type, V-type and A-type ATPase (F-ATPase) Superfamily                  |                 |
| 3.A.2  | Ngra_02830 | F-ATPase | The H <sup>+</sup> - or Na <sup>+</sup> -translocating F-type, V-type and A-type ATPase (F-ATPase) Superfamily                  |                 |
| 3.A.2  | Ngra_02831 | F-ATPase | The H <sup>+</sup> - or Na <sup>+</sup> -translocating F-type, V-type and A-type ATPase (F-ATPase) Superfamily                  |                 |
| 3.A.2  | Ngra_02832 | F-ATPase | The H <sup>+</sup> - or Na <sup>+</sup> -translocating F-type, V-type and A-type ATPase (F-ATPase) Superfamily                  |                 |
| 3.A.2  | Ngra_02833 | F-ATPase | The H <sup>+</sup> - or Na <sup>+</sup> -translocating F-type, V-type and A-type ATPase (F-ATPase) Superfamily                  |                 |
| 3.A.2  | Ngra_02834 | F-ATPase | The H <sup>+</sup> - or Na <sup>+</sup> -translocating F-type, V-type and A-type ATPase (F-ATPase) Superfamily                  |                 |
| 3.A.2  | Ngra_02835 | F-ATPase | The H <sup>+</sup> - or Na <sup>+</sup> -translocating F-type, V-type and A-type ATPase (F-ATPase) Superfamily                  |                 |
| 3.A.2  | Ngra_02836 | F-ATPase | The H <sup>+</sup> - or Na <sup>+</sup> -translocating F-type, V-type and A-type ATPase (F-ATPase) Superfamily                  |                 |
| 2.A.1  | Ngra_02858 | MFS      | The Major Facilitator Superfamily (MFS)                                                                                         |                 |
| 3.A.1  | Ngra_02862 | ABC      | The ATP-binding Cassette (ABC) Superfamily                                                                                      | membrane        |
| 3.A.1  | Ngra_02863 | ABC      | The ATP-binding Cassette (ABC) Superfamily                                                                                      | membrane        |
| 3.A.1  | Ngra_02864 | ABC      | The ATP-binding Cassette (ABC) Superfamily                                                                                      | binding         |
| 2.A.6  | Ngra_02888 | RND      | The Resistance-Nodulation-Cell Division (RND) Superfamily                                                                       | HAE3            |
| 2.A.56 | Ngra_02934 | TRAP-T   | The Tripartite ATP-independent Periplasmic Transporter (TRAP-T) Family                                                          |                 |
| 2.A.38 | Ngra_02941 | Trk      | The K <sup>+</sup> Transporter (Trk) Family                                                                                     |                 |
| 2.A.21 | Ngra_02967 | SSS      | The Solute:Sodium Symporter (SSS) Family                                                                                        |                 |
| 1.B.6  | Ngra_02984 | OOP      | The OmpA-OmpF Porin (OOP) Family                                                                                                |                 |
| 1.A.30 | Ngra_02985 | Mot/Exb  | The H <sup>+</sup> - or Na <sup>+</sup> -translocating Bacterial Flagellar Motor 1ExbBD Outer Membrane Transport Energizer (Mo) |                 |
| 2.A.1  | Ngra_02992 | MFS      | The Major Facilitator Superfamily (MFS)                                                                                         |                 |
| 3.A.6  | Ngra_03001 | IIISP    | The Type III (Virulence-related) Secretory Pathway (IIISP) Family                                                               |                 |
| 3.A.6  | Ngra_03002 | IIISP    | The Type III (Virulence-related) Secretory Pathway (IIISP) Family                                                               |                 |
| 3.A.6  | Ngra_03003 | IIISP    | The Type III (Virulence-related) Secretory Pathway (IIISP) Family                                                               |                 |
| 3.A.6  | Ngra_03004 | IIISP    | The Type III (Virulence-related) Secretory Pathway (IIISP) Family                                                               |                 |
| 3.A.6  | Ngra_03005 | IIISP    | The Type III (Virulence-related) Secretory Pathway (IIISP) Family                                                               |                 |
| 3.A.6  | Ngra_03006 | IIISP    | The Type III (Virulence-related) Secretory Pathway (IIISP) Family                                                               |                 |
| 1.A.11 | Ngra_03011 | Amt      | The Ammonia Transporter Channel (Amt) Family                                                                                    |                 |
| 2.A.47 | Ngra_03026 | DASS     | The Divalent Anion:Na <sup>+</sup> Symporter (DASS) Family                                                                      |                 |
| 2.A.56 | Ngra_03043 | TRAP-T   | The Tripartite ATP-independent Periplasmic Transporter (TRAP-T) Family                                                          |                 |
| 2.A.4  | Ngra_03072 | CDF      | The Cation Diffusion Facilitator (CDF) Family                                                                                   |                 |
| 3.A.1  | Ngra_03103 | ABC      | The ATP-binding Cassette (ABC) Superfamily                                                                                      | binding         |
| 3.A.1  | Ngra_03104 | ABC      | The ATP-binding Cassette (ABC) Superfamily                                                                                      | membrane        |
| 3.A.1  | Ngra_03105 | ABC      | The ATP-binding Cassette (ABC) Superfamily                                                                                      | membrane        |
| 3.A.1  | Ngra_03106 | ABC      | The ATP-binding Cassette (ABC) Superfamily                                                                                      | membrane        |
| 3.A.1  | Ngra_03107 | ABC      | The ATP-binding Cassette (ABC) Superfamily                                                                                      | binding protein |
| 2.A.7  | Ngra_03139 | DMT      | The Drug/Metabolite Transporter (DMT) Superfamily                                                                               | RarD            |
| 2.A.62 | Ngra_03144 | NhaD     | The NhaD Na <sup>+</sup> :H <sup>+</sup> Antiporter (NhaD) Family                                                               |                 |
| 1.A.23 | Ngra_03147 | MscS     | The Small Conductance Mechanosensitive Ion Channel (MscS) Family                                                                |                 |
| 2.A.63 | Ngra_03154 | CPA3     | The Monovalent Cation (K <sup>+</sup> or Na <sup>+</sup> ):Proton Antiporter-3 (CPA3) Family                                    | MnhA            |
| 3.A.15 | Ngra_03188 | MTB      | The Outer Membrane Protein Secreting Main Terminal Branch (MTB)                                                                 |                 |
| 3.A.1  | Ngra_03191 | ABC      | The ATP-binding Cassette (ABC) Superfamily                                                                                      | binding         |
| 3.A.1  | Ngra_03195 | ABC      | The ATP-binding Cassette (ABC) Superfamily                                                                                      | binding         |
| 3.A.1  | Ngra_03196 | ABC      | The ATP-binding Cassette (ABC) Superfamily                                                                                      | membrane        |
