# Supplementary material for: Diversification and niche adaptations of Nitrospina-like bacteria in the polyextreme interfaces of Red Sea brines
Source: PubMed Central journal article supplement — ISME J. 2015 Dec 11;10(6):1383–99. doi: 10.1038/ismej.2015.214 (PMC5029188; doi:10.1038/ismej.2015.214), 2015-12-11
Supplement: ismej2015214x20.pdf [file ismej2015214x20.pdf]

**Table S9B.** Transporters in the RS-SAGs (Co. Nitromaritima RS) pan-genome.

| Function TC | ORF Name     | Family ID | Transporter Family                                                                                                             | Subfamily       |
|-------------|--------------|-----------|--------------------------------------------------------------------------------------------------------------------------------|-----------------|
| 2.A.36      | NspA02_00075 | CPA1      | The Monovalent Cation:Proton Antiporter-1 (CPA1) Family                                                                        |                 |
| 2.A.43      | NspA02_00150 | LCT       | The Lysosomal Cystine Transporter (LCT) Family                                                                                 |                 |
| 3.A.1       | NspA02_00158 | ABC       | The ATP-binding Cassette (ABC) Superfamily                                                                                     | membrane        |
| 3.A.1       | NspA02_00159 | ABC       | The ATP-binding Cassette (ABC) Superfamily                                                                                     | binding         |
| 2.A.21      | NspA02_00197 | SSS       | The Solute:Sodium Symporter (SSS) Family                                                                                       |                 |
| 3.A.1       | NspA02_00394 | ABC       | The ATP-binding Cassette (ABC) Superfamily                                                                                     | binding         |
| 3.A.1       | NspA02_00395 | ABC       | The ATP-binding Cassette (ABC) Superfamily                                                                                     | membrane        |
| 3.A.1       | NspA02_00396 | ABC       | The ATP-binding Cassette (ABC) Superfamily                                                                                     | membrane        |
| 2.A.6       | NspA02_00492 | RND       | The Resistance-Nodulation-Cell Division (RND) Superfamily                                                                      | HAE3            |
| 2.A.66      | NspA02_00634 | MOP       | The Multidrug/Oligosaccharidyl-lipid/Polysaccharide (MOP) Flippase Superfamily                                                 | PST             |
| 3.A.1       | NspA02_00670 | ABC       | The ATP-binding Cassette (ABC) Superfamily                                                                                     | binding         |
| 1.B.6       | NspA02_01127 | OOP       | The OmpA-OmpF Porin (OOP) Family                                                                                               |                 |
| 2.A.6       | NspA02_01136 | RND       | The Resistance-Nodulation-Cell Division (RND) Superfamily                                                                      | HME             |
| 1.B.17      | NspA02_01142 | OMF       | The Outer Membrane Factor (OMF) Family                                                                                         |                 |
| 3.A.1       | NspA02_01143 | ABC       | The ATP-binding Cassette (ABC) Superfamily                                                                                     | binding         |
| 3.A.1       | NspA02_01144 | ABC       | The ATP-binding Cassette (ABC) Superfamily                                                                                     | membrane        |
| 3.A.6       | NspA02_01267 | IIISP     | The Type III (Virulence-related) Secretory Pathway (IIISP) Family                                                              |                 |
| 3.A.1       | NspA02_01293 | ABC       | The ATP-binding Cassette (ABC) Superfamily                                                                                     | binding protein |
| 3.A.1       | NspA02_01294 | ABC       | The ATP-binding Cassette (ABC) Superfamily                                                                                     | membrane        |
| 3.A.1       | NspA02_01296 | ABC       | The ATP-binding Cassette (ABC) Superfamily                                                                                     | membrane        |
| 2.A.21      | NspA02_01376 | SSS       | The Solute:Sodium Symporter (SSS) Family                                                                                       |                 |
| 3.A.1       | NspA02_01440 | ABC       | The ATP-binding Cassette (ABC) Superfamily                                                                                     | membrane        |
| 2.A.62      | NspA02_01491 | NhaD      | The NhaD Na <sup>+</sup> :H <sup>+</sup> Antiporter (NhaD) Family                                                              |                 |
| 2.A.66      | NspC22_00018 | MOP       | The Multidrug/Oligosaccharidyl-lipid/Polysaccharide (MOP) Flippase Superfamily                                                 | PST             |
| 3.A.1       | NspC22_00052 | ABC       | The ATP-binding Cassette (ABC) Superfamily                                                                                     | binding         |
| 3.A.1       | NspC22_00053 | ABC       | The ATP-binding Cassette (ABC) Superfamily                                                                                     | membrane        |
| 3.A.1       | NspC22_00054 | ABC       | The ATP-binding Cassette (ABC) Superfamily                                                                                     | membrane        |
| 2.A.66      | NspC22_00066 | MOP       | The Multidrug/Oligosaccharidyl-lipid/Polysaccharide (MOP) Flippase Superfamily                                                 | MVF             |
| 9.A.10      | NspC22_00071 | ILT       | The Iron/Lead Transporter (ILT) Superfamily                                                                                    |                 |
| 9.A.19      | NspC22_00081 | MgtE      | The Mg <sup>2+</sup> Transporter-E (MgtE) Family                                                                               |                 |
| 2.A.19      | NspC22_00131 | CaCa      | The Ca <sup>2+</sup> :Cation Antiporter (CaCa) Family                                                                          |                 |
| 1.A.30      | NspC22_00142 | Mot/Exb   | The H <sup>+</sup> - or Na <sup>+</sup> -translocating Bacterial Flagellar Motor 1ExbBD Outer Membrane Transport Energizer (Mo |                 |
| 1.B.6       | NspC22_00145 | OOP       | The OmpA-OmpF Porin (OOP) Family                                                                                               |                 |
| 2.A.1       | NspC22_00146 | MFS       | The Major Facilitator Superfamily (MFS)                                                                                        |                 |
| 2.A.64      | NspC22_00155 | Tat       | The Twin Arginine Targeting (Tat) Family                                                                                       |                 |
| 3.A.1       | NspC22_00194 | ABC       | The ATP-binding Cassette (ABC) Superfamily                                                                                     | ABC+ membrane   |
| 3.A.1       | NspC22_00247 | ABC       | The ATP-binding Cassette (ABC) Superfamily                                                                                     | membrane        |
| 3.A.1       | NspC22_00248 | ABC       | The ATP-binding Cassette (ABC) Superfamily                                                                                     | binding         |
| 3.A.1       | NspC22_00249 | ABC       | The ATP-binding Cassette (ABC) Superfamily                                                                                     | binding         |
| 2.A.21      | NspC22_00255 | SSS       | The Solute:Sodium Symporter (SSS) Family                                                                                       |                 |
| 3.A.1       | NspC22_00280 | ABC       | The ATP-binding Cassette (ABC) Superfamily                                                                                     | binding protein |
| 1.A.34      | NspC22_00289 | EVE1-C    | The Envelope Virus E1 Channel (EVE1-C) Family                                                                                  |                 |
| 2.A.86      | NspC22_00327 | AI-2E     | The Autoinducer-2 Exporter (AI-2E) Family (Formerly the PerM Family, TC #9.B.22)                                               |                 |
| 2.A.4       | NspC22_00338 | CDF       | The Cation Diffusion Facilitator (CDF) Family                                                                                  |                 |
| 1.A.30      | NspC22_00347 | Mot/Exb   | The H <sup>+</sup> - or Na <sup>+</sup> -translocating Bacterial Flagellar Motor 1ExbBD Outer Membrane Transport Energizer (Mo |                 |
| 1.A.30      | NspC22_00348 | Mot/Exb   | The H <sup>+</sup> - or Na <sup>+</sup> -translocating Bacterial Flagellar Motor 1ExbBD Outer Membrane Transport Energizer (Mo |                 |
| 3.A.1       | NspC22_00351 | ABC       | The ATP-binding Cassette (ABC) Superfamily                                                                                     | binding         |
| 3.A.1       | NspC22_00362 | ABC       | The ATP-binding Cassette (ABC) Superfamily                                                                                     | binding         |
| 2.A.21      | NspC22_00371 | SSS       | The Solute:Sodium Symporter (SSS) Family                                                                                       |                 |
| 1.A.30      | NspC22_00373 | Mot/Exb   | The H <sup>+</sup> - or Na <sup>+</sup> -translocating Bacterial Flagellar Motor 1ExbBD Outer Membrane Transport Energizer (Mo |                 |
| 2.A.25      | NspC22_00387 | AGCS      | The Alanine or Glycine:Cation Symporter (AGCS) Family                                                                          |                 |
| 2.A.44      | NspC22_00397 | FNT       | The Formate-Nitrite Transporter (FNT) Family                                                                                   |                 |
| 3.A.1       | NspC22_00402 | ABC       | The ATP-binding Cassette (ABC) Superfamily                                                                                     | binding protein |
| 3.A.1       | NspC22_00403 | ABC       | The ATP-binding Cassette (ABC) Superfamily                                                                                     | membrane        |
| 3.A.1       | NspC22_00404 | ABC       | The ATP-binding Cassette (ABC) Superfamily                                                                                     | binding         |
| 2.A.52      | NspC22_00406 | NiCoT     | The Ni <sup>2+</sup> -Co <sup>2+</sup> Transporter (NiCoT) Family                                                              |                 |
| 9.A.10      | NspC22_00429 | ILT       | The Iron/Lead Transporter (ILT) Superfamily                                                                                    |                 |
| 2.A.4       | NspC22_00433 | CDF       | The Cation Diffusion Facilitator (CDF) Family                                                                                  |                 |
| 2.A.21      | NspC22_00439 | SSS       | The Solute:Sodium Symporter (SSS) Family                                                                                       |                 |
| 2.A.20      | NspC22_00443 | PIT       | The Inorganic Phosphate Transporter (PIT) Family                                                                               |                 |
| 2.A.21      | NspC22_00470 | SSS       | The Solute:Sodium Symporter (SSS) Family                                                                                       |                 |
| 2.A.21      | NspC22_00471 | SSS       | The Solute:Sodium Symporter (SSS) Family                                                                                       |                 |
| 2.A.21      | NspC22_00479 | SSS       | The Solute:Sodium Symporter (SSS) Family                                                                                       |                 |
| 2.A.7       | NspC22_00481 | DMT       | The Drug/Metabolite Transporter (DMT) Superfamily                                                                              |                 |
| 3.A.3       | NspC22_00519 | P-ATPase  | The P-type ATPase (P-ATPase) Superfamily                                                                                       |                 |
| 2.A.9       | NspC22_00524 | Oxa1      | The Cytochrome Oxidase Biogenesis (Oxa1) Family                                                                                |                 |
| 2.A.36      | NspC22_00576 | CPA1      | The Monovalent Cation:Proton Antiporter-1 (CPA1) Family                                                                        |                 |
| 3.A.1       | NspC22_00582 | ABC       | The ATP-binding Cassette (ABC) Superfamily                                                                                     | membrane        |
| 3.A.1       | NspC22_00583 | ABC       | The ATP-binding Cassette (ABC) Superfamily                                                                                     | membrane        |
| 3.A.1       | NspC22_00584 | ABC       | The ATP-binding Cassette (ABC) Superfamily                                                                                     | binding         |
| 1.B.6       | NspC22_00636 | OOP       | The OmpA-OmpF Porin (OOP) Family                                                                                               |                 |
| 1.A.30      | NspC22_00637 | Mot/Exb   | The H <sup>+</sup> - or Na <sup>+</sup> -translocating Bacterial Flagellar Motor 1ExbBD Outer Membrane Transport Energizer (Mo |                 |
| 3.A.1       | NspC22_00639 | ABC       | The ATP-binding Cassette (ABC) Superfamily                                                                                     | binding         |
| 3.A.1       | NspC22_00640 | ABC       | The ATP-binding Cassette (ABC) Superfamily                                                                                     | binding         |
| 2.A.21      | NspC22_00653 | SSS       | The Solute:Sodium Symporter (SSS) Family                                                                                       |                 |
| 3.A.1       | NspC22_00657 | ABC       | The ATP-binding Cassette (ABC) Superfamily                                                                                     | binding         |
| 3.A.1       | NspC22_00658 | ABC       | The ATP-binding Cassette (ABC) Superfamily                                                                                     | membrane        |
| 3.A.1       | NspC22_00659 | ABC       | The ATP-binding Cassette (ABC) Superfamily                                                                                     | membrane        |
| 2.A.47      | NspC22_00691 | DASS      | The Divalent Anion:Na <sup>+</sup> Symporter (DASS) Family                                                                     |                 |
| 3.A.1       | NspC22_00712 | ABC       | The ATP-binding Cassette (ABC) Superfamily                                                                                     | membrane        |
| 3.A.1       | NspC22_00713 | ABC       | The ATP-binding Cassette (ABC) Superfamily                                                                                     | membrane        |
| 3.A.1       | NspC22_00714 | ABC       | The ATP-binding Cassette (ABC) Superfamily                                                                                     | binding         |
| 2.A.6       | NspC22_00715 | RND       | The Resistance-Nodulation-Cell Division (RND) Superfamily                                                                      |                 |
| 9.A.4       | NspC22_00739 | YggT      | The YggT or Fancil K <sup>+</sup> Uptake-B (FkuB; YggT) Family                                                                 |                 |
| 3.A.15      | NspC22_00773 | MTB       | The Outer Membrane Protein Secreting Main Terminal Branch (MTB)                                                                |                 |
| 2.A.21      | NspC22_00774 | SSS       | The Solute:Sodium Symporter (SSS) Family                                                                                       |                 |
| 2.A.21      | NspC22_00782 | SSS       | The Solute:Sodium Symporter (SSS) Family                                                                                       |                 |
| 3.A.15      | NspC22_00784 | MTB       | The Outer Membrane Protein Secreting Main Terminal Branch (MTB)                                                                |                 |
| 2.A.56      | NspC22_00825 | TRAP-T    | The Tripartite ATP-independent Periplasmic Transporter (TRAP-T) Family                                                         |                 |
| 2.A.56      | NspC22_00858 | TRAP-T    | The Tripartite ATP-independent Periplasmic Transporter (TRAP-T) Family                                                         |                 |
| 2.A.56      | NspC22_00859 | TRAP-T    | The Tripartite ATP-independent Periplasmic Transporter (TRAP-T) Family                                                         |                 |
| 2.A.22      | NspC22_00874 | NSS       | The Neurotransmitter:Sodium Symporter (NSS) Family                                                                             |                 |
| 2.A.21      | NspC22_00891 | SSS       | The Solute:Sodium Symporter (SSS) Family                                                                                       |                 |
| 3.A.1       | NspC22_00909 | ABC       | The ATP-binding Cassette (ABC) Superfamily                                                                                     | binding         |
| 3.A.1       | NspC22_00910 | ABC       | The ATP-binding Cassette (ABC) Superfamily                                                                                     | binding         |
| 2.A.38      | NspC22_00941 | Trk       | The K <sup>+</sup> Transporter (Trk) Family                                                                                    |                 |
| 2.A.6       | NspC22_00978 | RND       | The Resistance-Nodulation-Cell Division (RND) Superfamily                                                                      | HME             |
| 3.A.1       | NspC22_01023 | ABC       | The ATP-binding Cassette (ABC) Superfamily                                                                                     | membrane        |
| 3.A.1       | NspC22_01024 | ABC       | The ATP-binding Cassette (ABC) Superfamily                                                                                     | binding         |
| 2.A.64      | NspC22_01033 | Tat       | The Twin Arginine Targeting (Tat) Family                                                                                       |                 |
| 1.A.34      | NspC22_01044 | EVE1-C    | The Envelope Virus E1 Channel (EVE1-C) Family                                                                                  |                 |

|        |              |          |                                                                                                                |                 |
|--------|--------------|----------|----------------------------------------------------------------------------------------------------------------|-----------------|
| 4.A    | NspC22_01075 | GPTS     | General PTS                                                                                                    | Enzymel         |
| 4.A    | NspC22_01076 | SSPTS    | Sugar Specific PTS                                                                                             | EnzymelIA       |
| 3.A.1  | NspC22_01079 | ABC      | The ATP-binding Cassette (ABC) Superfamily                                                                     | binding         |
| 3.A.1  | NspC22_01080 | ABC      | The ATP-binding Cassette (ABC) Superfamily                                                                     | ???????         |
| 3.A.15 | NspC22_01097 | MTB      | The Outer Membrane Protein Secreting Main Terminal Branch (MTB)                                                |                 |
| 3.A.1  | NspC22_01102 | ABC      | The ATP-binding Cassette (ABC) Superfamily                                                                     | binding         |
| 3.A.1  | NspC22_01116 | ABC      | The ATP-binding Cassette (ABC) Superfamily                                                                     | binding         |
| 3.A.1  | NspC22_01117 | ABC      | The ATP-binding Cassette (ABC) Superfamily                                                                     | binding protein |
| 3.A.1  | NspC22_01119 | ABC      | The ATP-binding Cassette (ABC) Superfamily                                                                     | membrane        |
| 1.A.11 | NspC22_01140 | Amt      | The Ammonia Transporter Channel (Amt) Family                                                                   |                 |
| 2.A.6  | NspC22_01164 | RND      | The Resistance-Nodulation-Cell Division (RND) Superfamily                                                      | HME             |
| 2.A.6  | NspC22_01176 | RND      | The Resistance-Nodulation-Cell Division (RND) Superfamily                                                      | HME             |
| 2.A.4  | NspC22_01177 | CDF      | The Cation Diffusion Facilitator (CDF) Family                                                                  |                 |
| 3.A.2  | NspC22_01193 | F-ATPase | The H <sup>+</sup> - or Na <sup>+</sup> -translocating F-type, V-type and A-type ATPase (F-ATPase) Superfamily |                 |
| 3.A.2  | NspC22_01194 | F-ATPase | The H <sup>+</sup> - or Na <sup>+</sup> -translocating F-type, V-type and A-type ATPase (F-ATPase) Superfamily |                 |
| 3.A.2  | NspC22_01195 | F-ATPase | The H <sup>+</sup> - or Na <sup>+</sup> -translocating F-type, V-type and A-type ATPase (F-ATPase) Superfamily |                 |
| 3.A.2  | NspC22_01196 | F-ATPase | The H <sup>+</sup> - or Na <sup>+</sup> -translocating F-type, V-type and A-type ATPase (F-ATPase) Superfamily |                 |
| 3.A.2  | NspC22_01197 | F-ATPase | The H <sup>+</sup> - or Na <sup>+</sup> -translocating F-type, V-type and A-type ATPase (F-ATPase) Superfamily |                 |
| 3.A.2  | NspC22_01198 | F-ATPase | The H <sup>+</sup> - or Na <sup>+</sup> -translocating F-type, V-type and A-type ATPase (F-ATPase) Superfamily |                 |
| 3.A.2  | NspC22_01199 | F-ATPase | The H <sup>+</sup> - or Na <sup>+</sup> -translocating F-type, V-type and A-type ATPase (F-ATPase) Superfamily |                 |
| 3.A.2  | NspC22_01200 | F-ATPase | The H <sup>+</sup> - or Na <sup>+</sup> -translocating F-type, V-type and A-type ATPase (F-ATPase) Superfamily |                 |
| 3.A.1  | NspC22_01243 | ABC      | The ATP-binding Cassette (ABC) Superfamily                                                                     | binding         |
| 2.A.1  | NspC22_01272 | MFS      | The Major Facilitator Superfamily (MFS)                                                                        |                 |
| 3.A.1  | NspC22_01293 | ABC      | The ATP-binding Cassette (ABC) Superfamily                                                                     | membrane        |
| 9.A.19 | NspC22_01306 | MgtE     | The Mg <sup>2+</sup> Transporter-E (MgtE) Family                                                               |                 |
| 2.A.21 | NspC22_01329 | SSS      | The Solute-Sodium Symporter (SSS) Family                                                                       |                 |
| 2.A.1  | NspC22_01331 | MFS      | The Major Facilitator Superfamily (MFS)                                                                        |                 |
| 9.A.40 | NspC22_01362 | HCC      | The HlyC/CorC (HCC) Family                                                                                     |                 |
| 9.A.40 | NspC22_01363 | HCC      | The HlyC/CorC (HCC) Family                                                                                     |                 |
| 3.A.1  | NspC22_01416 | ABC      | The ATP-binding Cassette (ABC) Superfamily                                                                     | membrane        |
| 3.A.1  | NspC22_01417 | ABC      | The ATP-binding Cassette (ABC) Superfamily                                                                     | binding         |
| 2.A.64 | NspC22_01449 | Tat      | The Twin Arginine Targeting (Tat) Family                                                                       |                 |
| 2.A.6  | NspC22_01456 | RND      | The Resistance-Nodulation-Cell Division (RND) Superfamily                                                      | HME             |
| 3.A.1  | NspC22_01458 | ABC      | The ATP-binding Cassette (ABC) Superfamily                                                                     | binding         |
| 3.A.1  | NspC22_01460 | ABC      | The ATP-binding Cassette (ABC) Superfamily                                                                     | binding         |
| 2.A.6  | NspC22_01461 | RND      | The Resistance-Nodulation-Cell Division (RND) Superfamily                                                      | HAE3            |
| 3.A.1  | NspC22_01552 | ABC      | The ATP-binding Cassette (ABC) Superfamily                                                                     | binding         |
| 3.A.1  | NspC22_01581 | ABC      | The ATP-binding Cassette (ABC) Superfamily                                                                     | binding protein |
| 3.A.1  | NspC22_01582 | ABC      | The ATP-binding Cassette (ABC) Superfamily                                                                     | membrane        |
| 3.A.1  | NspC22_01583 | ABC      | The ATP-binding Cassette (ABC) Superfamily                                                                     | membrane        |
| 3.A.1  | NspC22_01584 | ABC      | The ATP-binding Cassette (ABC) Superfamily                                                                     | binding         |
| 3.A.1  | NspC22_01612 | ABC      | The ATP-binding Cassette (ABC) Superfamily                                                                     | binding         |
| 3.A.1  | NspC22_01613 | ABC      | The ATP-binding Cassette (ABC) Superfamily                                                                     | membrane        |
| 3.A.1  | NspC22_01614 | ABC      | The ATP-binding Cassette (ABC) Superfamily                                                                     | binding         |
| 3.A.1  | NspC22_01617 | ABC      | The ATP-binding Cassette (ABC) Superfamily                                                                     | binding         |
| 2.A.64 | NspC22_01721 | Tat      | The Twin Arginine Targeting (Tat) Family                                                                       |                 |
| 2.A.38 | NspC22_01734 | Trk      | The K <sup>+</sup> Transporter (Trk) Family                                                                    |                 |
| 1.A.1  | NspC22_01735 | VIC      | The Voltage-gated Ion Channel (VIC) Superfamily                                                                |                 |
