# Supplementary material for: Diversification and niche adaptations of Nitrospina-like bacteria in the polyextreme interfaces of Red Sea brines
Source: PubMed Central journal article supplement — ISME J. 2015 Dec 11;10(6):1383–99. doi: 10.1038/ismej.2015.214 (PMC5029188; doi:10.1038/ismej.2015.214), 2015-12-11
Supplement: ismej2015214x21.pdf [file ismej2015214x21.pdf]

**Table S9C.** Transporters in the NA-SAGs (Co. Nitromaritima NA) pan-genome.

| Function TC | ORF Name     | Family ID  | Transporter Family                                                                                                          | Subfamily       |
|-------------|--------------|------------|-----------------------------------------------------------------------------------------------------------------------------|-----------------|
| 3.A.1       | NspB06_00001 | ABC        | The ATP-binding Cassette (ABC) Superfamily                                                                                  | membrane        |
| 3.A.1       | NspB06_00002 | ABC        | The ATP-binding Cassette (ABC) Superfamily                                                                                  | binding         |
| 2.A.50      | NspB06_00047 | GUP        | The Glycerol Uptake (GUP) Family                                                                                            |                 |
| 2.A.50      | NspB06_00057 | GUP        | The Glycerol Uptake (GUP) Family                                                                                            |                 |
| 2.A.66      | NspB06_00080 | MOP        | The Multidrug/Oligosaccharidyl-lipid/Polysaccharide (MOP) Flippase Superfamily                                              | MVF             |
| 9.A.19      | NspB06_00086 | MgtE       | The Mg <sup>2+</sup> Transporter-E (MgtE) Family                                                                            |                 |
| 3.A.1       | NspB06_00116 | ABC        | The ATP-binding Cassette (ABC) Superfamily                                                                                  | binding         |
| 2.A.7       | NspB06_00120 | DMT        | The Drug/Metabolite Transporter (DMT) Superfamily                                                                           |                 |
| 2.A.64      | NspB06_00149 | Tat        | The Twin Arginine Targeting (Tat) Family                                                                                    |                 |
| 3.A.1       | NspB06_00176 | ABC        | The ATP-binding Cassette (ABC) Superfamily                                                                                  | binding         |
| 3.A.1       | NspB06_00177 | ABC        | The ATP-binding Cassette (ABC) Superfamily                                                                                  | membrane        |
| 2.A.63      | NspB06_00212 | CPA3       | The Monovalent Cation (K <sup>+</sup> or Na <sup>+</sup> ):Proton Antiporter-3 (CPA3) Family                                | MnhA            |
| 2.A.62      | NspB06_00220 | NhaD       | The NhaD Na <sup>+</sup> :H <sup>+</sup> Antiporter (NhaD) Family                                                           |                 |
| 2.A.36      | NspB06_00221 | CPA1       | The Monovalent Cation:Proton Antiporter-1 (CPA1) Family                                                                     |                 |
| 2.A.7       | NspB06_00233 | DMT        | The Drug/Metabolite Transporter (DMT) Superfamily                                                                           |                 |
| 2.A.19      | NspB06_00259 | CaCA       | The Ca <sup>2+</sup> :Cation Antiporter (CaCA) Family                                                                       |                 |
| 2.A.41      | NspB06_00264 | CNT        | The Concentrative Nucleoside Transporter (CNT) Family                                                                       |                 |
| 1.A.30      | NspB06_00270 | Mot/Exb    | The H <sup>+</sup> or Na <sup>+</sup> -translocating Bacterial Flagellar Motor 1ExbD Outer Membrane Transport Energizer (Mo |                 |
| 1.B.6       | NspB06_00272 | OOP        | The OmpA-OmpF Porin (OOP) Family                                                                                            |                 |
| 2.A.1       | NspB06_00273 | MFS        | The Major Facilitator Superfamily (MFS)                                                                                     |                 |
| 2.A.64      | NspB06_00284 | Tat        | The Twin Arginine Targeting (Tat) Family                                                                                    |                 |
| 2.A.63      | NspB06_00288 | CPA3       | The Monovalent Cation (K <sup>+</sup> or Na <sup>+</sup> ):Proton Antiporter-3 (CPA3) Family                                | MnhA            |
| 2.A.21      | NspB06_00308 | SSS        | The Solute:Sodium Symporter (SSS) Family                                                                                    |                 |
| 2.A.66      | NspB06_00312 | MOP        | The Multidrug/Oligosaccharidyl-lipid/Polysaccharide (MOP) Flippase Superfamily                                              | PST             |
| 3.A.1       | NspB06_00374 | ABC        | The ATP-binding Cassette (ABC) Superfamily                                                                                  | binding         |
| 2.A.50      | NspB06_00454 | GUP        | The Glycerol Uptake (GUP) Family                                                                                            |                 |
| 3.A.7       | NspB06_00459 | IVSP       | The Type IV (Conjugal DNA-Protein Transfer or VirB) Secretory Pathway (IVSP) Family                                         |                 |
| 3.A.1       | NspB06_00468 | ABC        | The ATP-binding Cassette (ABC) Superfamily                                                                                  | binding         |
| 2.A.1       | NspB06_00483 | MFS        | The Major Facilitator Superfamily (MFS)                                                                                     |                 |
| 3.A.1       | NspB06_00486 | ABC        | The ATP-binding Cassette (ABC) Superfamily                                                                                  | membrane        |
| 3.A.1       | NspB06_00487 | ABC        | The ATP-binding Cassette (ABC) Superfamily                                                                                  | membrane        |
| 3.A.1       | NspB06_00488 | ABC        | The ATP-binding Cassette (ABC) Superfamily                                                                                  | binding         |
| 3.A.1       | NspB06_00489 | ABC        | The ATP-binding Cassette (ABC) Superfamily                                                                                  | binding         |
| 3.A.1       | NspB06_00503 | ABC        | The ATP-binding Cassette (ABC) Superfamily                                                                                  | membrane        |
| 3.A.1       | NspB06_00504 | ABC        | The ATP-binding Cassette (ABC) Superfamily                                                                                  | binding         |
| 3.A.1       | NspB06_00505 | ABC        | The ATP-binding Cassette (ABC) Superfamily                                                                                  | binding         |
| 2.A.6       | NspB06_00572 | RND        | The Resistance-Nodulation-Cell Division (RND) Superfamily                                                                   | SecDF           |
| 2.A.6       | NspB06_00591 | RND        | The Resistance-Nodulation-Cell Division (RND) Superfamily                                                                   | HAE3            |
| 2.A.7       | NspB06_00675 | DMT        | The Drug/Metabolite Transporter (DMT) Superfamily                                                                           |                 |
| 3.A.1       | NspB06_00676 | ABC        | The ATP-binding Cassette (ABC) Superfamily                                                                                  | binding         |
| 2.A.43      | NspB06_00683 | LCT        | The Lysosomal Cystine Transporter (LCT) Family                                                                              |                 |
| 2.A.1       | NspB06_00686 | MFS        | The Major Facilitator Superfamily (MFS)                                                                                     |                 |
| 3.A.2       | NspB06_00755 | F-ATPase   | The H <sup>+</sup> or Na <sup>+</sup> -translocating F-type, V-type and A-type ATPase (F-ATPase) Superfamily                |                 |
| 3.A.2       | NspB06_00756 | F-ATPase   | The H <sup>+</sup> or Na <sup>+</sup> -translocating F-type, V-type and A-type ATPase (F-ATPase) Superfamily                |                 |
| 3.A.2       | NspB06_00757 | F-ATPase   | The H <sup>+</sup> or Na <sup>+</sup> -translocating F-type, V-type and A-type ATPase (F-ATPase) Superfamily                |                 |
| 3.A.2       | NspB06_00758 | F-ATPase   | The H <sup>+</sup> or Na <sup>+</sup> -translocating F-type, V-type and A-type ATPase (F-ATPase) Superfamily                |                 |
| 2.A.5       | NspB06_00764 | ZIP        | The Zinc (Zn <sup>2+</sup> )-Iron (Fe <sup>2+</sup> ) Permease (ZIP) Family                                                 |                 |
| 3.A.1       | NspB06_00765 | ABC        | The ATP-binding Cassette (ABC) Superfamily                                                                                  | ABC+ membrane   |
| 3.A.1       | NspB06_00766 | ABC        | The ATP-binding Cassette (ABC) Superfamily                                                                                  | binding         |
| 2.A.6       | NspB06_00819 | RND        | The Resistance-Nodulation-Cell Division (RND) Superfamily                                                                   | HAE1            |
| 2.A.6       | NspB06_00820 | RND        | The Resistance-Nodulation-Cell Division (RND) Superfamily                                                                   |                 |
| 2.A.1       | NspB06_00834 | MFS        | The Major Facilitator Superfamily (MFS)                                                                                     |                 |
| 3.A.1       | NspB06_00854 | ABC        | The ATP-binding Cassette (ABC) Superfamily                                                                                  | membrane        |
| 2.A.37      | NspB06_00874 | CPA2       | The Monovalent Cation:Proton Antiporter-2 (CPA2) Family                                                                     |                 |
| 9.A.4       | NspB06_00884 | YggT       | The YggT or Fanciful K <sup>+</sup> Uptake-B (FkuB; YggT) Family                                                            |                 |
| 2.A.1       | NspB06_00893 | MFS        | The Major Facilitator Superfamily (MFS)                                                                                     |                 |
| 2.A.28      | NspB06_00905 | BASS       | The Bile Acid:Na <sup>+</sup> Symporter (BASS) Family                                                                       |                 |
| 3.A.1       | NspB06_00912 | ABC        | The ATP-binding Cassette (ABC) Superfamily                                                                                  | binding         |
| 2.A.21      | NspB06_00928 | SSS        | The Solute:Sodium Symporter (SSS) Family                                                                                    |                 |
| 3.A.1       | NspB06_00967 | ABC        | The ATP-binding Cassette (ABC) Superfamily                                                                                  | binding         |
| 2.A.64      | NspB06_00968 | Tat        | The Twin Arginine Targeting (Tat) Family                                                                                    |                 |
| 3.A.1       | NspB06_01022 | ABC        | The ATP-binding Cassette (ABC) Superfamily                                                                                  | membrane        |
| 3.A.1       | NspB06_01023 | ABC        | The ATP-binding Cassette (ABC) Superfamily                                                                                  | binding         |
| 2.A.58      | NspB06_01100 | PNaS       | The Phosphate:Na <sup>+</sup> Symporter (PNaS) Family                                                                       |                 |
| 3.A.1       | NspB06_01102 | ABC        | The ATP-binding Cassette (ABC) Superfamily                                                                                  | binding         |
| 2.A.9       | NspB06_01190 | Oxa1       | The Cytochrome Oxidase Biogenesis (Oxa1) Family                                                                             |                 |
| 3.A.7       | NspB06_01197 | IVSP       | The Type IV (Conjugal DNA-Protein Transfer or VirB) Secretory Pathway (IVSP) Family                                         |                 |
| 3.A.2       | NspB06_01230 | F-ATPase   | The H <sup>+</sup> or Na <sup>+</sup> -translocating F-type, V-type and A-type ATPase (F-ATPase) Superfamily                |                 |
| 3.A.2       | NspB06_01231 | F-ATPase   | The H <sup>+</sup> or Na <sup>+</sup> -translocating F-type, V-type and A-type ATPase (F-ATPase) Superfamily                |                 |
| 3.A.2       | NspB06_01232 | F-ATPase   | The H <sup>+</sup> or Na <sup>+</sup> -translocating F-type, V-type and A-type ATPase (F-ATPase) Superfamily                |                 |
| 3.A.2       | NspB06_01233 | F-ATPase   | The H <sup>+</sup> or Na <sup>+</sup> -translocating F-type, V-type and A-type ATPase (F-ATPase) Superfamily                |                 |
| 1.A.46      | NspB06_01257 | Bestrophin | The Anion Channel-forming Bestrophin (Bestrophin) Family                                                                    |                 |
| 2.A.64      | NspB06_01295 | Tat        | The Twin Arginine Targeting (Tat) Family                                                                                    |                 |
| 2.A.7       | NspB06_01299 | DMT        | The Drug/Metabolite Transporter (DMT) Superfamily                                                                           |                 |
| 3.A.1       | NspB06_01353 | ABC        | The ATP-binding Cassette (ABC) Superfamily                                                                                  | binding         |
| 3.A.1       | NspB06_01367 | ABC        | The ATP-binding Cassette (ABC) Superfamily                                                                                  | binding protein |
| 3.A.1       | NspB06_01368 | ABC        | The ATP-binding Cassette (ABC) Superfamily                                                                                  | membrane        |
| 3.A.1       | NspB06_01369 | ABC        | The ATP-binding Cassette (ABC) Superfamily                                                                                  | membrane        |
| 3.A.1       | NspB06_01370 | ABC        | The ATP-binding Cassette (ABC) Superfamily                                                                                  | binding         |
| 3.A.1       | NspB06_01373 | ABC        | The ATP-binding Cassette (ABC) Superfamily                                                                                  | binding         |
| 3.A.6       | NspB06_01404 | IIISP      | The Type III (Virulence-related) Secretory Pathway (IIISP) Family                                                           |                 |
| 3.A.6       | NspB06_01405 | IIISP      | The Type III (Virulence-related) Secretory Pathway (IIISP) Family                                                           |                 |
| 3.A.6       | NspB06_01406 | IIISP      | The Type III (Virulence-related) Secretory Pathway (IIISP) Family                                                           |                 |
| 3.A.6       | NspB06_01407 | IIISP      | The Type III (Virulence-related) Secretory Pathway (IIISP) Family                                                           |                 |
| 3.A.1       | NspB06_01454 | ABC        | The ATP-binding Cassette (ABC) Superfamily                                                                                  | binding         |
| 3.A.1       | NspB06_01455 | ABC        | The ATP-binding Cassette (ABC) Superfamily                                                                                  | binding         |
| 3.A.1       | NspB06_01479 | ABC        | The ATP-binding Cassette (ABC) Superfamily                                                                                  | membrane        |
| 3.A.1       | NspB06_01480 | ABC        | The ATP-binding Cassette (ABC) Superfamily                                                                                  | binding         |
| 3.A.1       | NspB06_01482 | ABC        | The ATP-binding Cassette (ABC) Superfamily                                                                                  | membrane        |
| 3.A.15      | NspB06_01510 | MTB        | The Outer Membrane Protein Secreting Main Terminal Branch (MTB)                                                             |                 |
| 2.A.49      | NspB06_01589 | CIC        | The Chloride Carrier/Channel (CIC) Family                                                                                   |                 |
| 2.A.47      | NspB06_01620 | DASS       | The Divalent Anion:Na <sup>+</sup> Symporter (DASS) Family                                                                  |                 |
| 3.A.1       | NspB06_01637 | ABC        | The ATP-binding Cassette (ABC) Superfamily                                                                                  | binding         |
| 2.A.25      | NspB06_01653 | AGCS       | The Alanine or Glycine:Cation Symporter (AGCS) Family                                                                       |                 |
| 3.A.2       | NspB06_01663 | F-ATPase   | The H <sup>+</sup> or Na <sup>+</sup> -translocating F-type, V-type and A-type ATPase (F-ATPase) Superfamily                |                 |
| 3.A.2       | NspB06_01664 | F-ATPase   | The H <sup>+</sup> or Na <sup>+</sup> -translocating F-type, V-type and A-type ATPase (F-ATPase) Superfamily                |                 |
| 2.A.66      | NspB06_01754 | MOP        | The Multidrug/Oligosaccharidyl-lipid/Polysaccharide (MOP) Flippase Superfamily                                              |                 |
| 2.A.25      | NspB06_01785 | AGCS       | The Alanine or Glycine:Cation Symporter (AGCS) Family                                                                       |                 |
| 2.A.44      | NspB06_01948 | FNT        | The Formate-Nitrite Transporter (FNT) Family                                                                                |                 |
| 1.A.23      | NspB06_02032 | MscS       | The Small Conductance Mechanosensitive Ion Channel (MscS) Family                                                            |                 |
| 3.A.6       | NspB18_00054 | IIISP      | The Type III (Virulence-related) Secretory Pathway (IIISP) Family                                                           |                 |
| 2.A.47      | NspB18_00077 | DASS       | The Divalent Anion:Na <sup>+</sup> Symporter (DASS) Family                                                                  |                 |
| 3.A.1       | NspB18_00157 | ABC        | The ATP-binding Cassette (ABC) Superfamily                                                                                  | membrane        |
| 3.A.1       | NspB18_00158 | ABC        | The ATP-binding Cassette (ABC) Superfamily                                                                                  | membrane        |

|        |              |          |                                                                                                                                |                 |
|--------|--------------|----------|--------------------------------------------------------------------------------------------------------------------------------|-----------------|
| 3.A.1  | NspB18_00159 | ABC      | The ATP-binding Cassette (ABC) Superfamily                                                                                     | binding         |
| 2.A.6  | NspB18_00160 | RND      | The Resistance-Nodulation-Cell Division (RND) Superfamily                                                                      |                 |
| 3.A.1  | NspB18_00193 | ABC      | The ATP-binding Cassette (ABC) Superfamily                                                                                     | membrane        |
| 3.A.1  | NspB18_00199 | ABC      | The ATP-binding Cassette (ABC) Superfamily                                                                                     | binding         |
| 2.A.40 | NspB18_00230 | NCS2     | The Nucleobase:Cation Symporter-2 (NCS2) Family                                                                                |                 |
| 1.A.30 | NspB18_00266 | Mot/Exb  | The H <sup>+</sup> - or Na <sup>+</sup> -translocating Bacterial Flagellar Motor 1ExbBD Outer Membrane Transport Energizer (Mo |                 |
| 9.A.10 | NspB18_00303 | ILT      | The Iron/Lead Transporter (ILT) Superfamily                                                                                    |                 |
| 3.A.1  | NspB18_00312 | ABC      | The ATP-binding Cassette (ABC) Superfamily                                                                                     | binding         |
| 3.A.1  | NspB18_00313 | ABC      | The ATP-binding Cassette (ABC) Superfamily                                                                                     | membrane        |
| 3.A.1  | NspB18_00314 | ABC      | The ATP-binding Cassette (ABC) Superfamily                                                                                     | binding         |
| 3.A.1  | NspB18_00402 | ABC      | The ATP-binding Cassette (ABC) Superfamily                                                                                     | ???????         |
| 3.A.1  | NspB18_00403 | ABC      | The ATP-binding Cassette (ABC) Superfamily                                                                                     | binding         |
| 4.A    | NspB18_00406 | SSPTS    | Sugar Specific PTS                                                                                                             | EnzymellA       |
| 4.A    | NspB18_00407 | GPTS     | General PTS                                                                                                                    | Enzymel         |
| 2.A.20 | NspB18_00690 | PIT      | The Inorganic Phosphate Transporter (PIT) Family                                                                               |                 |
| 3.A.7  | NspB18_00705 | IVSP     | The Type IV (Conjugal DNA-Protein Transfer or VirB) Secretory Pathway (IVSP) Family                                            |                 |
| 1.A.11 | NspB18_00716 | Amt      | The Ammonia Transporter Channel (Amt) Family                                                                                   |                 |
| 3.A.1  | NspB18_00756 | ABC      | The ATP-binding Cassette (ABC) Superfamily                                                                                     | membrane        |
| 3.A.1  | NspB18_00757 | ABC      | The ATP-binding Cassette (ABC) Superfamily                                                                                     | membrane        |
| 3.A.15 | NspB18_00774 | MTB      | The Outer Membrane Protein Secreting Main Terminal Branch (MTB)                                                                |                 |
| 3.A.15 | NspB18_00775 | MTB      | The Outer Membrane Protein Secreting Main Terminal Branch (MTB)                                                                |                 |
| 3.A.15 | NspB18_00776 | MTB      | The Outer Membrane Protein Secreting Main Terminal Branch (MTB)                                                                |                 |
| 3.A.3  | NspB18_00814 | P-ATPase | The P-type ATPase (P-ATPase) Superfamily                                                                                       |                 |
| 9.A.40 | NspB18_00860 | HCC      | The HlyC/CorC (HCC) Family                                                                                                     |                 |
| 9.A.40 | NspB18_00861 | HCC      | The HlyC/CorC (HCC) Family                                                                                                     |                 |
| 3.A.1  | NspB18_00934 | ABC      | The ATP-binding Cassette (ABC) Superfamily                                                                                     | membrane        |
| 3.A.1  | NspB18_00935 | ABC      | The ATP-binding Cassette (ABC) Superfamily                                                                                     | binding         |
| 3.A.1  | NspB18_01006 | ABC      | The ATP-binding Cassette (ABC) Superfamily                                                                                     | membrane        |
| 3.A.1  | NspB18_01007 | ABC      | The ATP-binding Cassette (ABC) Superfamily                                                                                     | binding         |
| 3.A.1  | NspB18_01120 | ABC      | The ATP-binding Cassette (ABC) Superfamily                                                                                     | membrane        |
| 3.A.1  | NspB18_01121 | ABC      | The ATP-binding Cassette (ABC) Superfamily                                                                                     | binding         |
| 3.A.2  | NspB18_01139 | F-ATPase | The H <sup>+</sup> - or Na <sup>+</sup> -translocating F-type, V-type and A-type ATPase (F-ATPase) Superfamily                 |                 |
| 3.A.1  | NspB18_01245 | ABC      | The ATP-binding Cassette (ABC) Superfamily                                                                                     | ABC+ membrane   |
| 2.A.21 | NspB18_01273 | SSS      | The Solute:Sodium Symporter (SSS) Family                                                                                       |                 |
| 1.A.34 | NspB18_01298 | EVE1-C   | The Envelope Virus E1 Channel (EVE1-C) Family                                                                                  |                 |
| 2.A.86 | NspB18_01343 | AI-2E    | The Autoinducer-2 Exporter (AI-2E) Family (Formerly the PerM Family, TC #9.B.22)                                               |                 |
| 2.A.4  | NspB18_01354 | CDF      | The Cation Diffusion Facilitator (CDF) Family                                                                                  |                 |
| 2.A.38 | NspB18_01382 | Trk      | The K <sup>+</sup> Transporter (Trk) Family                                                                                    |                 |
| 2.A.63 | NspB18_01391 | CPA3     | The Monovalent Cation (K <sup>+</sup> or Na <sup>+</sup> ):Proton Antiporter-3 (CPA3) Family                                   | MnhE            |
| 2.A.63 | NspB18_01392 | CPA3     | The Monovalent Cation (K <sup>+</sup> or Na <sup>+</sup> ):Proton Antiporter-3 (CPA3) Family                                   | MnhF            |
| 2.A.63 | NspB18_01393 | CPA3     | The Monovalent Cation (K <sup>+</sup> or Na <sup>+</sup> ):Proton Antiporter-3 (CPA3) Family                                   | MnhG            |
| 2.A.63 | NspB18_01394 | CPA3     | The Monovalent Cation (K <sup>+</sup> or Na <sup>+</sup> ):Proton Antiporter-3 (CPA3) Family                                   | MnhB            |
| 2.A.63 | NspB18_01395 | CPA3     | The Monovalent Cation (K <sup>+</sup> or Na <sup>+</sup> ):Proton Antiporter-3 (CPA3) Family                                   | MnhB            |
| 2.A.63 | NspB18_01396 | CPA3     | The Monovalent Cation (K <sup>+</sup> or Na <sup>+</sup> ):Proton Antiporter-3 (CPA3) Family                                   | MnhC            |
| 2.A.63 | NspB18_01397 | CPA3     | The Monovalent Cation (K <sup>+</sup> or Na <sup>+</sup> ):Proton Antiporter-3 (CPA3) Family                                   | MnhD            |
| 2.A.63 | NspB18_01398 | CPA3     | The Monovalent Cation (K <sup>+</sup> or Na <sup>+</sup> ):Proton Antiporter-3 (CPA3) Family                                   | MnhA            |
| 2.A.50 | NspB18_01444 | GUP      | The Glycerol Uptake (GUP) Family                                                                                               |                 |
| 2.A.47 | NspB18_01471 | DASS     | The Divalent Anion:Na <sup>+</sup> Symporter (DASS) Family                                                                     |                 |
| 3.A.1  | NspB18_01725 | ABC      | The ATP-binding Cassette (ABC) Superfamily                                                                                     | binding         |
| 3.A.1  | NspB18_01753 | ABC      | The ATP-binding Cassette (ABC) Superfamily                                                                                     | membrane        |
| 3.A.1  | NspB18_01754 | ABC      | The ATP-binding Cassette (ABC) Superfamily                                                                                     | membrane        |
| 3.A.1  | NspB18_01755 | ABC      | The ATP-binding Cassette (ABC) Superfamily                                                                                     | binding         |
| 2.A.7  | NspB18_01794 | DMT      | The Drug/Metabolite Transporter (DMT) Superfamily                                                                              |                 |
| 3.A.1  | NspB18_01874 | ABC      | The ATP-binding Cassette (ABC) Superfamily                                                                                     | binding         |
| 2.A.6  | NspB18_01908 | RND      | The Resistance-Nodulation-Cell Division (RND) Superfamily                                                                      | HAE3            |
| 3.A.1  | NspB18_01909 | ABC      | The ATP-binding Cassette (ABC) Superfamily                                                                                     | binding         |
| 3.A.1  | NspB18_01919 | ABC      | The ATP-binding Cassette (ABC) Superfamily                                                                                     | binding protein |
| 3.A.1  | NspB18_01924 | ABC      | The ATP-binding Cassette (ABC) Superfamily                                                                                     | ABC+ membrane   |
| 2.A.23 | NspB18_02018 | DAACS    | The Dicarboxylate/Amino Acid:Cation (Na <sup>+</sup> or H <sup>+</sup> ) Symporter (DAACS) Family                              |                 |
| 3.A.1  | NspB18_02057 | ABC      | The ATP-binding Cassette (ABC) Superfamily                                                                                     | binding         |
| 3.A.1  | NspB18_02058 | ABC      | The ATP-binding Cassette (ABC) Superfamily                                                                                     | binding         |
| 2.A.4  | NspB18_02060 | CDF      | The Cation Diffusion Facilitator (CDF) Family                                                                                  |                 |
| 9.A.19 | NspB18_02063 | MgtE     | The Mg <sup>2+</sup> Transporter-E (MgtE) Family                                                                               |                 |
| 1.A.23 | NspB18_02064 | MscS     | The Small Conductance Mechanosensitive Ion Channel (MscS) Family                                                               |                 |
| 2.A.64 | NspB18_02075 | Tat      | The Twin Arginine Targeting (Tat) Family                                                                                       |                 |
| 2.A.6  | NspB18_02077 | RND      | The Resistance-Nodulation-Cell Division (RND) Superfamily                                                                      | HAE3            |
| 2.A.1  | NspB18_02217 | MFS      | The Major Facilitator Superfamily (MFS)                                                                                        |                 |
| 2.A.50 | NspB18_02375 | GUP      | The Glycerol Uptake (GUP) Family                                                                                               |                 |
| 2.A.66 | NspB18_02383 | MOP      | The Multidrug/Oligosaccharidyl-lipid/Polysaccharide (MOP) Flippase Superfamily                                                 | PST             |
| 3.A.1  | NspB18_02395 | ABC      | The ATP-binding Cassette (ABC) Superfamily                                                                                     | membrane        |
| 3.A.1  | NspB18_02420 | ABC      | The ATP-binding Cassette (ABC) Superfamily                                                                                     | membrane        |
| 1.A.34 | NspB18_02494 | EVE1-C   | The Envelope Virus E1 Channel (EVE1-C) Family                                                                                  |                 |
| 3.A.15 | NspB18_02575 | MTB      | The Outer Membrane Protein Secreting Main Terminal Branch (MTB)                                                                |                 |
| 3.A.1  | NspB18_02601 | ABC      | The ATP-binding Cassette (ABC) Superfamily                                                                                     | ABC+ membrane   |
| 2.A.1  | NspB18_02626 | MFS      | The Major Facilitator Superfamily (MFS)                                                                                        |                 |
| 1.A.30 | NspB18_02670 | Mot/Exb  | The H <sup>+</sup> - or Na <sup>+</sup> -translocating Bacterial Flagellar Motor 1ExbBD Outer Membrane Transport Energizer (Mo |                 |
| 3.A.1  | NspB18_02698 | ABC      | The ATP-binding Cassette (ABC) Superfamily                                                                                     | ABC             |
| 3.A.1  | NspB18_02756 | ABC      | The ATP-binding Cassette (ABC) Superfamily                                                                                     | binding         |
| 3.A.1  | NspB18_02817 | ABC      | The ATP-binding Cassette (ABC) Superfamily                                                                                     | binding         |
| 3.A.1  | NspB18_02824 | ABC      | The ATP-binding Cassette (ABC) Superfamily                                                                                     | membrane        |
| 3.A.1  | NspB18_02827 | ABC      | The ATP-binding Cassette (ABC) Superfamily                                                                                     | binding         |
| 3.A.1  | NspB18_02861 | ABC      | The ATP-binding Cassette (ABC) Superfamily                                                                                     | ABC             |
