# Supplementary material for: Diversification and niche adaptations of Nitrospina-like bacteria in the polyextreme interfaces of Red Sea brines
Source: PubMed Central journal article supplement — ISME J. 2015 Dec 11;10(6):1383–99. doi: 10.1038/ismej.2015.214 (PMC5029188; doi:10.1038/ismej.2015.214), 2015-12-11
Supplement: ismej2015214x22.pdf [file ismej2015214x22.pdf]

**Table S9D.** Transporters in the NP-SAG (*Co. Nitromaritima* sp. NP) genome.

| Function TC | ORF Name     | Family ID             | Transporter Family                                                                                                             | Subfamily       | Substrate/Function                              |
|-------------|--------------|-----------------------|--------------------------------------------------------------------------------------------------------------------------------|-----------------|-------------------------------------------------|
| 3.A.1       | NspL16_00034 | ABC                   | The ATP-binding Cassette (ABC) Superfamily                                                                                     |                 | binding phosphonate                             |
| 3.A.1       | NspL16_00035 | ABC                   | The ATP-binding Cassette (ABC) Superfamily                                                                                     | binding         | lipoprotein                                     |
| 3.A.1       | NspL16_00036 | ABC                   | The ATP-binding Cassette (ABC) Superfamily                                                                                     | membrane        | cell division                                   |
| 2.A.64      | NspL16_00059 | Tat                   | The Twin Arginine Targeting (Tat) Family                                                                                       |                 | protein export                                  |
| 3.A.1       | NspL16_00085 | ABC                   | The ATP-binding Cassette (ABC) Superfamily                                                                                     | binding         | lipoprotein                                     |
| 3.A.1       | NspL16_00086 | ABC                   | The ATP-binding Cassette (ABC) Superfamily                                                                                     | membrane        | efflux (antimicrobial peptide?)                 |
| 2.A.66      | NspL16_00124 | MOP                   | The Multidrug/Oligosaccharidyl-lipid/Polysaccharide (MOP) Flippase Superfamily                                                 | MVF             | virulence factor MvIN                           |
| 9.A.19      | NspL16_00136 | MgtE                  | The Mg <sup>2+</sup> Transporter-E (MgtE) Family                                                                               |                 | magnesium ion                                   |
| 3.A.1       | NspL16_00167 | ABC                   | The ATP-binding Cassette (ABC) Superfamily                                                                                     | binding         | lipid A                                         |
| 2.A.7       | NspL16_00171 | DMT                   | The Drug/Metabolite Transporter (DMT) Superfamily                                                                              |                 | drug/metabolite?                                |
| 3.A.1       | NspL16_00193 | ABC                   | The ATP-binding Cassette (ABC) Superfamily                                                                                     | binding         | daunorubicin                                    |
| 4.A         | NspL16_00196 | SSPTS                 | Sugar Specific PTS                                                                                                             | EnzymelIA       | fructose                                        |
| 4.A         | NspL16_00198 | GPTS                  | General PTS                                                                                                                    | Enzymel         |                                                 |
| 3.A.1       | NspL16_00205 | ABC                   | The ATP-binding Cassette (ABC) Superfamily                                                                                     | binding protein | oligopeptide                                    |
| 3.A.1       | NspL16_00206 | ABC                   | The ATP-binding Cassette (ABC) Superfamily                                                                                     | membrane        | dipeptide/oligopeptide                          |
| 3.A.1       | NspL16_00207 | ABC                   | The ATP-binding Cassette (ABC) Superfamily                                                                                     | membrane        | dipeptide/oligopeptide                          |
| 3.A.1       | NspL16_00208 | ABC                   | The ATP-binding Cassette (ABC) Superfamily                                                                                     | binding         | glycine betaine                                 |
| 2.A.21      | NspL16_00234 | SSS                   | The Solute: Sodium Symporter (SSS) Family                                                                                      |                 | sodium ion:proline symporter                    |
| 2.A.66      | NspL16_00238 | MOP                   | The Multidrug/Oligosaccharidyl-lipid/Polysaccharide (MOP) Flippase Superfamily                                                 | PST             | polysaccharide export                           |
| 1.A.46      | NspL16_00242 | Bestrophin            | The Anion Channel-forming Bestrophin (Bestrophin) Family                                                                       |                 | Bestrophin anion channel                        |
| 3.A.15      | NspL16_00265 | MTB                   | The Outer Membrane Protein Secreting Main Terminal Branch (MTB)                                                                |                 |                                                 |
| 2.A.1       | NspL16_00399 | MFS                   | The Major Facilitator Superfamily (MFS)                                                                                        |                 | nitrate                                         |
| 3.A.1       | NspL16_00412 | ABC                   | The ATP-binding Cassette (ABC) Superfamily                                                                                     | binding         | glycine betaine                                 |
| 2.A.9       | NspL16_00455 | Oxa1                  | The Cytochrome Oxidase Biogenesis (Oxa1) Family                                                                                |                 | 60 KD inner membrane protein OxaA homolog       |
| 2.A.47      | NspL16_00469 | DASS                  | The Divalent Anion:Na <sup>+</sup> Symporter (DASS) Family                                                                     |                 | sodium ion:dicarboxylate/sulfate                |
| 2.A.1       | NspL16_00486 | MFS                   | The Major Facilitator Superfamily (MFS)                                                                                        |                 | multidrug efflux                                |
| 3.A.1       | NspL16_00490 | ABC                   | The ATP-binding Cassette (ABC) Superfamily                                                                                     | membrane        | dipeptide/oligopeptide                          |
| 3.A.1       | NspL16_00491 | ABC                   | The ATP-binding Cassette (ABC) Superfamily                                                                                     | membrane        | dipeptide/oligopeptide                          |
| 3.A.1       | NspL16_00492 | ABC                   | The ATP-binding Cassette (ABC) Superfamily                                                                                     | binding         | phosphonate                                     |
| 9.A.6       | NspL16_00499 | ATP-E                 | The ATP Exporter (ATP-E) Family                                                                                                |                 |                                                 |
| 2.A.64      | NspL16_00521 | Tat                   | The Twin Arginine Targeting (Tat) Family                                                                                       |                 | protein export                                  |
| 3.A.10      | NspL16_00533 | H <sup>+</sup> -PPase | The H <sup>+</sup> -translocating Pyrophosphatase (H <sup>+</sup> -PPase) Family                                               |                 | proton (vacuolar)                               |
| 3.A.1       | NspL16_00556 | ABC                   | The ATP-binding Cassette (ABC) Superfamily                                                                                     | binding         | toluene tolerance                               |
| 2.A.22      | NspL16_00560 | NSS                   | The Neurotransmitter:Sodium Symporter (NSS) Family                                                                             |                 | sodium ion:solute symporter                     |
| 3.A.1       | NspL16_00571 | ABC                   | The ATP-binding Cassette (ABC) Superfamily                                                                                     | binding         | lipoprotein                                     |
| 3.A.1       | NspL16_00572 | ABC                   | The ATP-binding Cassette (ABC) Superfamily                                                                                     | membrane        | lipoprotein releasing                           |
| 3.A.1       | NspL16_00573 | ABC                   | The ATP-binding Cassette (ABC) Superfamily                                                                                     | membrane        | lipoprotein releasing                           |
| 3.A.1       | NspL16_00579 | ABC                   | The ATP-binding Cassette (ABC) Superfamily                                                                                     | binding         | iron-hydroxamate                                |
| 3.A.1       | NspL16_00647 | ABC                   | The ATP-binding Cassette (ABC) Superfamily                                                                                     | membrane        | dipeptide/oligopeptide                          |
| 3.A.1       | NspL16_00648 | ABC                   | The ATP-binding Cassette (ABC) Superfamily                                                                                     | membrane        | dipeptide/oligopeptide                          |
| 3.A.1       | NspL16_00672 | ABC                   | The ATP-binding Cassette (ABC) Superfamily                                                                                     | binding         | leucine/valine                                  |
| 3.A.6       | NspL16_00680 | IIIIS                 | The Type III (Virulence-related) Secretory Pathway (IIIIS) Family                                                              |                 |                                                 |
| 2.A.50      | NspL16_00692 | GUP                   | The Glycerol Uptake (GUP) Family                                                                                               |                 | glycerol:proton symporter                       |
| 2.A.1       | NspL16_00733 | MFS                   | The Major Facilitator Superfamily (MFS)                                                                                        |                 | multidrug efflux?                               |
| 2.A.28      | NspL16_00743 | BASS                  | The Bile Acid:Na <sup>+</sup> Symporter (BASS) Family                                                                          |                 | sodium ion?                                     |
| 2.A.19      | NspL16_00752 | CaCA                  | The Ca <sup>2+</sup> :Cation Antiporter (CaCA) Family                                                                          |                 | sodium ion:calcium ion antiporter               |
| 2.A.41      | NspL16_00759 | CNT                   | The Concentrative Nucleoside Transporter (CNT) Family                                                                          |                 | sodium ion:nucleoside symporter                 |
| 1.A.30      | NspL16_00764 | Mot/Exb               | The H <sup>+</sup> - or Na <sup>+</sup> -translocating Bacterial Flagellar Motor 1ExbBD Outer Membrane Transport Energizer (Mo |                 |                                                 |
| 1.B.6       | NspL16_00766 | OOP                   | The OmpA-OmpF Porin (OOP) Family                                                                                               |                 |                                                 |
| 2.A.1       | NspL16_00767 | MFS                   | The Major Facilitator Superfamily (MFS)                                                                                        |                 | Acetyl-CoA:CoA antiporter                       |
| 2.A.64      | NspL16_00777 | Tat                   | The Twin Arginine Targeting (Tat) Family                                                                                       |                 | protein export                                  |
| 3.A.1       | NspL16_00812 | ABC                   | The ATP-binding Cassette (ABC) Superfamily                                                                                     | ABC+ membrane   | multidrug                                       |
| 1.B.6       | NspL16_00822 | OOP                   | The OmpA-OmpF Porin (OOP) Family                                                                                               |                 |                                                 |
| 1.A.30      | NspL16_00823 | Mot/Exb               | The H <sup>+</sup> - or Na <sup>+</sup> -translocating Bacterial Flagellar Motor 1ExbBD Outer Membrane Transport Energizer (Mo |                 |                                                 |
| 3.A.1       | NspL16_00824 | ABC                   | The ATP-binding Cassette (ABC) Superfamily                                                                                     | binding         | glycine betaine                                 |
| 3.A.1       | NspL16_00825 | ABC                   | The ATP-binding Cassette (ABC) Superfamily                                                                                     | binding         | phosphate                                       |
| 2.A.4       | NspL16_00827 | CDF                   | The Cation Diffusion Facilitator (CDF) Family                                                                                  |                 | cation efflux                                   |
| 9.A.10      | NspL16_00836 | ILT                   | The Iron/Lead Transporter (ILT) Superfamily                                                                                    |                 | iron ion                                        |
| 2.A.25      | NspL16_00860 | AGCS                  | The Alanine or Glycine:Cation Symporter (AGCS) Family                                                                          |                 | sodium ion:alanine symporter                    |
| 1.A.30      | NspL16_00874 | Mot/Exb               | The H <sup>+</sup> - or Na <sup>+</sup> -translocating Bacterial Flagellar Motor 1ExbBD Outer Membrane Transport Energizer (Mo |                 |                                                 |
| 3.A.1       | NspL16_00878 | ABC                   | The ATP-binding Cassette (ABC) Superfamily                                                                                     | binding         | cobalt                                          |
| 1.A.1       | NspL16_00887 | VIC                   | The Voltage-gated Ion Channel (VIC) Superfamily                                                                                |                 | potassium ion channel                           |
| 2.A.6       | NspL16_00894 | RND                   | The Resistance-Nodulation-Cell Division (RND) Superfamily                                                                      | HAE3            | multidrug/solvent efflux (HAE3 subfamily)       |
| 3.A.1       | NspL16_01010 | ABC                   | The ATP-binding Cassette (ABC) Superfamily                                                                                     | membrane        | efflux (antimicrobial peptide?)                 |
| 3.A.1       | NspL16_01011 | ABC                   | The ATP-binding Cassette (ABC) Superfamily                                                                                     | membrane        | efflux (antimicrobial peptide?)                 |
| 3.A.1       | NspL16_01012 | ABC                   | The ATP-binding Cassette (ABC) Superfamily                                                                                     | binding         | lipoprotein                                     |
| 2.A.6       | NspL16_01013 | RND                   | The Resistance-Nodulation-Cell Division (RND) Superfamily                                                                      |                 | multidrug efflux                                |
| 9.A.4       | NspL16_01028 | YggT                  | The YggT or Fanciful K <sup>+</sup> Uptake-B (FkuB; YggT) Family                                                               |                 | ?                                               |
| 3.A.1       | NspL16_01045 | ABC                   | The ATP-binding Cassette (ABC) Superfamily                                                                                     | membrane        | ? (Fe-S assembly/SufBCD system)                 |
| 3.A.1       | NspL16_01046 | ABC                   | The ATP-binding Cassette (ABC) Superfamily                                                                                     | ABC             | ? (Fe-S assembly/SufBCD system)                 |
| 3.A.1       | NspL16_01047 | ABC                   | The ATP-binding Cassette (ABC) Superfamily                                                                                     | membrane        | ? (Fe-S assembly/SufBCD system)                 |
| 3.A.1       | NspL16_01057 | ABC                   | The ATP-binding Cassette (ABC) Superfamily                                                                                     | binding         | phosphate                                       |
| 3.A.1       | NspL16_01058 | ABC                   | The ATP-binding Cassette (ABC) Superfamily                                                                                     | binding         | phosphonate                                     |
| 3.A.1       | NspL16_01059 | ABC                   | The ATP-binding Cassette (ABC) Superfamily                                                                                     | membrane        | branched-chain amino acid                       |
| 3.A.1       | NspL16_01060 | ABC                   | The ATP-binding Cassette (ABC) Superfamily                                                                                     | membrane        | branched-chain amino acid                       |
| 3.A.1       | NspL16_01061 | ABC                   | The ATP-binding Cassette (ABC) Superfamily                                                                                     | membrane        | branched-chain amino acid                       |
| 3.A.1       | NspL16_01062 | ABC                   | The ATP-binding Cassette (ABC) Superfamily                                                                                     | binding         | urea                                            |
| 2.A.20      | NspL16_01078 | PIT                   | The Inorganic Phosphate Transporter (PIT) Family                                                                               |                 | phosphate                                       |
| 2.A.6       | NspL16_01082 | RND                   | The Resistance-Nodulation-Cell Division (RND) Superfamily                                                                      | HME             | cobalt/zinc/cadmium ion efflux (HME subfamily)  |
| 3.A.7       | NspL16_01099 | IVSP                  | The Type IV (Conjugal DNA-Protein Transfer or VirB) Secretory Pathway (IVSP) Family                                            |                 |                                                 |
| 1.A.11      | NspL16_01109 | Amt                   | The Ammonia Transporter Channel (Amt) Family                                                                                   |                 | ammonium                                        |
| 2.A.64      | NspL16_01115 | Tat                   | The Twin Arginine Targeting (Tat) Family                                                                                       |                 | protein export                                  |
| 2.A.1       | NspL16_01185 | MFS                   | The Major Facilitator Superfamily (MFS)                                                                                        |                 | multidrug efflux?                               |
| 2.A.40      | NspL16_01200 | NCS2                  | The Nucleobase:Cation Symporter-2 (NCS2) Family                                                                                |                 | xanthine/uracil                                 |
| 2.A.6       | NspL16_01217 | RND                   | The Resistance-Nodulation-Cell Division (RND) Superfamily                                                                      | SecDF           | protein export (SecDF)                          |
| 3.A.1       | NspL16_01223 | ABC                   | The ATP-binding Cassette (ABC) Superfamily                                                                                     | membrane        | lipoprotein releasing                           |
| 2.A.21      | NspL16_01250 | SSS                   | The Solute: Sodium Symporter (SSS) Family                                                                                      |                 | sodium ion:proline symporter                    |
| 3.A.1       | NspL16_01276 | ABC                   | The ATP-binding Cassette (ABC) Superfamily                                                                                     | ABC+ membrane   | multidrug                                       |
| 2.A.23      | NspL16_01292 | DAACS                 | The Dicarboxylate/Amino Acid:Cation (Na <sup>+</sup> or H <sup>+</sup> ) Symporter (DAACS) Family                              |                 | proton/sodium ion:glutamate/aspartate symporter |
| 2.A.1       | NspL16_01301 | MFS                   | The Major Facilitator Superfamily (MFS)                                                                                        |                 | multidrug efflux                                |
| 3.A.1       | NspL16_01303 | ABC                   | The ATP-binding Cassette (ABC) Superfamily                                                                                     | binding protein | ?                                               |
| 3.A.15      | NspL16_01316 | MTB                   | The Outer Membrane Protein Secreting Main Terminal Branch (MTB)                                                                |                 |                                                 |
| 3.A.15      | NspL16_01317 | MTB                   | The Outer Membrane Protein Secreting Main Terminal Branch (MTB)                                                                |                 |                                                 |
| 3.A.15      | NspL16_01318 | MTB                   | The Outer Membrane Protein Secreting Main Terminal Branch (MTB)                                                                |                 |                                                 |

|        |              |          |                                                                   |                 |                                                |
|--------|--------------|----------|-------------------------------------------------------------------|-----------------|------------------------------------------------|
| 3.A.1  | NspL16_01333 | ABC      | The ATP-binding Cassette (ABC) Superfamily                        | membrane        | lipoprotein releasing                          |
| 3.A.1  | NspL16_01334 | ABC      | The ATP-binding Cassette (ABC) Superfamily                        | binding         | lipoprotein                                    |
| 3.A.1  | NspL16_01338 | ABC      | The ATP-binding Cassette (ABC) Superfamily                        | binding         | lipid A                                        |
| 3.A.15 | NspL16_01342 | MTB      | The Outer Membrane Protein Secreting Main Terminal Branch (MTB)   |                 |                                                |
| 2.A.49 | NspL16_01401 | CIC      | The Chloride Carrier/Channel (CIC) Family                         |                 | chloride ion channel                           |
| 3.A.3  | NspL16_01404 | P-ATPase | The P-type ATPase (P-ATPase) Superfamily                          |                 | zinc/cadmium/cobalt ion                        |
| 2.A.1  | NspL16_01437 | MFS      | The Major Facilitator Superfamily (MFS)                           |                 | multidrug efflux                               |
| 3.A.6  | NspL16_01446 | IIISP    | The Type III (Virulence-related) Secretory Pathway (IIISP) Family |                 |                                                |
| 3.A.6  | NspL16_01447 | IIISP    | The Type III (Virulence-related) Secretory Pathway (IIISP) Family |                 |                                                |
| 3.A.6  | NspL16_01448 | IIISP    | The Type III (Virulence-related) Secretory Pathway (IIISP) Family |                 |                                                |
| 3.A.6  | NspL16_01449 | IIISP    | The Type III (Virulence-related) Secretory Pathway (IIISP) Family |                 |                                                |
| 3.A.6  | NspL16_01450 | IIISP    | The Type III (Virulence-related) Secretory Pathway (IIISP) Family |                 |                                                |
| 2.A.6  | NspL16_01479 | RND      | The Resistance-Nodulation-Cell Division (RND) Superfamily         | HAE3            | multidrug/solvent efflux (HAE3 subfamily)      |
| 2.A.64 | NspL16_01481 | Tat      | The Twin Arginine Targeting (Tat) Family                          |                 | protein export                                 |
| 3.A.1  | NspL16_01514 | ABC      | The ATP-binding Cassette (ABC) Superfamily                        | membrane        | phosphonate                                    |
| 9.A.40 | NspL16_01550 | HCC      | The HlyC/CorC (HCC) Family                                        |                 | hemolysin C (HlyC) homolog                     |
| 9.A.40 | NspL16_01551 | HCC      | The HlyC/CorC (HCC) Family                                        |                 | hemolysin C (HlyC) homolog                     |
| 3.A.1  | NspL16_01576 | ABC      | The ATP-binding Cassette (ABC) Superfamily                        | binding         | iron-hydroxamate                               |
| 3.A.1  | NspL16_01577 | ABC      | The ATP-binding Cassette (ABC) Superfamily                        | binding         | phosphonate                                    |
| 3.A.1  | NspL16_01578 | ABC      | The ATP-binding Cassette (ABC) Superfamily                        | membrane        | cobalamin/Fe3+-siderophores                    |
| 2.A.37 | NspL16_01593 | CPA2     | The Monovalent Cation:Proton Antiporter-2 (CPA2) Family           |                 | potassium/sodium ion:proton antiporter         |
| 3.A.1  | NspL16_01599 | ABC      | The ATP-binding Cassette (ABC) Superfamily                        | binding         | lipoprotein                                    |
| 2.A.43 | NspL16_01607 | LCT      | The Lysosomal Cystine Transporter (LCT) Family                    |                 |                                                |
| 2.A.6  | NspL16_01676 | RND      | The Resistance-Nodulation-Cell Division (RND) Superfamily         | HAE3            | multidrug/solvent efflux (HAE3 subfamily)      |
| 3.A.1  | NspL16_01701 | ABC      | The ATP-binding Cassette (ABC) Superfamily                        | binding protein | oligopeptide                                   |
| 2.A.50 | NspL16_01739 | GUP      | The Glycerol Uptake (GUP) Family                                  |                 | glycerol:proton symporter                      |
| 9.A.19 | NspL16_01851 | MgtE     | The Mg2+ Transporter-E (MgtE) Family                              |                 | magnesium ion                                  |
| 1.A.23 | NspL16_01854 | MscS     | The Small Conductance Mechanosensitive Ion Channel (MscS) Family  |                 | small-conductance mechanosensitive ion channel |
| 1.A.23 | NspL16_01882 | MscS     | The Small Conductance Mechanosensitive Ion Channel (MscS) Family  |                 | small-conductance mechanosensitive ion channel |
| 1.A.1  | NspL16_01931 | VIC      | The Voltage-gated Ion Channel (VIC) Superfamily                   |                 | potassium ion channel                          |
| 3.A.1  | NspL16_01946 | ABC      | The ATP-binding Cassette (ABC) Superfamily                        | membrane        | ?                                              |
| 1.A.34 | NspL16_02023 | EVE1-C   | The Envelope Virus E1 Channel (EVE1-C) Family                     |                 |                                                |
| 9.A.19 | NspL16_02034 | MgtE     | The Mg2+ Transporter-E (MgtE) Family                              |                 | magnesium ion                                  |
| 2.A.21 | NspL16_02062 | SSS      | The Solute:Sodium Symporter (SSS) Family                          |                 | sodium ion:proline symporter                   |
| 2.A.47 | NspL16_02166 | DASS     | The Divalent Anion:Na+ Symporter (DASS) Family                    |                 | sodium ion:dicarboxylate/sulfate               |
| 2.A.21 | NspL16_02188 | SSS      | The Solute:Sodium Symporter (SSS) Family                          |                 | sodium ion:proline symporter                   |
| 3.A.1  | NspL16_02217 | ABC      | The ATP-binding Cassette (ABC) Superfamily                        | binding         | molybdate                                      |
| 3.A.1  | NspL16_02218 | ABC      | The ATP-binding Cassette (ABC) Superfamily                        | membrane        | molybdate                                      |
| 3.A.1  | NspL16_02219 | ABC      | The ATP-binding Cassette (ABC) Superfamily                        | binding         | molybdenate                                    |
| 2.A.44 | NspL16_02239 | FNT      | The Formate-Nitrite Transporter (FNT) Family                      |                 | formate/nitrite                                |
| 3.A.1  | NspL16_02263 | ABC      | The ATP-binding Cassette (ABC) Superfamily                        | ABC             | ? (Uup homolog/duplicated ATPase)              |
